# Supplementary material for: Changing incidence of reported viral hepatitis in China from 2004 to 2016: an observational study
Source: PubMed Central journal article supplement — BMJ Open. 2019 Aug 18;9(8):e028248. doi: 10.1136/bmjopen-2018-028248 (PMC6701656; doi:10.1136/bmjopen-2018-028248), 2019-08-18
Supplement: bmjopen-2018-028248.draft_revisions.pdf [file bmjopen-2018-028248.draft_revisions.pdf]

# BMJ Open

BMJ Open is committed to open peer review. As part of this commitment we make the peer review history of every article we publish publicly available.

When an article is published we post the peer reviewers' comments and the authors' responses online. We also post the versions of the paper that were used during peer review. These are the versions that the peer review comments apply to.

The versions of the paper that follow are the versions that were submitted during the peer review process. They are not the versions of record or the final published versions. They should not be cited or distributed as the published version of this manuscript.

BMJ Open is an open access journal and the full, final, typeset and author-corrected version of record of the manuscript is available on our site with no access controls, subscription charges or pay-per-view fees (<http://bmjopen.bmj.com>).

If you have any questions on BMJ Open's open peer review process please email [info.bmjopen@bmj.com](mailto:info.bmjopen@bmj.com)

# BMJ Open

## Changing incidence of reported viral hepatitis in China from 2004 to 2016

|                               |                                                                                                                                                                                                                                                                                                                                                                                                                                                                                                                                                                                                                                                                                                                                                                                                                                                                               |
|-------------------------------|-------------------------------------------------------------------------------------------------------------------------------------------------------------------------------------------------------------------------------------------------------------------------------------------------------------------------------------------------------------------------------------------------------------------------------------------------------------------------------------------------------------------------------------------------------------------------------------------------------------------------------------------------------------------------------------------------------------------------------------------------------------------------------------------------------------------------------------------------------------------------------|
| Journal:                      | <i>BMJ Open</i>                                                                                                                                                                                                                                                                                                                                                                                                                                                                                                                                                                                                                                                                                                                                                                                                                                                               |
| Manuscript ID                 | bmjopen-2018-028248                                                                                                                                                                                                                                                                                                                                                                                                                                                                                                                                                                                                                                                                                                                                                                                                                                                           |
| Article Type:                 | Research                                                                                                                                                                                                                                                                                                                                                                                                                                                                                                                                                                                                                                                                                                                                                                                                                                                                      |
| Date Submitted by the Author: | 28-Nov-2018                                                                                                                                                                                                                                                                                                                                                                                                                                                                                                                                                                                                                                                                                                                                                                                                                                                                   |
| Complete List of Authors:     | Zhang, Mingyuan; First Hospital of Jilin University, Hepatology department<br>Wu, Ruihong; First Hospital of Jilin University, Hepatology department<br>Xu, Hongqin; First Hospital of Jilin University, Hepatology department<br>Uhanova, Julia; University of Manitoba College of Medicine, Department of Internal Medicine<br>Gish, Robert ; Stanford Hospital and Clinics, Department of Medicine<br>Wen, Xiaoyu; First Hospital of Jilin University, Hepatology department<br>Jin, Qinglong; First Hospital of Jilin University, Hepatology department<br>Gerald, Minuk; University of Manitoba College of Medicine, Department of Internal Medicine<br>Nguyen, M; Stanford Hospital and Clinics, Department of Medicine<br>Gao, Yanhang; First Hospital of Jilin University, Hepatology department<br>Niu, J; First Hospital of Jilin University, Hepatology department |
| Keywords:                     | HEPATITIS, EPIDEMIOLOGY, SCREENING, PREVENTION                                                                                                                                                                                                                                                                                                                                                                                                                                                                                                                                                                                                                                                                                                                                                                                                                                |
|                               |                                                                                                                                                                                                                                                                                                                                                                                                                                                                                                                                                                                                                                                                                                                                                                                                                                                                               |

SCHOLARONE™  
Manuscripts

**Title page:****Title: Changing incidence of reported viral hepatitis in China from 2004 to 2016**

Mingyuan Zhang, MD<sup>1</sup>, Ruihong Wu, M.Sc<sup>1</sup>, Hongqin Xu, PhD<sup>1</sup>, Julia Uhanova, MD<sup>2</sup>, Robert G Gish, MD<sup>3</sup>, Xiaoyu Wen, MD<sup>1</sup>, Qinglong Jin, MD<sup>1</sup>, Gerald Y Minuk<sup>2</sup>, Mindie H. Nguyen, MD<sup>3</sup>, Yanhang Gao, MD<sup>1</sup>, Junqi Niu, MD<sup>1</sup>

Mingyuan Zhang, MD, Department of Hepatology, The First Hospital of Jilin University, Changchun, Jilin, China

Ruihong Wu, M.Sc, Department of Hepatology, The First Hospital of Jilin University, Changchun, Jilin, China

Hongqin Xu, PhD, Department of Hepatology, The First Hospital of Jilin University, Changchun, Jilin, China

Julia Uhanova, associate professor, Section of Hepatology, Department of Internal Medicine, Rady Faculty of Health Sciences, University of Manitoba, Winnipeg, Manitoba, Canada

Robert G Gish, MD, professor, Division of Gastroenterology and Hepatology, Department of Medicine, Stanford University Medical Center, Stanford, Palo Alto, USA

Xiaoyu Wen, associate professor, Department of Hepatology, The First Hospital of Jilin University, Changchun, Jilin, China

Qinglong Jin, professor, Department of Hepatology, The First Hospital of Jilin University, Changchun, Jilin, China

Gerald Y Minuk, professor, Section of Hepatology, Department of Internal Medicine, Rady Faculty of Health Sciences, University of Manitoba, Winnipeg, Manitoba, Canada

Mindie H. Nguyen, professor, Division of Gastroenterology and Hepatology, Department of Medicine, Stanford University Medical Center, Stanford, Palo Alto, USA

Yanhang Gao, professor, Department of Hepatology, The First Hospital of Jilin University, Changchun, Jilin, China

Junqi Niu, professor, head of Hepatology department. The First Hospital of Jilin University, Changchun, Jilin, China

**WORD: 2669** (Exclude abstract and reference)

1  
2  
3  
4 **Key words: Hepatitis; Epidemiology; Screening; Prevention**  
5

6 Corresponding author: Name: Junqi Niu  
7

8 Addresses: No.71 Xinmin Street, Changchun, 130021  
9

10 E-mail: junqiniu@aliyun.com  
11

12  
13 Tel: 0431-8187 5101; Mobile: +86 137 5666 1205; Fax: 0431-8878 6006  
14

15 First author: Name: Mingyuan Zhang, Addresses: No.71 Xinmin Street, Changchun, 130021  
16

17 E-mail: mingyuan-zhang@hotmail.com; Tel: 0431-8187 5115; Mobile: +86 138 4410 9523  
18  
19  
20  
21  
22

23 **Contributorship statement:**  
24

25 Guarantor of article: JN  
26

27  
28 Specific author contributions: MZ was first author, MZ wrote the first draft of the manuscript,  
29 collected data in the study site, RW, HX assisted MZ to run the study, interpret the data, JU, RGG  
30 contributed in manuscript discussion. XW, QJ contributed to the data collection. GYM, MHN  
31 contributed to data analysis and interpretation and major revision of the manuscript. YG advised  
32 on study design and contributed to the manuscript discussion. The corresponding author JN  
33 designed and organised the study and had full access to all the data in the study and had final  
34 responsibility for the decision on content and publication submission.  
35  
36  
37  
38  
39  
40  
41  
42  
43  
44  
45  
46  
47  
48  
49  
50  
51  
52  
53  
54  
55  
56  
57  
58  
59  
60

## Changing incidence of reported viral hepatitis in China from 2004 to 2016

### Abstract:

**Objective:** China's hepatitis burden is high in the world. This study aim to provide a detailed national-level description of the reported incidence of viral hepatitis in China during 2004 -2016.

**Design:** Observational study

**Setting:** Data were obtained from China's National Notifiable Disease Report System, reported trends were estimated by Joinpoint regression analysis

**Participants:** In this system, 16,927,233 patients with viral hepatitis during 1995–2015 were identified

**Primary outcome measure:** Incidence rates per 100 000 person-years and 95% CIs were calculated.

**Results:** There were 16,927,233 new cases of viral hepatitis reported in China from 2004 to 2016. Hepatitis B (n=13,543,137, 80.00%) and hepatitis C (n=1,844,882, 10.90%) accounted for >90% of cases. Overall APC of reported cases of viral hepatitis and hepatitis B were 0.3% (95% CI -2.0 to 0.8, P=0.6), and -0.2% (95% CI -1.6 to 1.2, P=0.8), respectively, a stable trend. HBV rates were highest in the 20-29 age group and lowest in younger ages, consistent with the universal HBV vaccination. Reported incidence of HCV and HEV showed increased trends, the APC was 14.5% (95% CI 13.1 to 15.9, P<0.05) and 4.7% (95% CI 2.8 to 6.7, P<0.05), respectively. Hepatitis A reporting decreased, APC was -13.1% (95% CI -15.1 to -11.0, P<0.05). There were marked differences in the reporting of hepatitis amongst provinces.

**Conclusions:** Hepatitis B continue to constitute the majority of viral hepatitis cases in China. Over the entire study period, HBV reporting was stable, HCV and HEV increased, while HAV decreased. There were significant interprovincial disparities in the burden of viral hepatitis with higher rates in economically less developed areas. Vaccination is important for viral hepatitis prevention and control.

## Strengths and limitations of this study

- ▶ Latest comprehensive descriptions of trends in the national and provincial reporting incidence for viral hepatitis in China, since 2004, were provided.
- ▶ Highlights the magnitude and importance of viral hepatitis in China, provide key data to help determine where efforts need to be focused.
- ▶ We analysed age distribution among different types of viral hepatitis, provided the prevalence characteristics of viral hepatitis in China.
- ▶ Since the studies collected data almost across the whole country, heterogeneity across reporting centers were existed, which might be the weakness.

## Introduction

Viral hepatitis is an important challenge to public health globally. In 2013, the greatest number of deaths and disability-adjusted life years (DALYs) attributable to viral hepatitis, occurred in East and South Asia, including China.[1] According to WHO, approximately 100 million people in China – that's 1 in 13 people – are living with chronic HBV and HCV infection.[2] In 2016, the WHO approved the first global health sector strategy on viral hepatitis, with the goal of eliminating viral hepatitis as a major public health threat by 2030.[3] To achieve this goal, a review of the current status of viral hepatitis and the different types was essential. Since Age distribution is an important for obtaining a clear understanding of changing trends in viral hepatitis reporting, and its future burden. China is a vast and diverse country with 32 provinces, province-level data are also required for effective disease prevention, control and management. Therefore, the present study examined the reported rates of newly diagnosed cases of viral hepatitis and documented temporal trends across age groups and provinces.

## Materials and Methods

In 2004, the Chinese government established a centralized web-reporting system for notifiable infectious diseases and public health emergencies. The fundamental database for this project was

1  
2  
3  
4 maintained by the Chinese Communicable Disease Control (CCDC). A standardized case reporting  
5 form (CRF) was established for the collection of demographic and diagnostic information for each  
6 case afflicted by reportable diseases (Appendix Table1).  
7  
8  
9

10 We collected data for viral hepatitis between 2004 and 2016 from the Center's website  
11 [4,5] and the Health Yearbooks.[6] In this system, cases were defined with diagnostic criteria  
12 issued by the law on the prevention and control of infectious diseases of the People's Republic of  
13 China in 2004.(Appendix Table2). Based on patient histories, clinical manifestations, and  
14 laboratory test results, cases were categorized as hepatitis A, B, C, E and unidentified hepatitis. [7]  
15  
16 In this research, unidentified hepatitis cases were excluded. For provincial analyses, Hong Kong,  
17 Macao and Taiwan were not enrolled in this research.  
18  
19  
20  
21  
22  
23  
24

25 Incidence (per 100,000) was defined as the number of annual newly diagnosed cases divided  
26 by the population size. What should be mentioned that, in this surveillance system the cases were  
27 newly diagnosed rather than new infections, to avoid misunderstanding, we used reported  
28 incidence in this research.  
29  
30  
31  
32

### 33 **Statistical analysis**

34  
35  
36 Descriptive epidemiological methods were used to examine and analyze reported data. APC  
37 (*Annual percent change*), AAPC (*Average annual percent change*) and 95% confidence intervals  
38 (CI) were calculated for viral hepatitis overall and for individual categories of viral hepatitis (A, B,  
39 C, and E). Additionally, we investigated trends and made comparisons among different provinces  
40 by heatmap. For age distributions, cases were divided annually into 10 groups for each category of  
41 viral hepatitis. Joinpoint regression models were used to describe temporal trends in the reporting  
42 of newly diagnosed cases. In describing trends, we used the terms "increase" and "decrease" when  
43 the slope (APC) was significant (two-tailed  $P < 0.05$ ). The term "stable" refers to a non-significant  
44 annual percent change ( $P \geq 0.05$ ) and indicates the incidence was maintained at a perennially  
45 stable level. R language (version 3,3.0) and Joinpoint (version 4.6.0.0, April,2018, IMS, Inc.,  
46 <https://surveillance.cancer.gov/joinpoint/>) were used in this study. The conduct of this study was  
47 consistent with the Declaration of Helsinki.  
48  
49  
50  
51  
52  
53  
54  
55  
56  
57  
58  
59  
60

## Patient and public involvement

No patients were involved in developing the research question or the outcome measures, no patients were involved in planning the design, recruitment to and conduct of the study. The data were collected from the on-line reporting system, patients were anonymous, we are unable to disseminate the results of the research directly to study participants.

## Results

### National and Provincial reporting incidence of viral hepatitis

#### National reporting incidence

Between 2004 and 2016, a total of 16,927,233 newly diagnosed cases of viral hepatitis were reported in China. Hepatitis B (n=13,543,137, 80.00%) and hepatitis C (n=1,844,882, 10.90%), jointly accounted for over 90% of cases. The remaining cases consisted of the following: 595,982 (3.52%) hepatitis A and 300,505 (1.78%) hepatitis E. (Figure 1)

Viral hepatitis reporting incidence increased from 85.49/100,000 in 2004 to 108.44/100,000 in 2007 ( $P<0.05$ ). After 2007, there was a significant downward trend to 89.11/100,000 in 2016 ( $P<0.05$ ). Overall, the APC was 0.3% (95% CI -2.0 to 0.8,  $P=0.6$ ), indicating a stable trend. (Appendix Figure 1.1)

Reporting incidence for hepatitis B increased from 2004 (67.96/100,000) to 2009 (88.82/100,000), and then decreased in 2016 (68.74/100,000). From 2004 to 2007, the APC was 10.3% (95% CI 4.1 to 16.9,  $P<0.05$ ), while from 2007 to 2016, the APC was -3.5% (95% CI -4.5 to -2.5,  $P<0.05$ ). Overall, the APC of hepatitis B was -0.2% (95% CI -1.6 to 1.2,  $P=0.8$ ), indicated a stable trend (Appendix Figure 1.2).

Reporting incidence for HCV increased from 2004 (2.92/100,000) to 2016 (15.09/100,000). From 2004 to 2007, the APC was 34.4% (95% CI 27.7 to 41.3,  $P<0.05$ ), indicating a significant increase. Thereafter, the APC from 2007 to 2012 was 15.9% (95% CI 13.6 to 18.2,  $P<0.05$ ),



1  
2  
3  
4 indicating a significant but slower increase, and from 2012 to 2016, the APC was 0.1% (95% CI  
5 -1.5 to 1.7,  $P=0.9$ ), indicating a stable trend. Overall, the APC was 14.5% (95% CI 13.1 to 15.9,  
6  $P<0.05$ ), indicating an increased trend (Appendix Figure1.3).  
7  
8

9  
10 For hepatitis A, the reporting incidence decreased from 2004 (6.94/100,000) to 2016  
11 (1.55/100,000). The APC for the entire period was -13.1% (95% CI -15.1 to -11.0,  $P<0.05$ )  
12 (Appendix Figure1.4). For hepatitis E, reporting incidence increased from 1.22/100,000 in 2004 to  
13 2.18/100,000 in 2011, with the APC of 8.1% (95% CI 5.2 to 11.0,  $P<0.05$ ). From 2011 to 2016,  
14 they decreased to 2.04/100,000, APC was stable (0.3%; 95% CI -3.4 to 4.1,  $P=0.9$ ). Overall, the  
15 APC for hepatitis E was 4.7% (95% CI 2.8 to 6.7,  $P<0.05$ ), indicating an increasing trend  
16 (Appendix Figure1.5).  
17  
18  
19  
20  
21  
22  
23

24  
25 Detailed information of Joinpoint analysis results are provided in Appendix Table 3.  
26

### 27 **Reporting incidence in relation to age**

28  
29  
30 Marked differences in the reporting incidence of hepatitis B were evident amongst the various age  
31 groups. Overall, HBV reporting incidence were highest in the 20-29 age group. When divided into  
32 those 20-25 and 26-29 years of age, the highest incidence were in the 26-29 group. The lowest  
33 reporting incidence of viral hepatitis occurred in the age group between 1 and 9 years old. In terms  
34 of trends from 2004 to 2013, the ages “<1”, “30-39”, “40-49” were stable, while those “1-9”,  
35 “10-19”, “20-29” decreased. Reporting incidence for all subjects over the age of 50 increased.  
36 More recently (beyond 2007), most age groups showed a significant decrease or stable trend,  
37 however, the trend increased in the “50-59” age group. (Figure 2)  
38  
39  
40  
41  
42  
43  
44  
45

46 For hepatitis C, aside from the <1 age group, reporting incidence in the different age groups  
47 increased with age. The highest reporting incidence were in those >80 years and the lowest in  
48 those between 1 and 19 years of age. From 2004 to 2013, each age group showed an increasing  
49 trend but more recently (beyond 2011) rates were stable in the “10-19”, “30~39”, “30~49” age  
50 groups. (Figure 3)  
51  
52  
53  
54  
55

56 For hepatitis A, the highest reporting incidence were in the “1~9” age group with incidence  
57  
58  
59  
60

1  
2  
3  
4 in the “5-9” group being higher than the “1-4” age group. The lowest reporting incidence was in  
5  
6 the “Age<1” group. In terms of trends, incidence in the “5~9” group were stable as were those in  
7  
8 the “10~29” age group after 2007. All the other age groups showed decreasing trends during this  
9  
10 period. (Figure 4)

11  
12 For hepatitis E, the highest reporting incidence were in the older age group (60-79 years).  
13  
14 Aside from the “1~9” age group, where incidence was stable and the “Age>=80” where incidence  
15  
16 decreased after 2011, the other age groups showed increasing trends during this period. (Figure 5)

17  
18  
19 More detailed information is provided in Appendix Table 4.

## 20 21 22 **Provincial incidence**

23  
24 In 2015, analysis of reporting incidence for viral hepatitis demonstrated that Xinjiang was the  
25  
26 province with the highest rates (>200/100,000). Qinghai, Hainan, Guangdong, Shanxi, Fujian,  
27  
28 Hubei, Inner Mongolia, Guangxi, and Hunan provinces had intermediate rates (>100 and  
29  
30 <200/100,000); while Shanghai, Heilongjiang, Zhejiang, Jiangsu, Tianjin, Beijing had the lowest  
31  
32 rates (<50/100,000). Specific analyses for hepatitis B and hepatitis C by province are provided in  
33  
34 Appendix Figure 2.

35  
36  
37 To document trends in reporting incidence for viral hepatitis from 2004 to 2015 by provinces,  
38  
39 data and a heatmap of reporting incidence for viral hepatitis in general as well as for the different  
40  
41 viruses are provided in Appendix Figure 3,4. For most provinces, reporting incidence for hepatitis  
42  
43 A have decreased, while those for hepatitis C have increased. Most northern areas of China  
44  
45 (Beijing, Tianjin, Hebei, Liaoning, Jilin, Heilongjiang) had decreasing incidence of hepatitis E  
46  
47 reporting, while the other provinces (Jiangxi, Shandong, Hubei, Guangxi, Hainan, Chongqing,  
48  
49 Sichuan, Guizhou, Yunnan) revealed increasing trends.

## 50 51 52 53 54 **Discussion**

55  
56  
57 Viral hepatitis is a significant global public health issue, it is responsible for an estimated 1.4  
58  
59

1  
2  
3  
4 million deaths per year from acute infection and hepatitis-related liver cirrhosis and cancer. Of  
5 those deaths, approximately 47% are attributable to hepatitis B, 48% hepatitis C and the remainder,  
6 hepatitis A and hepatitis E infections.[1] In 2015, an estimated 257 million people were living  
7 with chronic HBV infections and 71 million chronic HCV infections.[8] China's hepatitis burden  
8 is the highest in the world: according to WHO, one-third of the world's 240 million people living  
9 with chronic HBV are in China, while approximately 7% of the world's 130-150 million people  
10 living with HCV are in China [2].  
11  
12  
13  
14  
15  
16  
17

18 In this study, HBV reporting incidence were lowest in children under 10 years of age and  
19 highest in the "20~29" age group. Similar results have been reported previously. [9] Further  
20 analysis of the "20-29" age group revealed that those "25-29" years of age (i.e. born in 1975-1988)  
21 had significantly higher reporting incidence than the "20-24" age group, suggesting a possible  
22 vaccine effect. Indeed, the hepatitis B vaccine was first introduced into China in 1985, and  
23 integrated into the National Expanded Program on Immunization (EPI) in 1992[10]. Thus, the  
24 majority of individuals in the "25-29" age group were born in a period without HBV vaccine  
25 protection and hence, susceptible to transmission via the maternal-infant route. Of note, HBV  
26 reporting in individuals older than 50 years, showed an increase from 2004 to 2013. This could be  
27 explained by: (1) the elderly being more likely to establish contact with the health care system. (2)  
28 A higher prevalence of chronic HBV and therefore, greater likelihood of presenting with  
29 complications such as portal-hypertensive bleeding, encephalopathy, ascites, jaundice or HCC  
30 leading to diagnosis of HBV-related disease. (3) Behaviors like sexual contact, invasive medical  
31 procedures, sharing shavers and towels with HBV carriers were independent risk factors for acute  
32 hepatitis B, which is an important way for HBV transmission in adult. (4) Older groups didn't  
33 have vaccine protection in the early age, they would be more easier to be infected with HBV, after  
34 successfully vaccination for children, to decrease the prevalence of HBV, vaccination among  
35 people aged from 15~59 years old should also be conducted. [11]  
36  
37  
38  
39  
40  
41  
42  
43  
44  
45  
46  
47  
48  
49  
50  
51  
52  
53

54 Regarding hepatitis C, reporting incidence increased with age, the lowest incidence occurred  
55 in children and adolescents, while the highest incidence was documented in the "Age $\geq$ 80" group.  
56 However, from 2004 to 2013, reporting incidence increased in all age groups, which likely reflects  
57  
58  
59  
60

1  
2  
3  
4 increased disease awareness, older individuals seeking medical care, increases in new infections,  
5  
6 progression to complications of cirrhosis, and adopting new generation HCV testing[8,12,13]. Of  
7  
8 note, in China, the implementation of HCV screening of blood donors and products occurred in  
9  
10 1993,[14] and associated with this intervention was a decline in transfusion-related HCV from 72%  
11  
12 to 47%.[13] However, relatively high rates of HCV infections among patients undergoing  
13  
14 hemodialysis and other invasive therapies and high-risk sexual behaviours remain a potential  
15  
16 source for HCV transmission.[15] While the success achieved with recent directing antiviral  
17  
18 agents (DAA) for chronic HCV predict further declines in HCV reporting, complete eradication of  
19  
20 HCV might not be possible without an effective vaccine.[16]

21  
22 Provincial analyses demonstrated large differences in reporting incidence for viral hepatitis in  
23  
24 various provinces. Specifically, Xinjiang and Qinghai provinces had the highest incidence of viral  
25  
26 hepatitis in general and hepatitis B and hepatitis C in particular, while incidence were lowest in  
27  
28 Shanghai, Zhejiang, Jiangsu, Tianjin and Beijing. These findings suggest that viral hepatitis is  
29  
30 more prevalent in less economically developed areas, where health care resources and awareness  
31  
32 of public health suboptimal.

33  
34 During this period, for hepatitis A, the highest reported incidence was found in “1~9” age  
35  
36 group. For hepatitis E, the highest reported incidence was in the older age groups (between 60 to  
37  
38 79 years old), similar results as Ren’s Research.[17] Heatmap analysis of changing trends within  
39  
40 the provinces documented that hepatitis A reporting has decreased. This finding likely reflects the  
41  
42 impact of effective HAV vaccination (a live attenuated hepatitis A vaccine was introduced in 1992  
43  
44 and incorporated into the Expanded Program of Immunization in 2008).[18] Regarding reporting  
45  
46 incidence for hepatitis C and hepatitis E in most provinces, the increased trends might be ascribed  
47  
48 to a lack of effective vaccines, more wide-spread application of HCV testing, and more sensitive  
49  
50 and specific hepatitis E diagnostics.[19] Also potentially important is the increased insurance  
51  
52 coverage and patient reimbursement in China, resulting in increased exposure of large segments of  
53  
54 the population to the health care system.[20] Indeed, between 2003 and 2011, insurance coverage  
55  
56 increased from 30% to 96% and physical access to health services was achieved for 83% of the  
57  
58 general population.

1  
2  
3  
4 There are certain limitations to this study that warrant emphasis. First, protocols were not in  
5 place to evaluate data quality and consistency across reporting centers. Second, it is unknown  
6 which diagnostic tests and when those tests were introduced into the various laboratories  
7 throughout the country. Third, the distinction between acute and recently identified chronic  
8 infections was difficult and in some cases, not possible. Fourth, certain demographic  
9 characteristics were not provided in this web-site system, therefore, trends in gender reporting  
10 could not be ascertained.  
11  
12  
13  
14  
15  
16

17  
18 In conclusion, this study underscores the magnitude of viral hepatitis reporting in China.  
19 Overall reporting of new cases of viral hepatitis and hepatitis B have been stable. Hepatitis B  
20 infections continue to be the most commonly reported hepatotropic virus, but the minimal  
21 reporting in the young underscore the value of the HBV vaccine. Similarly, HAV reporting which  
22 had mainly occurred in children and adolescents has decreased with the introduction of HAV  
23 vaccination. HCV and HEV reporting was relatively higher among the elderly and increased  
24 during the study period. Thus, for these viruses, increased awareness and effective vaccines are  
25 urgently needed.  
26  
27  
28  
29  
30  
31  
32  
33  
34  
35  
36

### 37 **Acknowledgments:**

38  
39 We thank the physicians, doctors, and the staff of the CDC for their work on data collection. The  
40 authors also wish to thank Professor Fujie Xu, Division of Viral Hepatitis, National Center for  
41 HIV, Viral Hepatitis, STD, and TB Prevention (NCHHSTP), Centers for Disease Control and  
42 Prevention (CDC), Atlanta, USA, and Dr. Lan Zhang, Gilead Sciences Shanghai Pharmaceutical  
43 Technology Company, China, for the helpful comments and valuable suggestions. All authors  
44 have no association that might pose a conflict of interest.  
45  
46  
47  
48  
49  
50  
51

### 52 **Potential conflicts of interest:**

53  
54 The authors declare no conflicts of interest.  
55  
56  
57

### 58 **Data sharing statement:**

No additional data available.

### **Funding:**

This work was supported by the National Science and Technology Major Project [2014ZX10002002] and Program for JLU Science and Technology Innovative Research [No.2017TD-08] and Fundamental Research Funds for the Central Universities [No.2017TD-08].

### **Figures:**

**Figure 1.** Report cases of viral hepatitis in total and its different categories

**Figure 2.** Reported incidence of hepatitis B from 2003 to 2013

**Figure 3.** Reported incidence of hepatitis C from 2003 to 2013

**Figure 4.** Reported incidence of hepatitis A from 2003 to 2013

**Figure 5.** Reported incidence of hepatitis E from 2003 to 2013

### **References**

1. Stanaway JD, Flaxman AD, Naghavi M, et al. The global burden of viral hepatitis from 1990 to 2013: findings from the Global Burden of Disease Study 2013. *Lancet* 2016;**388**(10049):1081-88 doi: 10.1016/S0140-6736(16)30579-7[published Online First: Epub Date]].
2. Up to 10 million people in China could die from chronic hepatitis by 2030 – Urgent action needed to bring an end to the ‘silent epidemic’ .  
<http://www.wpro.who.int/china/mediacentre/releases/2016/20160727-china-world-hepatitis-day/en/> (accessed 15 Jan 2018)
3. World Health Organization. Global health sector strategy on viral hepatitis 2006-2021.2016.  
<http://www.who.int/hepatitis/strategy2016-2021/ghss-hep/en/>(accessed: 30 Aug 2016).
4. China Center for Disease Control and Prevention.  
[http://www.nhfpc.gov.cn/jkj/s3578/new\\_list.shtml](http://www.nhfpc.gov.cn/jkj/s3578/new_list.shtml)(accessed 15 Jun 2017).

- 1  
2  
3  
4 5. The Public Health Science Data Center.  
5  
6 <http://www.phsciencedata.cn/Share/edtShareNew.jsp?id=39104> (accessed Sep 15, 2018).  
7
- 8 6. National Health and Family Planning Commission of the People's Republic of China, Health  
9 and family planning statistical yearbook of China, Beijing, 2016.  
10
- 11 7. The national health and family planning commission of the People's Republic of China.  
12 Diagnostic criteria for infectious diseases regulated by the law on the prevention and control  
13 of infectious diseases of the People's Republic of China, 2004, Aug, 28th.  
14
- 15 8. World Health Organization. Global hepatitis report, 2017.  
16  
17 <http://www.who.int/hepatitis/publications/global-hepatitis-report2017/en/>,  
18  
19 (accessed: 30 Sep 2017).  
20
- 21 9. Yan YP, Su HX, Ji ZH, Shao ZJ, Pu ZS. Epidemiology of Hepatitis B Virus Infection in China:  
22 Current Status and Challenges. *Journal of clinical and translational hepatology* 2014;**2**(1):15-22  
23 doi: 10.14218/JCTH.2013.00030[published Online First: Epub Date].  
24
- 25 10. Chen Y, WF, Zheng H, et al. The Seroepidemiological Study and Vaccination Status Analysis on  
26 Viral Hepatitis B among Population Aged 1-59 Years in Six Areas of China in 2006. *CHINESE*  
27 *JOURNAL OF VACCINES AND IMMUNIZATION* 2012; 18(01): 14-8  
28  
29 ( <https://dwz.cn/Z3fcEUzM> ).  
30
- 31 11. Zhang G, Miao N, Zheng H, Sun X, Yin Z, Wang F. Incidence by age and region of hepatitis B  
32 reported in China from 2005 to 2016. *CHINESE JOURNAL OF VACCINES AND*  
33 *IMMUNIZATION* 2018;**24**(02):121-26 (<https://dwz.cn/xK6lJZ6U> ).  
34
- 35 12. Duan Z, Jia JD, Hou J, et al. Current challenges and the management of chronic hepatitis C in  
36 mainland China. *Journal of clinical gastroenterology* 2014;**48**(8):679-86 doi:  
37  
38 10.1097/MCG.000000000000109[published Online First: Epub Date].  
39
- 40 13. Rao H, Wei L, Lopez-Talavera JC, et al. Distribution and clinical correlates of viral and host  
41 genotypes in Chinese patients with chronic hepatitis C virus infection. *Journal of*  
42 *gastroenterology and hepatology* 2014;**29**(3):545-53 doi: 10.1111/jgh.12398[published Online  
43  
44 First: Epub Date].  
45
- 46 14. Cui Y, Jia J. Update on epidemiology of hepatitis B and C in China. *Journal of gastroenterology*  
47  
48  
49  
50  
51  
52  
53  
54  
55  
56  
57  
58  
59  
60

- 1  
2  
3  
4 and hepatology 2013;**28 Suppl 1**:7-10 doi: 10.1111/jgh.12220[published Online First: Epub  
5 Date]].  
6  
7  
8 15. Qin Q, Smith MK, Wang L, et al. Hepatitis C virus infection in China: an emerging public health  
9 issue. *Journal of viral hepatitis* 2015;**22**(3):238-44 doi: 10.1111/jvh.12295[published Online  
10 First: Epub Date].  
11  
12  
13 16. Bartenschlager R, Baumert TF, Bukh J, et al. Critical challenges and emerging opportunities in  
14 hepatitis C virus research in an era of potent antiviral therapy: Considerations for scientists and  
15 funding agencies. *Virus research* 2018;**248**:53-62 ;doi: 10.1016/j.virusres.2018.02.016[published  
16 Online First: Epub Date].  
17  
18  
19 17. Ren X, Wu P, Wang L, et al. Changing Epidemiology of Hepatitis A and Hepatitis E Viruses in  
20 China, 1990-2014. *Emerging infectious diseases* 2017;**23**(2):276-79. doi:  
21 10.3201/2302.161095[published Online First: Epub Date]].  
22  
23  
24 18. Fangcheng Z, Xuanyi W, Mingding C, et al. Era of vaccination heralds a decline in incidence of  
25 hepatitis A in high-risk groups in China. *Hepatitis monthly* 2012;**12**(2):100-5 doi:  
26 10.5812/hepatmon.838[published Online First: Epub Date]].  
27  
28  
29 19. Zhang Q, Tang G, Liu H, et al. Investigation on the causes of increased hepatitis E cases reported  
30 in Guizhou province. *Chinese Journal Epidemiology* 2015;**36**(3):228-31.  
31 doi:[10.3760/cma.j.issn.0254-6450.2015.03.008](https://doi.org/10.3760/cma.j.issn.0254-6450.2015.03.008)  
32  
33  
34 20. Meng Q, Xu L, Zhang Y, et al. Trends in access to health services and financial protection in  
35 China between 2003 and 2011: a cross-sectional study. *Lancet* 2012;**379**(9818):805-14 doi:  
36 10.1016/S0140-6736(12)60278-5[published Online First: Epub Date]].  
37  
38  
39  
40  
41  
42  
43  
44  
45  
46  
47  
48  
49  
50  
51  
52  
53  
54  
55  
56  
57  
58  
59  
60



1  
2  
3  
4  
5  
6  
7  
8  
9  
10  
11  
12  
13  
14  
15  
16  
17  
18  
19  
20  
21  
22  
23  
24  
25  
26  
27  
28  
29  
30  
31  
32  
33  
34  
35  
36  
37  
38  
39  
40  
41  
42  
43  
44  
45  
46  
47  
48  
49  
50  
51  
52  
53  
54  
55  
56  
57  
58  
59  
60

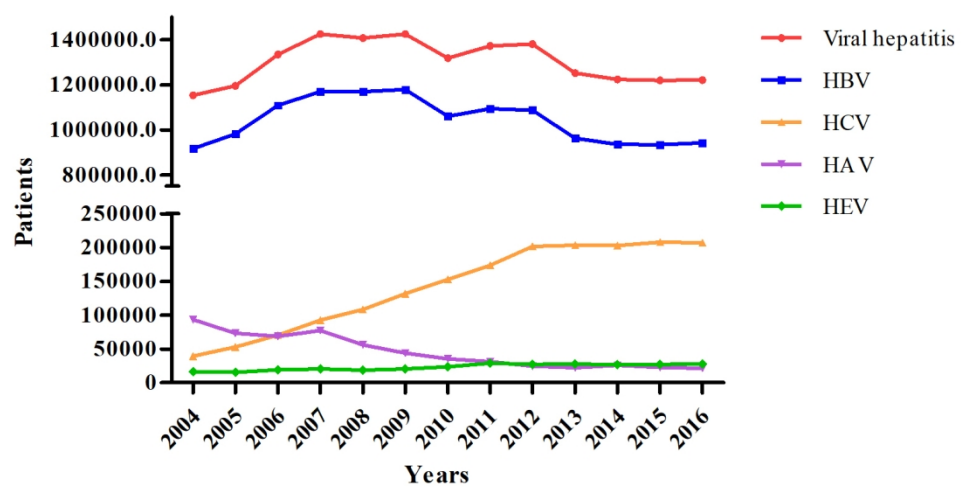

138x75mm (300 x 300 DPI)

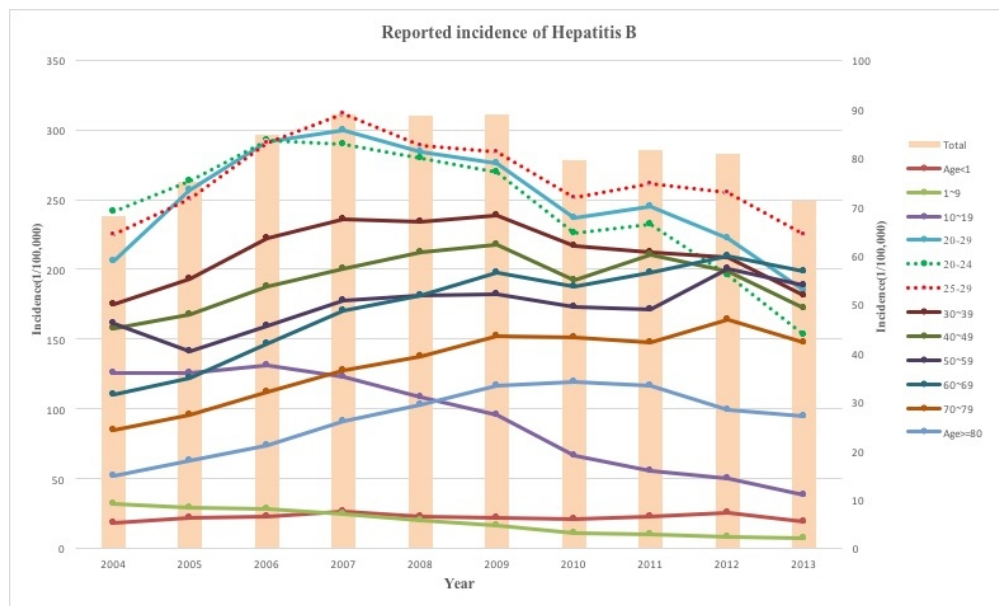

277x166mm (72 x 72 DPI)

1  
2  
3  
4  
5  
6  
7  
8  
9  
10  
11  
12  
13  
14  
15  
16  
17  
18  
19  
20  
21  
22  
23  
24  
25  
26  
27  
28  
29  
30  
31  
32  
33  
34  
35  
36  
37  
38  
39  
40  
41  
42  
43  
44  
45  
46  
47  
48  
49  
50  
51  
52  
53  
54  
55  
56  
57  
58  
59  
60

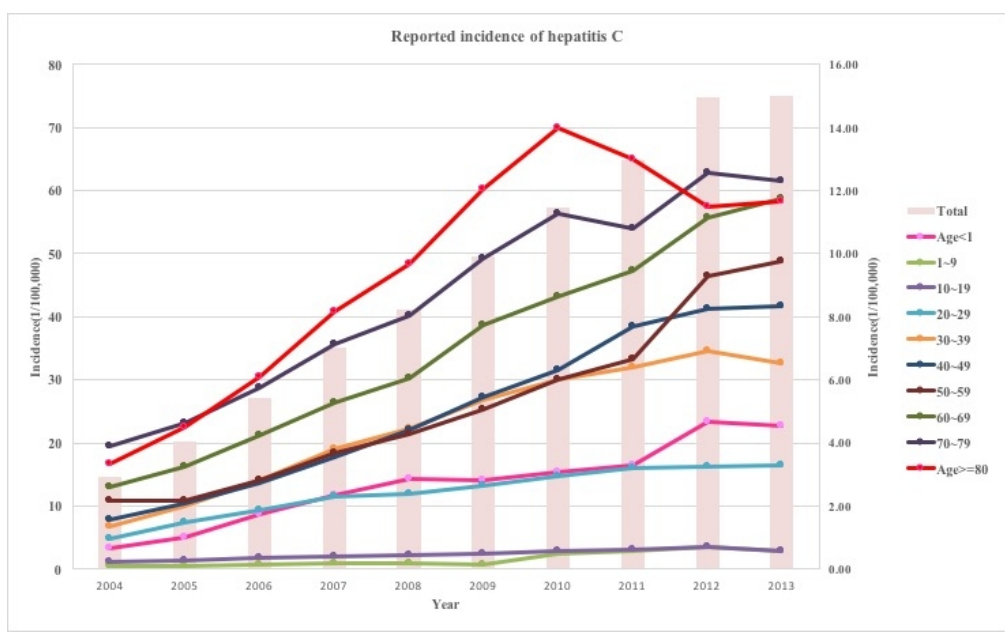

258x160mm (72 x 72 DPI)

1  
2  
3  
4  
5  
6  
7  
8  
9  
10  
11  
12  
13  
14  
15  
16  
17  
18  
19  
20  
21  
22  
23  
24  
25  
26  
27  
28  
29  
30  
31  
32  
33  
34  
35  
36  
37  
38  
39  
40  
41  
42  
43  
44  
45  
46  
47  
48  
49  
50  
51  
52  
53  
54  
55  
56  
57  
58  
59  
60

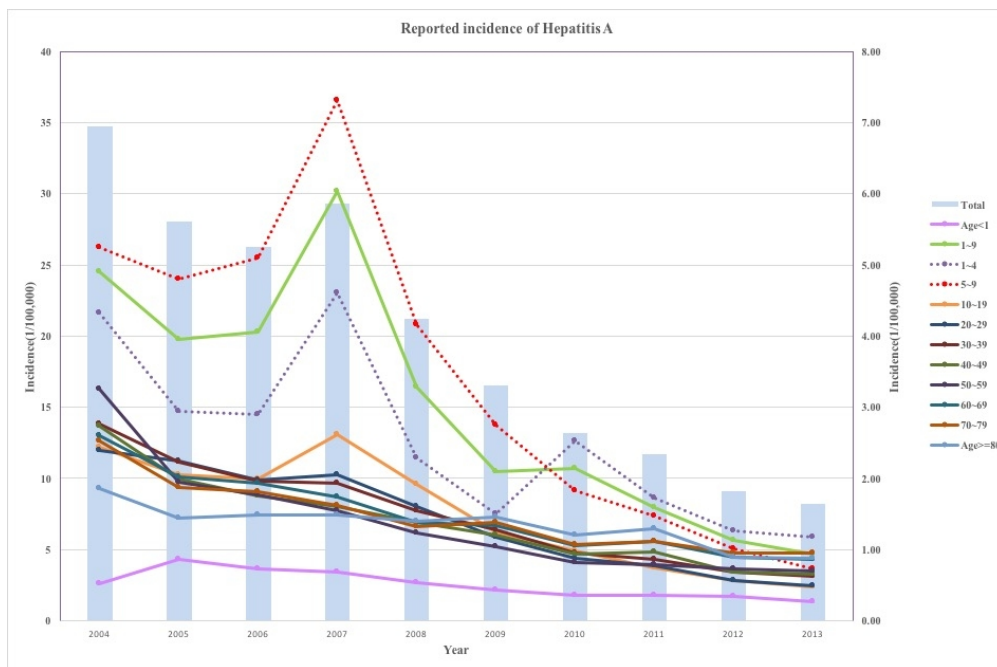

333x221mm (72 x 72 DPI)

1  
2  
3  
4  
5  
6  
7  
8  
9  
10  
11  
12  
13  
14  
15  
16  
17  
18  
19  
20  
21  
22  
23  
24  
25  
26  
27  
28  
29  
30  
31  
32  
33  
34  
35  
36  
37  
38  
39  
40  
41  
42  
43  
44  
45  
46  
47  
48  
49  
50  
51  
52  
53  
54  
55  
56  
57  
58  
59  
60

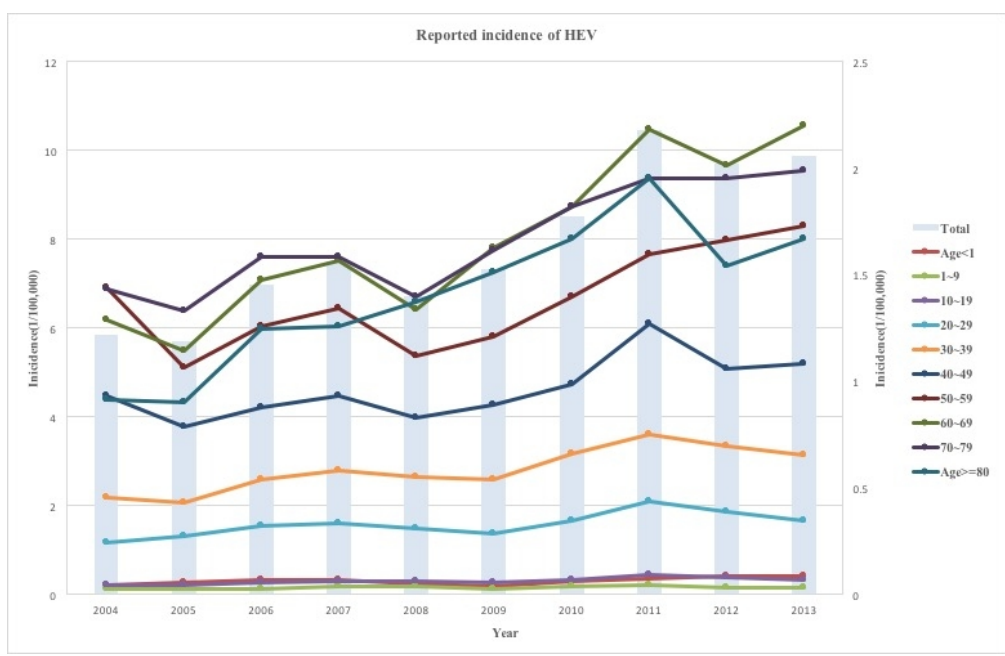

273x175mm (72 x 72 DPI)

Appendix Figure1. Joinpoint analysis of viral hepatitis and hepatitis B, hepatitis C, hepatitis A and hepatitis E

1.1 Viral hepatitis

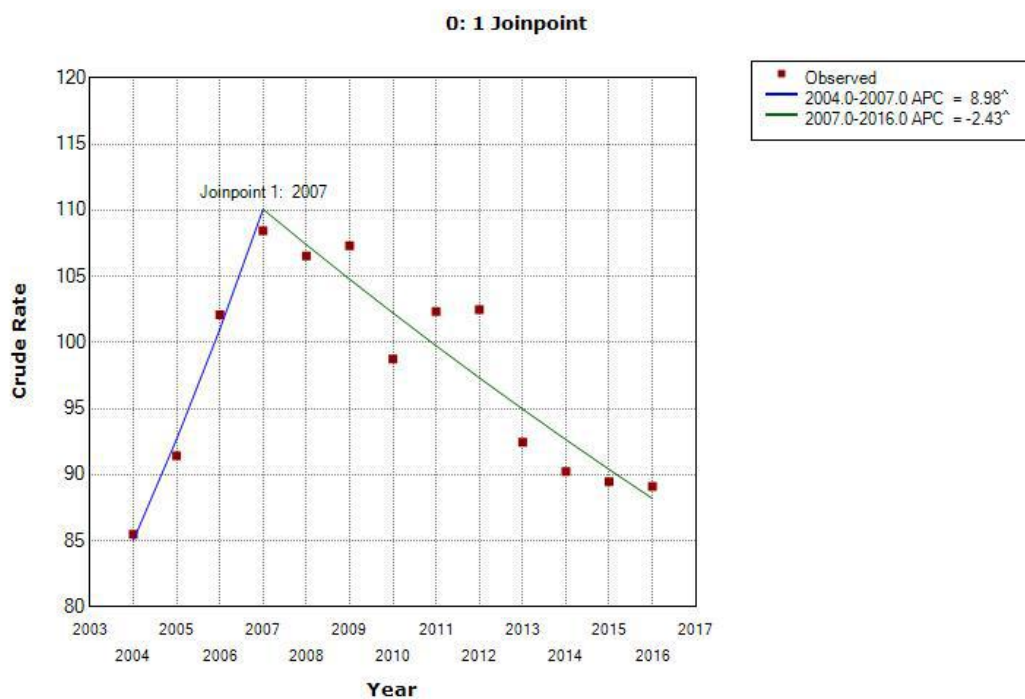

^ Indicates that the Annual Percent Change (APC) is significantly different from zero at the alpha = 0.05 level.  
Final Selected Model: 1 Joinpoint.

1.2 Hepatitis B

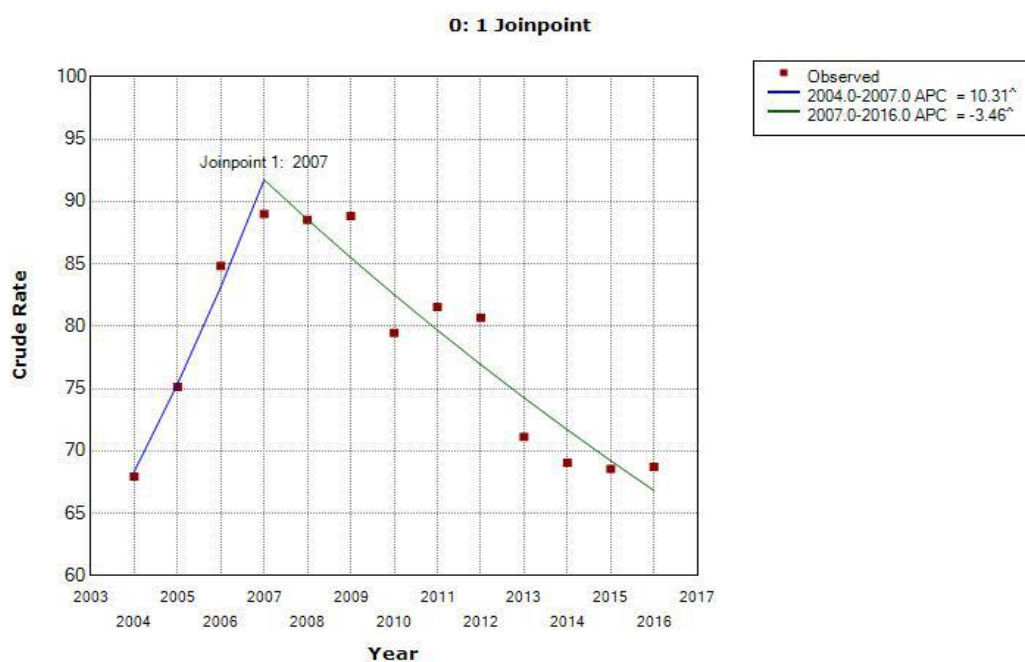

^ Indicates that the Annual Percent Change (APC) is significantly different from zero at the alpha = 0.05 level.  
Final Selected Model: 1 Joinpoint.

1.3 Hepatitis C

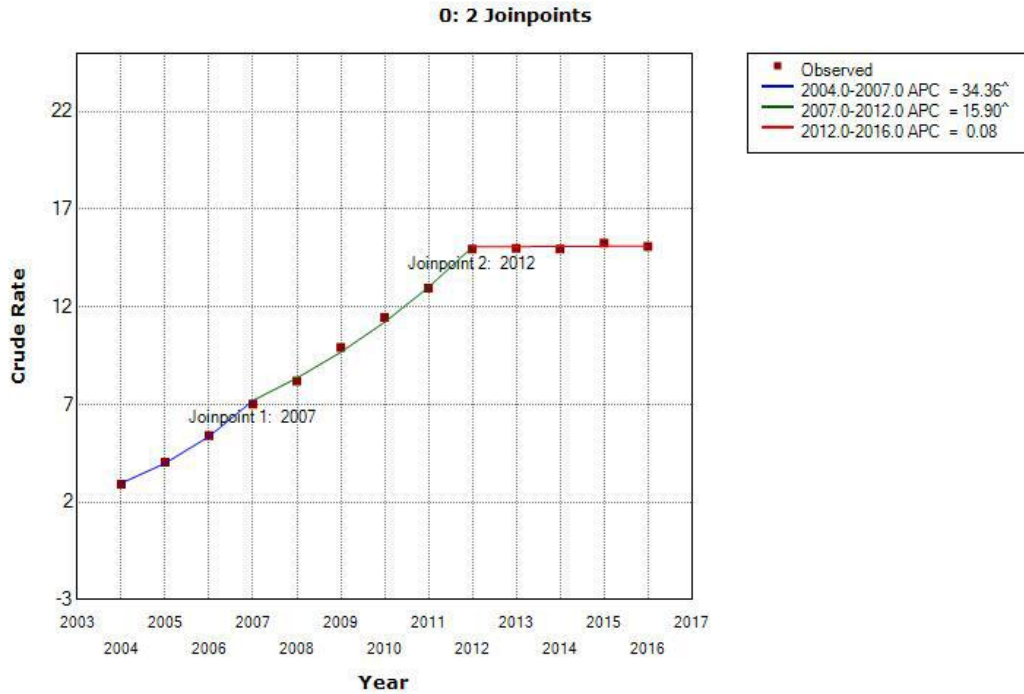

<sup>^</sup> Indicates that the Annual Percent Change (APC) is significantly different from zero at the alpha = 0.05 level.  
Final Selected Model: 2 Joinpoints.

1.4 Hepatitis A

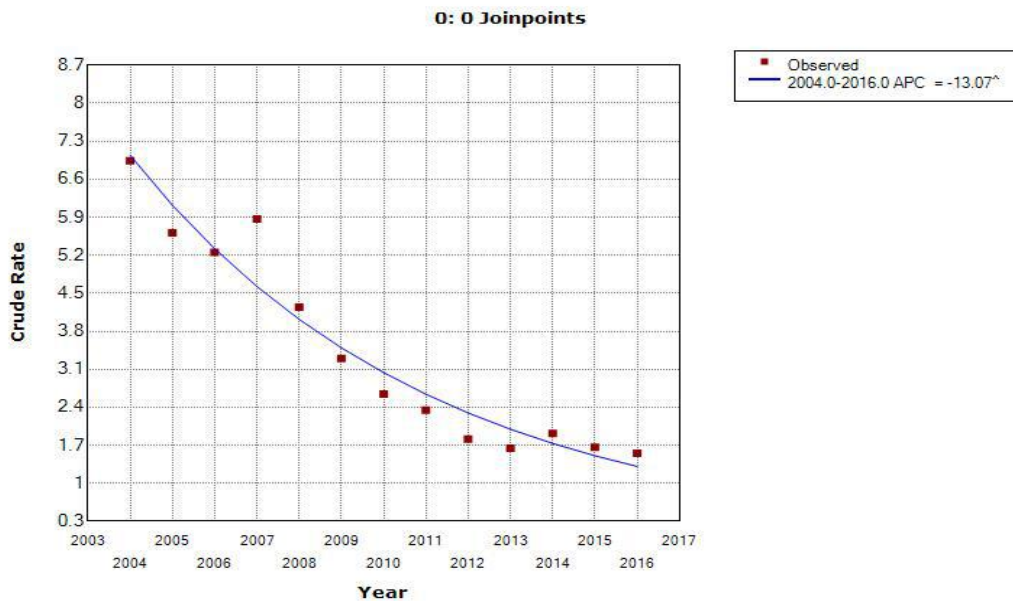

<sup>^</sup> Indicates that the Annual Percent Change (APC) is significantly different from zero at the alpha = 0.05 level.  
Final Selected Model: 0 Joinpoints.

1.5 Hepatitis E

0: 1 Joinpoint

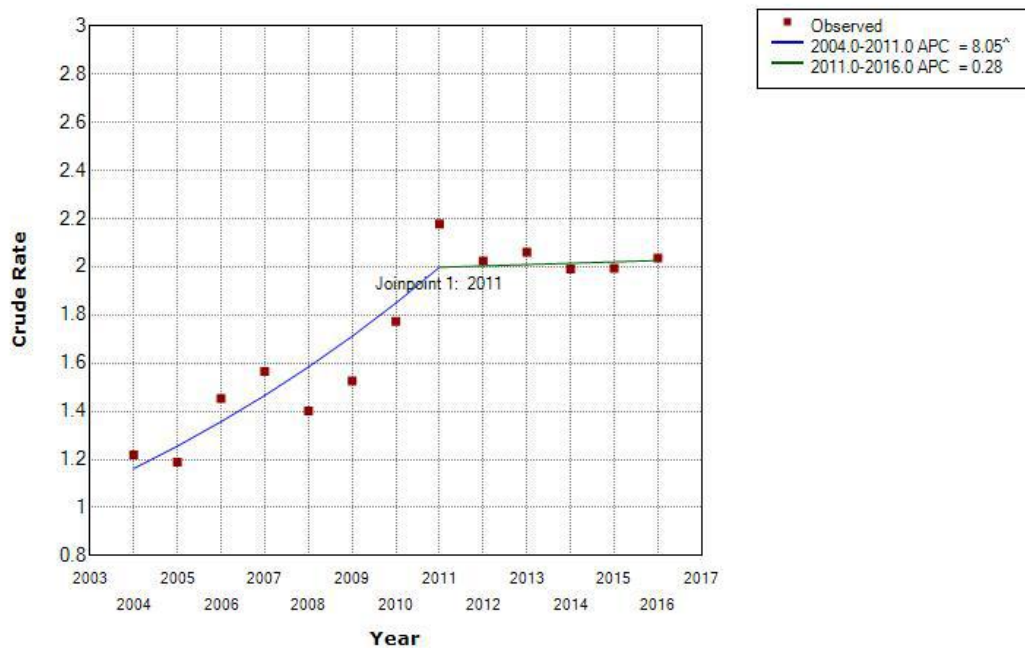

^ Indicates that the Annual Percent Change (APC) is significantly different from zero at the alpha = 0.05 level.  
Final Selected Model: 1 Joinpoint.

review only



Appendix Figure 2: Reported incidence of viral hepatitis(2A), hepatitis B(2B), and hepatitis C(2C) in different provinces of China, 2015

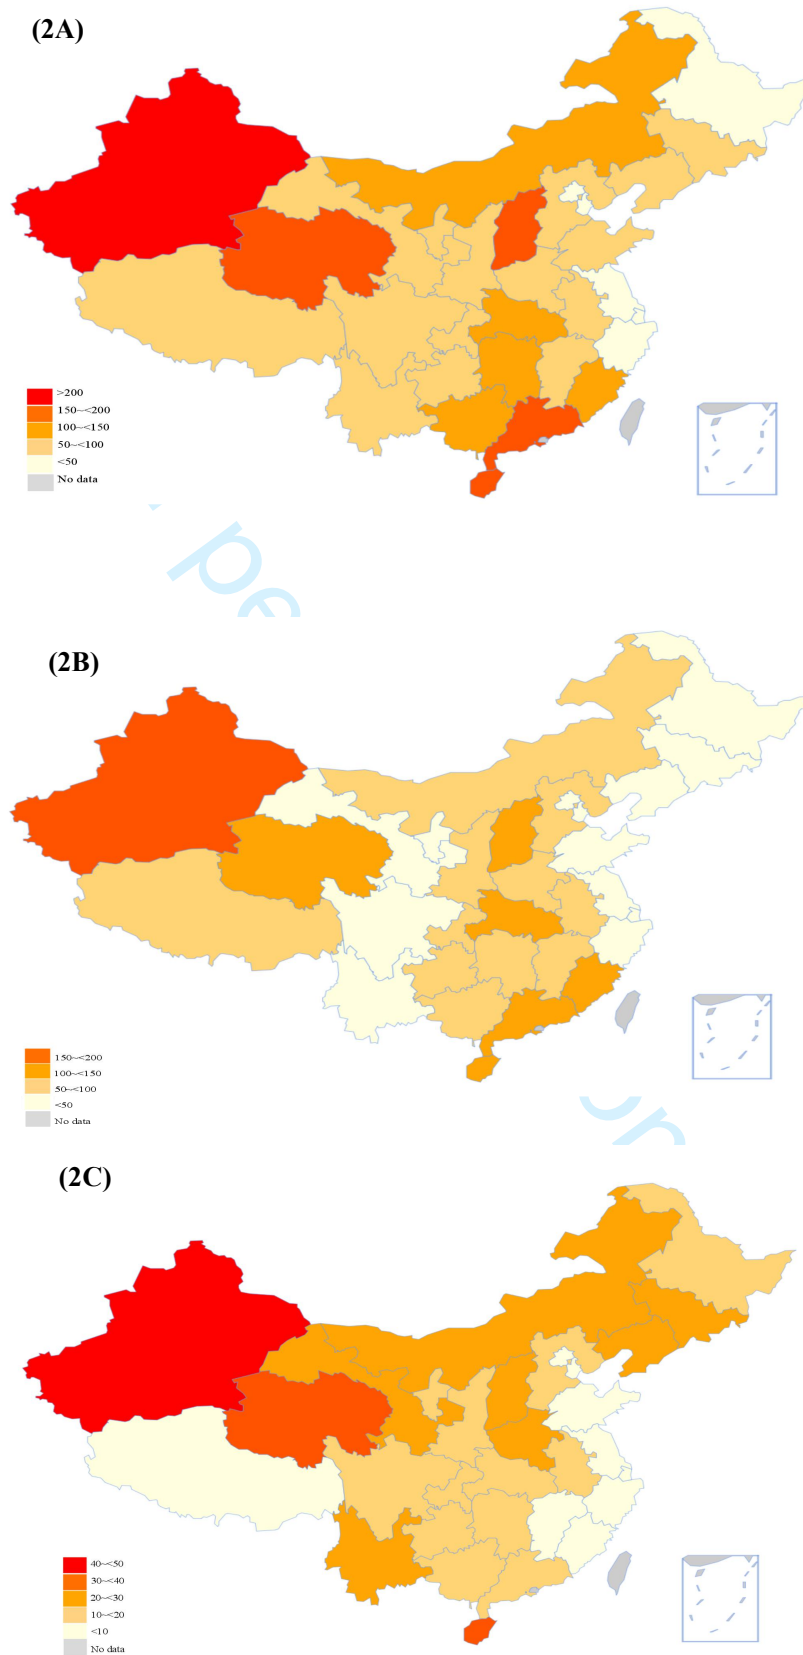

Data Source: National Health and Family Planning Commission of the People's Republic of China, Health and family planning

1  
2  
3 statistical Yearbook of China, Beijing, 2016  
4  
5  
6  
7  
8  
9  
10  
11  
12  
13  
14  
15  
16  
17  
18  
19  
20  
21  
22  
23  
24  
25  
26  
27  
28  
29  
30  
31  
32  
33  
34  
35  
36  
37  
38  
39  
40  
41  
42  
43  
44  
45  
46  
47  
48  
49  
50  
51  
52  
53  
54  
55  
56  
57  
58  
59  
60

For peer review only

Appendix Figure 3: Annual reported incidence of viral hepatitis overall in different provinces, China,2004-2015

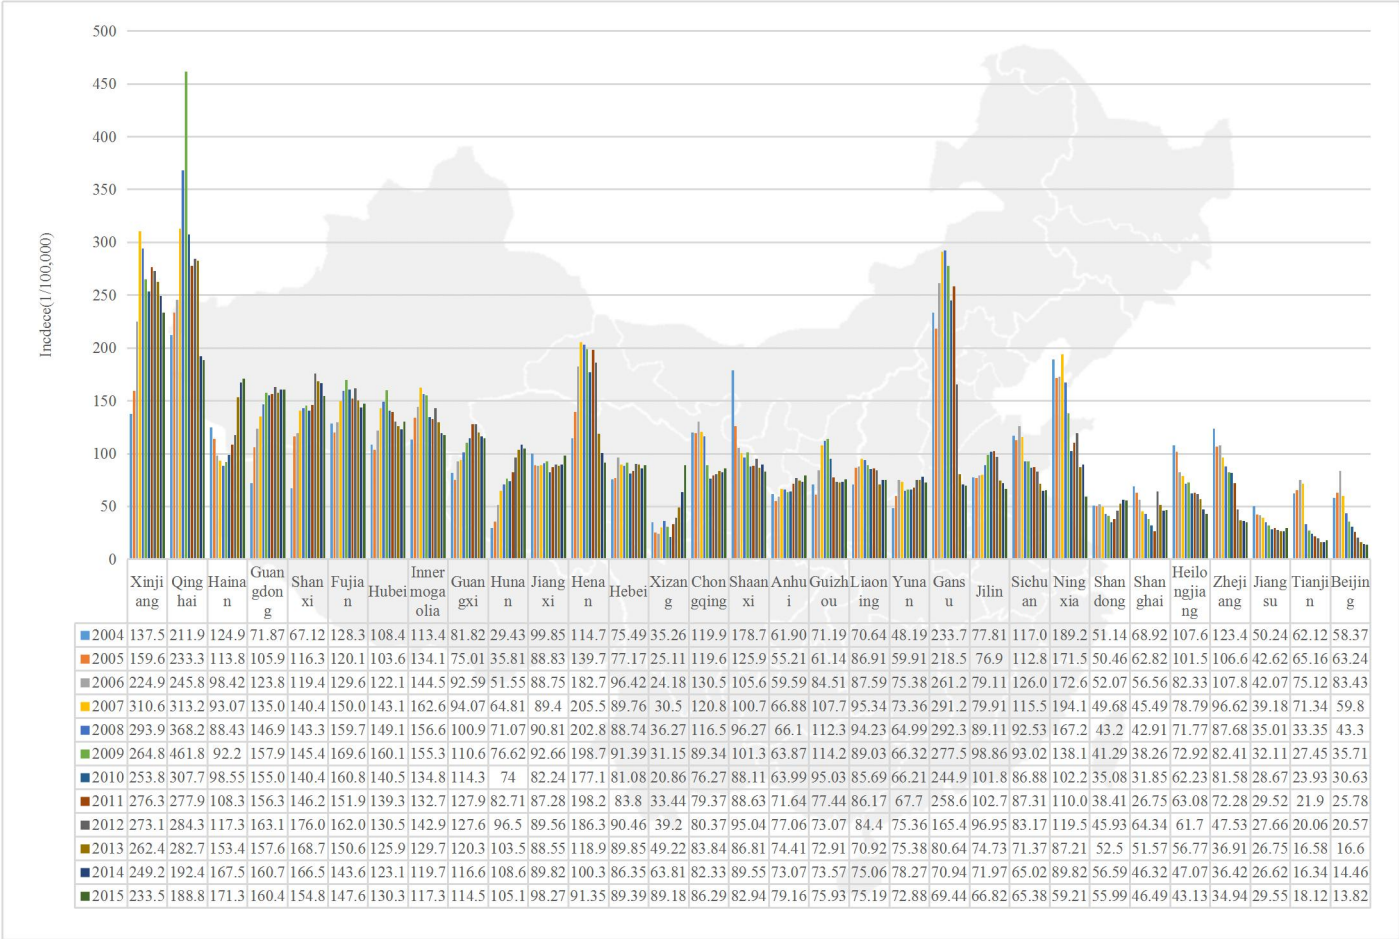

Data Source: China Center for Disease Control and Prevention. The Public Health Science Data Center. <http://www.phsciencedata.cn/Share/index.jsp>

Appendix Figure 4 Heatmap of annual reported incidence of viral hepatitis in total and by different types of hepatitis, different data provinces of China, 2004-2015

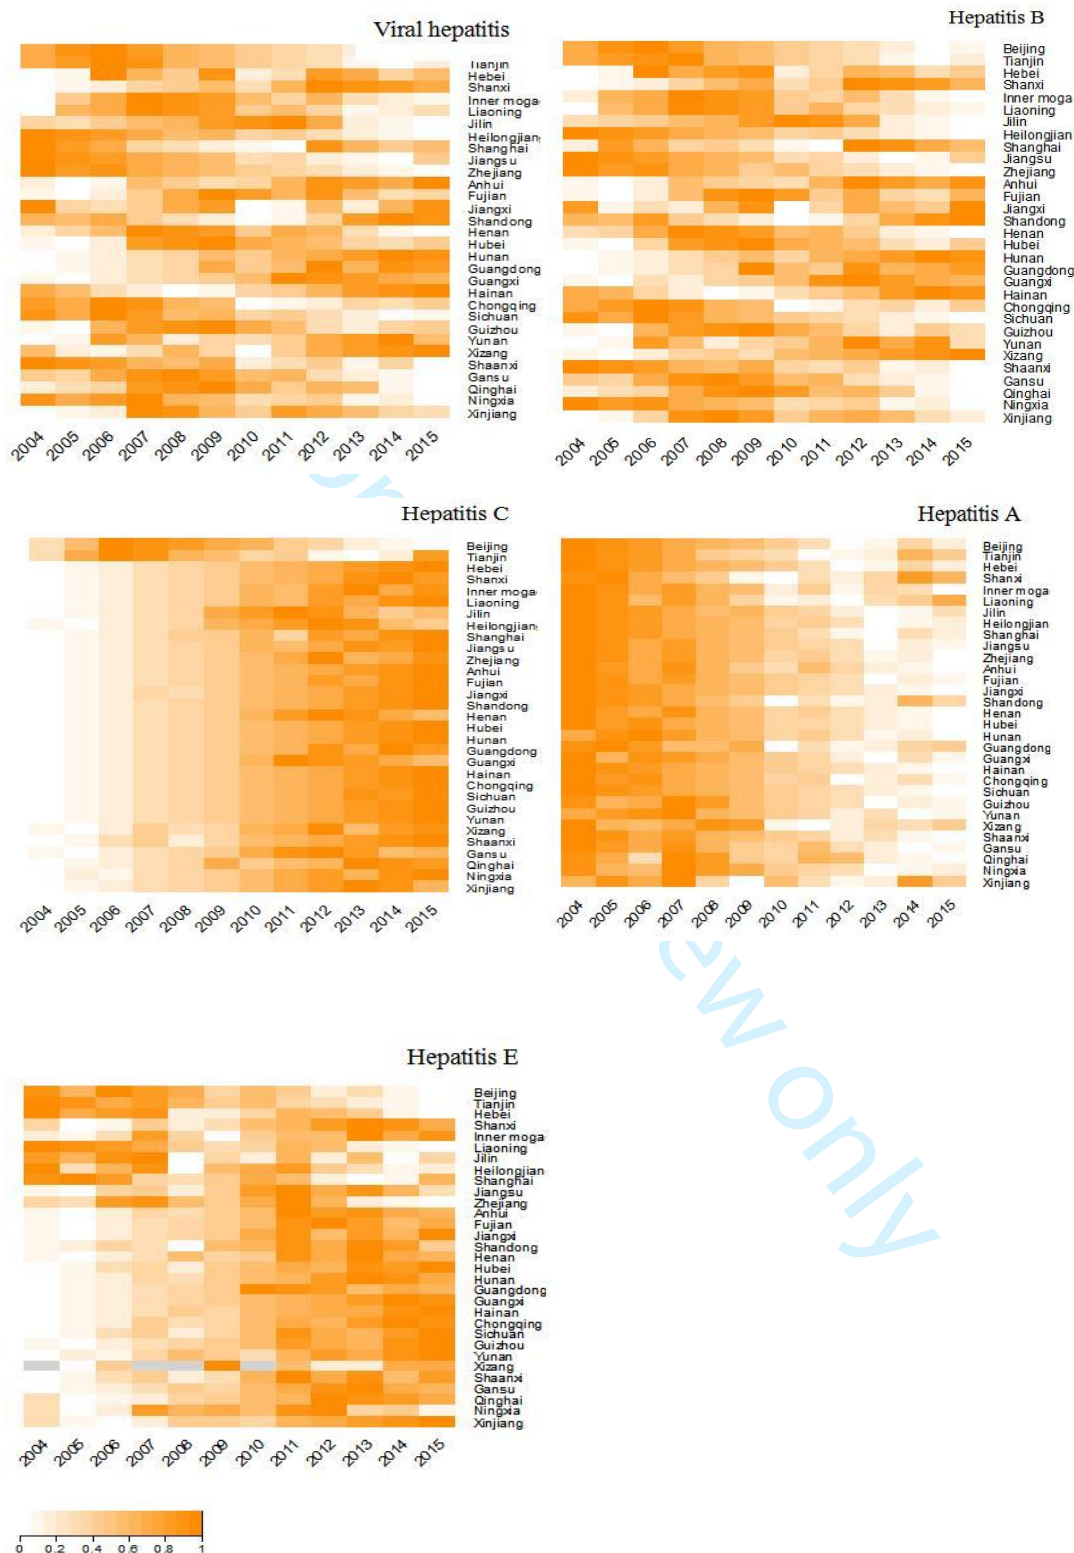

Lightgray: means that data were not available

Data Source: China Center for Disease Control and Prevention. The Public Health Science Data Center.

<http://www.phsciencedata.cn/Share/index.jsp>

**Appendix Table1.****Web-based Clinical reporting form(CRF)**

|                             |                          |                                       |                           |                      |                 |                 |
|-----------------------------|--------------------------|---------------------------------------|---------------------------|----------------------|-----------------|-----------------|
| Name:                       | Family member's Name:    | Date of birth:                        | Age:                      | Gender:              | Marital status: | Family address: |
| ID number:                  |                          | Telephone number:                     |                           | Occupation:          |                 |                 |
| Degree of education:        |                          | Nationality:                          |                           | Report disease name: |                 |                 |
| Classification of disease:  |                          | i: Clinical diagnosis                 |                           |                      |                 |                 |
|                             |                          | ii: Laboratory confirmation diagnosis |                           |                      |                 |                 |
|                             |                          | iii: Suspected cases                  |                           |                      |                 |                 |
|                             |                          | iv: Pathogen carriers                 |                           |                      |                 |                 |
| Dates of onset:             | Date of being diagnosed: |                                       | Methods of diagnose:      |                      | Date of death:  |                 |
| Date of completing the CRF: |                          |                                       | Name of reporting doctor: |                      |                 | Department:     |

Appendix Table2.

**Diagnostic criteria for viral hepatitis by the law on the prevention and control of infectious diseases of the People's Republic of China, 2004**

| Viral hepatitis             |                                                                                                                                                                                                                                                   |                                                                                                                                                                                                                                  |                                                                                                                                                |                                                                                                                                                                                                                     |
|-----------------------------|---------------------------------------------------------------------------------------------------------------------------------------------------------------------------------------------------------------------------------------------------|----------------------------------------------------------------------------------------------------------------------------------------------------------------------------------------------------------------------------------|------------------------------------------------------------------------------------------------------------------------------------------------|---------------------------------------------------------------------------------------------------------------------------------------------------------------------------------------------------------------------|
| <b>Clinical description</b> | (I).Recently, there has been a loss of appetite, nausea, refused fatty food, fatigue, jaundice, tea color urine, liver enlargement, liver pain, fatigue, etc, exclude other diseases;                                                             |                                                                                                                                                                                                                                  |                                                                                                                                                |                                                                                                                                                                                                                     |
| <b>Laboratory test</b>      | (II).Serum ALT elevated repeatedly and cannot be explained by other causes.                                                                                                                                                                       |                                                                                                                                                                                                                                  |                                                                                                                                                |                                                                                                                                                                                                                     |
| <b>Diagnose</b>             | Suspected cases:(I)+(II)                                                                                                                                                                                                                          |                                                                                                                                                                                                                                  |                                                                                                                                                |                                                                                                                                                                                                                     |
| <b>Classification</b>       | <b>Hepatitis A</b>                                                                                                                                                                                                                                | <b>Hepatitis B</b>                                                                                                                                                                                                               | <b>Hepatitis C</b>                                                                                                                             | <b>Hepatitis E</b>                                                                                                                                                                                                  |
| <b>Clinical description</b> | 1.One month (2-6 weeks) before the onset of illness, patients have been exposed to patients with Hepatitis A, or have been working or travelling, and eating, or directly coming from the prevalence area.                                        | 1. No more than half a year accepted treatment of blood and blood products, or have any medical damage such as insanitary injection, acupuncture, puncture, operation, or have a close contaction with HBV patients or carriers. | 1.Have received blood and blood products in half a year, or have any medical damage.                                                           | 1.Two months before the onset of the disease, patients had been exposed to hepatitis E infected patients, or went to the hepatitis E outbreak place, working, travelling, eating, or dinner together.               |
| <b>Laboratory test</b>      | 2.1 Serum ALT elevated.<br>2.2 Serum anti-HAV-IgM positive.<br>2.3 Double serum anti-HAV-IgG titer increased by four times during convalescence after acute infection.<br>2.4 immuno-electron microscopy found 27nm HAV's particles in the feces. | 2.1 Serum ALT elevated.<br>2.2 Serum HBsAg positive and anti-HBc IgM positive (greater than 1:1000) or HBV-DNA positive.                                                                                                         | 2.1 Serum ALT increased.<br>2.2 Not consistent with hepatitis A, hepatitis B, hepatitis E, CMV, EBV infection.<br>2.3 Serum anti-HCV positive. | 2.1 Serum ALT elevated.<br>2.2 Serum anti-HEV IgM positive.<br>2.3 The immune electron microscopy showed 30-32nm particles in feces.<br>2.4 It is not consistent with hepatitis A, hepatitis B, CMV, EBV infection. |
| <b>Diagnose</b>             | <b>Clinical diagnosis:</b> suspected cases+1+2.1<br><b>Laboratory confirmation</b>                                                                                                                                                                | <b>Clinical diagnosis:</b> suspected cases+1+2.1<br><b>Laboratory confirmation</b>                                                                                                                                               | <b>Clinical diagnosis:</b> suspected cases+2.1+2.2, with 1 as supporting evidence                                                              | <b>Clinical diagnosis:</b> suspected cases+2.1+2.4, with 1 as supporting evidence                                                                                                                                   |

1  
2  
3  
4  
5  
6  
7  
8  
9  
10  
11  
12  
13  
14  
15  
16  
17  
18  
19  
20  
21  
22  
23  
24  
25  
26  
27  
28  
29  
30  
31  
32  
33  
34  
35  
36  
37  
38  
39  
40  
41  
42  
43  
44  
45  
46  
47  
48  
49  
50  
51  
52  
53  
54  
55  
56  
57  
58  
59  
60

|  |                                                                                     |                                       |                                                               |                                                                                                 |
|--|-------------------------------------------------------------------------------------|---------------------------------------|---------------------------------------------------------------|-------------------------------------------------------------------------------------------------|
|  | <b>diagnosis:</b> suspected cases+2.2 or suspected cases+2.3 or suspected cases+2.4 | <b>diagnosis:</b> suspected cases+2.2 | <b>Laboratory confirmation diagnosis:</b> suspected cases+2.3 | <b>Laboratory confirmation diagnosis:</b> in accordance with the clinical diagnosis +2.2 or 2.3 |
|--|-------------------------------------------------------------------------------------|---------------------------------------|---------------------------------------------------------------|-------------------------------------------------------------------------------------------------|

For peer review only

**Appendix Table 3. Average annual percentage change(AAPC) and Annual percentage change(APC) of reported incidence of Viral hepatitis, hepatitis B, hepatitis C, hepatitis A, hepatitis E, with age distribution**

| Viral hepatitis | Year      | AAPC/APC(95%CI)  |                      | Trend | P-Value  |       |
|-----------------|-----------|------------------|----------------------|-------|----------|-------|
|                 | 2004-2016 | AAPC             | 0.3%(-0.9~1.5)       |       | Stable   | 0.6   |
| Viral hepatitis | 2004-2007 | APC <sup>1</sup> | 9.0%(3.7~14.6)       |       | Increase | <0.05 |
|                 | 2007-2016 | APC <sup>2</sup> | -2.4%(-3.3~-1.6)     |       | Decrease | <0.05 |
| HBV             | Year      | AAPC/APC(95%CI)  |                      | Trend | P-Value  |       |
|                 | 2004-2016 | AAPC             | -0.2%(-1.6~1.2)      |       | Stable   | 0.8   |
|                 | 2004-2007 | APC <sup>1</sup> | 10.3%(4.1~16.9)      |       | Increase | <0.05 |
|                 | 2007-2016 | APC <sup>2</sup> | -3.5%(-4.5~-2.5)     |       | Decrease | <0.05 |
| HCV             | Year      | AAPC/APC(95%CI)  |                      | Trend | P-Value  |       |
|                 | 2004-2016 | AAPC             | 14.5%(13.1~15.9)     |       | Increase | <0.05 |
|                 | 2004-2007 | APC <sup>1</sup> | 34.4%(27.7~41.3)     |       | Increase | <0.05 |
|                 | 2007-2012 | APC <sup>2</sup> | 15.9%(13.6~18.2)     |       | Increase | <0.05 |
|                 | 2012-2016 | APC <sup>3</sup> | 0.1%(-1.5~1.7)       |       | Stable   | 0.9   |
| HAV             | Year      | AAPC/APC(95%CI)  |                      | Trend | P-Value  |       |
|                 | 2004-2016 | AAPC             | -13.1%(-15.1, -11.0) |       | Decrease | <0.05 |
| HEV             | Year      | AAPC/APC(95%CI)  |                      | Trend | P-Value  |       |
|                 | 2004-2016 | AAPC             | 4.7%(2.8~6.7)        |       | Increase | <0.05 |
|                 | 2004-2011 | APC <sup>1</sup> | 8.1%(5.2~11.0)       |       | Increase | <0.05 |
|                 | 2011-2016 | APC <sup>2</sup> | 0.3%(-3.4~4.1)       |       | Stable   | 0.9   |

AAPC: Average annual percentage change; APC: Annual percentage change; HBV: Hepatitis B, HCV: Hepatitis C, HAV: Hepatitis A, HEV: Hepatitis E.



**Appendix Table 4. Average annual percentage change(AAPC) and Annual percentage change(APC) of reported incidence of hepatitis B, hepatitis C, hepatitis A, hepatitis E, with age distribution**

| <b>HBV</b>        | <b>Year</b> | <b>AAPC/APC(95%CI)</b> |                     | <b>Trend</b> | <b>P-Value</b> |
|-------------------|-------------|------------------------|---------------------|--------------|----------------|
| <b>Age&lt;1</b>   | 2004-2013   | APC                    | 0.4%(-2.7~3.6)      | Stable       | 0.8            |
|                   | 2004-2013   | AAPC                   | -15.5%(-18.4~-12.4) | Decrease     | <0.05          |
| <b>1~9</b>        | 2004-2006   | APC <sup>1</sup>       | -3.9%(-18.8~13.7)   | Decrease     | 0.6            |
|                   | 2006-2013   | APC <sup>2</sup>       | -18.5%(-21.3~-15.5) | Decrease     | <0.05          |
| <b>10~19</b>      | 2004-2013   | AAPC                   | -12.1%(-14.4~-9.7)  | Decrease     | <0.05          |
|                   | 2004-2007   | APC <sup>1</sup>       | 0.9%(-6.1~8.4)      | Stable       | 0.8            |
|                   | 2007-2013   | APC <sup>2</sup>       | -18.0%(-21.1~-14.7) | Decrease     | <0.05          |
| <b>20~24</b>      | 2004-2013   | AAPC                   | -4.4%(-7.7~-1.0)    | Decrease     | <0.05          |
|                   | 2004-2008   | APC <sup>1</sup>       | 4.3%(-3.4~12.6)     | Stable       | 0.2            |
|                   | 2008-2013   | APC <sup>2</sup>       | -10.8%(-15.7~-5.7)  | Decrease     | <0.05          |
| <b>25~29</b>      | 2004-2013   | AAPC                   | 0.2%(-2.0~2.5)      | Stable       | 0.9            |
|                   | 2004-2007   | APC <sup>1</sup>       | 10.9%(3.1~19.4)     | Increase     | <0.05          |
|                   | 2007-2013   | APC <sup>2</sup>       | -4.8%(-7.1~-2.4)    | Decrease     | <0.05          |
| <b>30~39</b>      | 2004-2013   | AAPC                   | -1.1%(-1.0~3.2)     | Stable       | 0.3            |
|                   | 2004-2007   | APC <sup>1</sup>       | 12.0%(4.8~19.7)     | Increase     | <0.05          |
|                   | 2007-2013   | APC <sup>2</sup>       | -3.9%(-6.1~-1.7)    | Decrease     | <0.05          |
| <b>40~49</b>      | 2004-2013   | AAPC                   | 1.2%(-1.2~3.5)      | Stable       | 0.3            |
|                   | 2004-2006   | APC <sup>1</sup>       | 6.8%(2.7~11.0)      | Stable       | <0.05          |
|                   | 2006-2013   | APC <sup>2</sup>       | -5.5%(-9.9~-0.8)    | Decrease     | <0.05          |
| <b>50~59</b>      | 2004-2013   | APC                    | 2.5%(0.8~4.3)       | Increase     | <0.05          |
| <b>60~69</b>      | 2004-2013   | AAPC                   | 7.1%(4.9~9.4)       | Increase     | <0.05          |
|                   | 2004-2008   | APC <sup>1</sup>       | 14.3%(8.7~20.3)     | Increase     | <0.05          |
|                   | 2008-2013   | APC <sup>2</sup>       | 1.6%(-1.1~4.5)      | Stable       | 0.2            |
| <b>70~79</b>      | 2004-2013   | AAPC                   | 6.4%(3.8~9.0)       | Increase     | <0.05          |
|                   | 2004-2009   | APC <sup>1</sup>       | 12.0%(7.3~16.9)     | Increase     | <0.05          |
|                   | 2009-2013   | APC <sup>2</sup>       | -0.2%(-4.8~4.7)     | Stable       | 0.9            |
| <b>Age&gt;=80</b> | 2004-2013   | AAPC                   | 6.8%(4.8~8.9)       | Increase     | <0.05          |
|                   | 2004-2009   | APC <sup>1</sup>       | 18.5%(14.4~22.8)    | Increase     | <0.05          |
|                   | 2009-2013   | APC <sup>2</sup>       | -6.1%(-9.4~-2.8)    | Decrease     | <0.05          |
| <b>HCV</b>        | <b>Year</b> | <b>AAPC/APC(95%CI)</b> |                     | <b>Trend</b> | <b>P-Value</b> |
| <b>Age&lt;1</b>   | 2004-2013   | AAPC                   | 23.2%(13.1~34.2)    | Increase     | <0.05          |
|                   | 2004-2007   | APC <sup>1</sup>       | 50.0%(9.2~106.0)    | Increase     | <0.05          |
|                   | 2007-2013   | APC <sup>2</sup>       | 11.7%(5.5~18.2)     | Increase     | <0.05          |
| <b>1~9</b>        | 2004-2013   | APC                    | 25.9%(15.9~36.8)    | Increase     | <0.05          |
| <b>10~19</b>      | 2004-2013   | AAPC                   | 10.4%(6.9~14.0)     | Increase     | <0.05          |
|                   | 2004-2011   | APC <sup>1</sup>       | 15.3%(12.4~18.3)    | Increase     | <0.05          |
|                   | 2011-2013   | APC <sup>2</sup>       | -5.1%(-19.7~12.1)   | Stable       | 0.5            |
| <b>20~29</b>      | 2004-2013   | AAPC                   | 14.2%(9.7~18.8)     | Increase     | <0.05          |
|                   | 2004-2007   | APC <sup>1</sup>       | 31.6%(14.0~51.8)    | Increase     | <0.05          |

|            |             |                        |                     |              |                |
|------------|-------------|------------------------|---------------------|--------------|----------------|
|            | 2007-2013   | APC <sup>2</sup>       | 6.3%(3.0~9.8)       | Increase     | <0.05          |
| 30~39      | 2004-2013   | AAPC                   | 17.7%(13.8~21.9)    | Increase     | <0.05          |
|            | 2004-2009   | APC <sup>1</sup>       | 29.7%(21.5~38.4)    | Increase     | <0.05          |
|            | 2009-2013   | APC <sup>2</sup>       | 4.4%(-1.8~10.9)     | Stable       | 0.1            |
| 40~49      | 2004-2013   | AAPC                   | 18.8%(15.8~21.9)    | Increase     | <0.05          |
|            | 2004-2011   | APC <sup>1</sup>       | 24.0%(20.5~27.5)    | Increase     | <0.05          |
|            | 2011-2013   | APC <sup>2</sup>       | 2.5%(-8.7~15.1)     | Stable       | 0.6            |
| 50~59      | 2004-2013   | AAPC                   | 19.5%(17.4~21.7)    | Increase     | <0.05          |
| 60~69      | 2004-2013   | AAPC                   | 18.1% (15.6~20.7)   | Increase     | <0.05          |
|            | 2004-2009   | APC <sup>1</sup>       | 23.7% (18.6~29.0)   | Increase     | <0.05          |
|            | 2009-2013   | APC <sup>2</sup>       | 11.5% (7.8~15.4)    | Increase     | <0.05          |
| 70~79      | 2004-2013   | AAPC                   | 14.0% (10.9~17.2)   | Increase     | <0.05          |
|            | 2004-2009   | APC <sup>1</sup>       | 21.0% (14.7~27.6)   | Increase     | <0.05          |
|            | 2009-2013   | APC <sup>2</sup>       | 5.8%(0.9~11.0)      | Increase     | <0.05          |
| Age>=80    | 2004-2013   | AAPC                   | 12.6%(9.5~15.8)     | Increase     | <0.05          |
|            | 2004-2010   | APC <sup>1</sup>       | 24.6%(19.6~29.9)    | Increase     | <0.05          |
|            | 2010-2013   | APC <sup>2</sup>       | -8.1%(-14.6~-1.2)   | Increase     | <0.05          |
|            |             |                        |                     |              |                |
| <b>HAV</b> | <b>Year</b> | <b>AAPC/APC(95%CI)</b> |                     | <b>Trend</b> | <b>P-Value</b> |
| Age<1      | 2004-2013   | APC                    | -11.1%(-15.9~-5.9)  | Decrease     | <0.05          |
| 1~4        | 2004-2013   | APC                    | -12.3%(-19.2~-4.9)  | Decrease     | <0.05          |
| 5~9        | 2004-2013   | AAPC                   | -20.1%(-22.4~-17.7) | Decrease     | <0.05          |
|            | 2004-2007   | APC <sup>1</sup>       | 9.7%(2.0~17.9)      | Increase     | <0.05          |
|            | 2007-2013   | APC <sup>2</sup>       | -31.7%(-34.8~-28.6) | Decrease     | <0.05          |
| 10~19      | 2004-2013   | AAPC                   | -16.6%(-19.4~-13.7) | Decrease     | <0.05          |
|            | 2004-2007   | APC <sup>1</sup>       | 2.3%(-6.1~11.5)     | Stable       | 0.5            |
|            | 2007-2013   | APC <sup>2</sup>       | -24.8%(-28.5~-20.8) | Decrease     | <0.05          |
| 20~29      | 2004-2013   | APC                    | -16.7%(-18.9~-14.5) | Decrease     | <0.05          |
|            | 2004-2007   | APC <sup>1</sup>       | -5.8%(-12.3~1.1)    | Stable       | 0.1            |
|            | 2007-2013   | APC <sup>2</sup>       | -21.7%(-24.5~-18.7) | Decrease     | <0.05          |
| 30~39      | 2004-2013   | APC                    | -15.1%(-16.8~-13.4) | Decrease     | <0.05          |
| 40~49      | 2004-2013   | APC                    | -14.3%(-15.9~-12.7) | Decrease     | <0.05          |
| 50~59      | 2004-2013   | APC                    | -16.1%(-19.2~-12.9) | Decrease     | <0.05          |
| 60~69      | 2004-2013   | APC                    | -11.6%(-13.1~-10.1) | Decrease     | <0.05          |
| 70~79      | 2004-2013   | APC                    | -10.1%(-12.0~-8.2)  | Decrease     | <0.05          |
| Age>=80    | 2004-2013   | APC                    | -6.7%(-9.3~-3.9)    | Decrease     | <0.05          |
| <b>HEV</b> | <b>Year</b> | <b>AAPC/APC(95%CI)</b> |                     | <b>Trend</b> | <b>P-Value</b> |
| Age<1      | 2004-2013   | APC                    | 5.8%(0.7~11.2)      | Increase     | <0.05          |
| 1~9        | 2004-2013   | APC                    | 3.0%(-2.0~8.2)      | Stable       | 0.2            |
| 10~19      | 2004-2013   | APC                    | 6.8%(3.3~10.5)      | Increase     | <0.05          |
| 20~29      | 2004-2013   | APC                    | 4.5%(1.5~7.7)       | Increase     | <0.05          |

|        |           |                  |                  |          |       |
|--------|-----------|------------------|------------------|----------|-------|
| 30~39  | 2004-2013 | APC              | 5.4%(2.9~7.9)    | Increase | <0.05 |
| 40~49  | 2004-2013 | APC              | 3.6%(0.8~6.5)    | Increase | <0.05 |
| 50~59  | 2004-2013 | APC              | 4.2%(1.1~7.4)    | Increase | <0.05 |
| 60~69  | 2004-2013 | APC              | 7.1%(4.7~9.6)    | Increase | <0.05 |
| 70~79  | 2004-2013 | APC              | 4.6%(2.8~6.3)    | Increase | <0.05 |
| Age≥80 | 2004-2013 | APC              | 6.2%(2.7~9.9)    | Increase | <0.05 |
|        | 2004-2011 | APC <sup>1</sup> | 10.6%(2.1~14.2)  | Increase | <0.05 |
|        | 2011-2013 | APC <sup>2</sup> | -7.6%(-21.6~8.9) | Decrease | 0.3   |

APCC: Average annual percentage change; APC: Annual percentage change; HBV: Hepatitis B, HCV: Hepatitis C, HAV: Hepatitis A, HEV: Hepatitis E.

**Appendix Table 5. Date of birth of reported HBV cases in different age groups from 2004-2013**

| Age groups | Date of birth | Trend    | <i>P</i> value | Joinpoint | Date of birth | Trend    | <i>P</i> value |
|------------|---------------|----------|----------------|-----------|---------------|----------|----------------|
| 10~19      | 1985-2003     | Decrease | <0.05          | 2007      | 1985-1997     | Stable   | 0.8            |
|            |               |          |                |           | 1988-2003     | Decrease | <0.05          |
| 20~24      | 1980-1993     | Decrease | <0.05          | 2008      | 1980-1988     | Stable   | 0.2            |
|            |               |          |                |           | 1984-1993     | Decrease | <0.05          |
| 25~29      | 1975-1988     | Stable   | 0.9            | 2007      | 1975-1982     | Increase | <0.05          |
|            |               |          |                |           | 1978-1988     | Decrease | <0.05          |
| 30~39      | 1965-1983     | Stable   | 0.3            | 2007      | 1965-1977     | Increase | <0.05          |
|            |               |          |                |           | 1968-1983     | Decrease | <0.05          |

## STROBE Statement—checklist of items that should be included in reports of observational studies

|                                            | Item No | Recommendation                                                                                                                                                                                                                                                                                                                                                                                                                                                                                                                                                                                                                                                                                   |
|--------------------------------------------|---------|--------------------------------------------------------------------------------------------------------------------------------------------------------------------------------------------------------------------------------------------------------------------------------------------------------------------------------------------------------------------------------------------------------------------------------------------------------------------------------------------------------------------------------------------------------------------------------------------------------------------------------------------------------------------------------------------------|
| <b>Title and abstract</b><br>(Page 3)      | 1       | (a) Indicate the study's design with a commonly used term in the title or the abstract<br>(b) Provide in the abstract an informative and balanced summary of what was done and what was found                                                                                                                                                                                                                                                                                                                                                                                                                                                                                                    |
| <b>Introduction</b>                        |         |                                                                                                                                                                                                                                                                                                                                                                                                                                                                                                                                                                                                                                                                                                  |
| Background/rationale<br>(Page 4)           | 2       | Explain the scientific background and rationale for the investigation being reported                                                                                                                                                                                                                                                                                                                                                                                                                                                                                                                                                                                                             |
| Objectives<br>(Page 4)                     | 3       | State specific objectives, including any prespecified hypotheses                                                                                                                                                                                                                                                                                                                                                                                                                                                                                                                                                                                                                                 |
| <b>Methods</b>                             |         |                                                                                                                                                                                                                                                                                                                                                                                                                                                                                                                                                                                                                                                                                                  |
| Study design<br>(Page 4&5)                 | 4       | Present key elements of study design early in the paper                                                                                                                                                                                                                                                                                                                                                                                                                                                                                                                                                                                                                                          |
| Setting<br>(Page 4&5)                      | 5       | Describe the setting, locations, and relevant dates, including periods of recruitment, exposure, follow-up, and data collection                                                                                                                                                                                                                                                                                                                                                                                                                                                                                                                                                                  |
| Participants<br>(Page 4&5)                 | 6       | (a) <i>Cohort study</i> —Give the eligibility criteria, and the sources and methods of selection of participants. Describe methods of follow-up<br><i>Case-control study</i> —Give the eligibility criteria, and the sources and methods of case ascertainment and control selection. Give the rationale for the choice of cases and controls<br><i>Cross-sectional study</i> —Give the eligibility criteria, and the sources and methods of selection of participants<br>(b) <i>Cohort study</i> —For matched studies, give matching criteria and number of exposed and unexposed<br><i>Case-control study</i> —For matched studies, give matching criteria and the number of controls per case |
| Variables<br>(Page 5)                      | 7       | Clearly define all outcomes, exposures, predictors, potential confounders, and effect modifiers. Give diagnostic criteria, if applicable                                                                                                                                                                                                                                                                                                                                                                                                                                                                                                                                                         |
| Data sources/<br>measurement<br>(Page 4&5) | 8*      | For each variable of interest, give sources of data and details of methods of assessment (measurement). Describe comparability of assessment methods if there is more than one group                                                                                                                                                                                                                                                                                                                                                                                                                                                                                                             |
| Bias                                       | 9       | Describe any efforts to address potential sources of bias                                                                                                                                                                                                                                                                                                                                                                                                                                                                                                                                                                                                                                        |
| Study size<br>(Page 4)                     | 10      | Explain how the study size was arrived at                                                                                                                                                                                                                                                                                                                                                                                                                                                                                                                                                                                                                                                        |
| Quantitative variables<br>(Page 5)         | 11      | Explain how quantitative variables were handled in the analyses. If applicable, describe which groupings were chosen and why                                                                                                                                                                                                                                                                                                                                                                                                                                                                                                                                                                     |
| Statistical methods<br>(Page 5)            | 12      | (a) Describe all statistical methods, including those used to control for confounding<br>(b) Describe any methods used to examine subgroups and interactions<br>(c) Explain how missing data were addressed<br>(d) <i>Cohort study</i> —If applicable, explain how loss to follow-up was addressed<br><i>Case-control study</i> —If applicable, explain how matching of cases and controls was addressed<br><i>Cross-sectional study</i> —If applicable, describe analytical methods taking account of sampling strategy<br>(e) Describe any sensitivity analyses                                                                                                                                |

**Results**

|                                  |     |                                                                                                                                                                                                                                                                                                                                                                                                               |
|----------------------------------|-----|---------------------------------------------------------------------------------------------------------------------------------------------------------------------------------------------------------------------------------------------------------------------------------------------------------------------------------------------------------------------------------------------------------------|
| Participants<br>(Page 5&6)       | 13* | (a) Report numbers of individuals at each stage of study—eg numbers potentially eligible, examined for eligibility, confirmed eligible, included in the study, completing follow-up, and analysed<br>(b) Give reasons for non-participation at each stage<br>(c) Consider use of a flow diagram                                                                                                               |
| Descriptive data<br>(Page 5&6)   | 14* | (a) Give characteristics of study participants (eg demographic, clinical, social) and information on exposures and potential confounders<br>(b) Indicate number of participants with missing data for each variable of interest<br>(c) <i>Cohort study</i> —Summarise follow-up time (eg, average and total amount)                                                                                           |
| Outcome data<br>(Page 5&6&7&8)   | 15* | <i>Cohort study</i> —Report numbers of outcome events or summary measures over time<br><i>Case-control study</i> —Report numbers in each exposure category, or summary measures of exposure<br><i>Cross-sectional study</i> —Report numbers of outcome events or summary measures                                                                                                                             |
| Main results<br>(Page 5&6&7&8)   | 16  | (a) Give unadjusted estimates and, if applicable, confounder-adjusted estimates and their precision (eg, 95% confidence interval). Make clear which confounders were adjusted for and why they were included<br>(b) Report category boundaries when continuous variables were categorized<br>(c) If relevant, consider translating estimates of relative risk into absolute risk for a meaningful time period |
| Other analyses<br>(Page 5&6&7&8) | 17  | Report other analyses done—eg analyses of subgroups and interactions, and sensitivity analyses                                                                                                                                                                                                                                                                                                                |

**Discussion**

|                                    |    |                                                                                                                                                                            |
|------------------------------------|----|----------------------------------------------------------------------------------------------------------------------------------------------------------------------------|
| Key results<br>(Page 8&9&10)       | 18 | Summarise key results with reference to study objectives                                                                                                                   |
| Limitations<br>(Page 10)           | 19 | Discuss limitations of the study, taking into account sources of potential bias or imprecision. Discuss both direction and magnitude of any potential bias                 |
| Interpretation<br>(Page 8,9,10,11) | 20 | Give a cautious overall interpretation of results considering objectives, limitations, multiplicity of analyses, results from similar studies, and other relevant evidence |
| Generalisability<br>(Page 10&11)   | 21 | Discuss the generalisability (external validity) of the study results                                                                                                      |

**Other information**

|                      |    |                                                                                                                                                               |
|----------------------|----|---------------------------------------------------------------------------------------------------------------------------------------------------------------|
| Funding<br>(Page 11) | 22 | Give the source of funding and the role of the funders for the present study and, if applicable, for the original study on which the present article is based |
|----------------------|----|---------------------------------------------------------------------------------------------------------------------------------------------------------------|

\*Give information separately for cases and controls in case-control studies and, if applicable, for exposed and unexposed groups in cohort and cross-sectional studies.

**Note:** An Explanation and Elaboration article discusses each checklist item and gives methodological background and published examples of transparent reporting. The STROBE checklist is best used in conjunction with this article (freely available on the Web sites of PLoS Medicine at <http://www.plosmedicine.org/>, Annals of Internal Medicine at

1  
2  
3  
4  
5  
6  
7  
8  
9  
10  
11  
12  
13  
14  
15  
16  
17  
18  
19  
20  
21  
22  
23  
24  
25  
26  
27  
28  
29  
30  
31  
32  
33  
34  
35  
36  
37  
38  
39  
40  
41  
42  
43  
44  
45  
46  
47  
48  
49  
50  
51  
52  
53  
54  
55  
56  
57  
58  
59  
60

<http://www.annals.org/>, and *Epidemiology* at <http://www.epidem.com/>). Information on the STROBE Initiative is available at [www.strobe-statement.org](http://www.strobe-statement.org).

For peer review only

# BMJ Open

## Changing incidence of reported viral hepatitis in China from 2004 to 2016: an observational study

|                                 |                                                                                                                                                                                                                                                                                                                                                                                                                                                                                                                                                                                                                                                                                                                                                                                                                                                          |
|---------------------------------|----------------------------------------------------------------------------------------------------------------------------------------------------------------------------------------------------------------------------------------------------------------------------------------------------------------------------------------------------------------------------------------------------------------------------------------------------------------------------------------------------------------------------------------------------------------------------------------------------------------------------------------------------------------------------------------------------------------------------------------------------------------------------------------------------------------------------------------------------------|
| Journal:                        | <i>BMJ Open</i>                                                                                                                                                                                                                                                                                                                                                                                                                                                                                                                                                                                                                                                                                                                                                                                                                                          |
| Manuscript ID                   | bmjopen-2018-028248.R1                                                                                                                                                                                                                                                                                                                                                                                                                                                                                                                                                                                                                                                                                                                                                                                                                                   |
| Article Type:                   | Research                                                                                                                                                                                                                                                                                                                                                                                                                                                                                                                                                                                                                                                                                                                                                                                                                                                 |
| Date Submitted by the Author:   | 14-Jun-2019                                                                                                                                                                                                                                                                                                                                                                                                                                                                                                                                                                                                                                                                                                                                                                                                                                              |
| Complete List of Authors:       | Zhang, Mingyuan; Jilin University First Hospital, Hepatology department<br>Wu, Ruihong; Jilin University First Hospital, Hepatology department<br>Xu, Hongqin; Jilin University First Hospital, Hepatology department<br>Uhanova, Julia; University of Manitoba College of Medicine, Department of Internal Medicine<br>Gish, Robert ; Stanford Hospital and Clinics, Department of Medicine<br>Wen, Xiaoyu; Jilin University First Hospital, Hepatology department<br>Jin, Qinglong; Jilin University First Hospital, Hepatology department<br>Gerald, Minuk; University of Manitoba College of Medicine, Department of Internal Medicine<br>Nguyen, M; Stanford Hospital and Clinics, Department of Medicine<br>Gao, Yanhang; Jilin University First Hospital, Hepatology department<br>Niu, J; Jilin University First Hospital, Hepatology department |
| <b>Primary Subject Heading</b>: | Gastroenterology and hepatology                                                                                                                                                                                                                                                                                                                                                                                                                                                                                                                                                                                                                                                                                                                                                                                                                          |
| Secondary Subject Heading:      | Epidemiology, Infectious diseases, Public health                                                                                                                                                                                                                                                                                                                                                                                                                                                                                                                                                                                                                                                                                                                                                                                                         |
| Keywords:                       | HEPATITIS, EPIDEMIOLOGY, SCREENING, PREVENTION                                                                                                                                                                                                                                                                                                                                                                                                                                                                                                                                                                                                                                                                                                                                                                                                           |
|                                 |                                                                                                                                                                                                                                                                                                                                                                                                                                                                                                                                                                                                                                                                                                                                                                                                                                                          |

SCHOLARONE™  
Manuscripts



**Title page:****Title: Changing incidence of reported viral hepatitis in China from 2004 to 2016: an observational study**

Mingyuan Zhang, MD<sup>1</sup>, Ruihong Wu, M.Sc<sup>1</sup>, Hongqin Xu, PhD<sup>1</sup>, Julia Uhanova, MD<sup>2</sup>, Robert G Gish, MD<sup>3</sup>, Xiaoyu Wen, MD<sup>1</sup>, Qinglong Jin, MD<sup>1</sup>, Gerald Y Minuk<sup>2</sup>, Mindie H. Nguyen, MD<sup>3</sup>, Yanhang Gao, MD<sup>1</sup>, Junqi Niu, MD<sup>1</sup>

Mingyuan Zhang, MD, Department of Hepatology, The First Hospital of Jilin University, Changchun, Jilin, China

Ruihong Wu, M. Sc, Department of Hepatology, The First Hospital of Jilin University, Changchun, Jilin, China

Hongqin Xu, PhD, Department of Hepatology, The First Hospital of Jilin University, Changchun, Jilin, China

Julia Uhanova, Associate Professor, Section of Hepatology, Department of Internal Medicine, Rady Faculty of Health Sciences, University of Manitoba, Winnipeg, Manitoba, Canada

Robert G Gish, MD, Professor, Division of Gastroenterology and Hepatology, Department of Medicine, Stanford University Medical Center, Stanford, Palo Alto, USA

Xiaoyu Wen, Associate Professor, Department of Hepatology, The First Hospital of Jilin University, Changchun, Jilin, China

Qinglong Jin, Professor, Department of Hepatology, The First Hospital of Jilin University, Changchun, Jilin, China

Gerald Y Minuk, Professor, Section of Hepatology, Department of Internal Medicine, Rady Faculty of Health Sciences, University of Manitoba, Winnipeg, Manitoba, Canada

Mindie H. Nguyen, Professor, Division of Gastroenterology and Hepatology, Department of Medicine, Stanford University Medical Center, Stanford, Palo Alto, USA

Yanhang Gao, Professor, Department of Hepatology, The First Hospital of Jilin University, Changchun, Jilin, China

Junqi Niu, Professor, head of Hepatology department. The First Hospital of Jilin University, Changchun, Jilin, China

**WORD: 2833** (Exclude abstract and reference)

1  
2  
3  
4 **Key words: Hepatitis; Epidemiology; Screening; Prevention**  
5

6 Corresponding author: Name: Junqi Niu  
7

8 Addresses: No.71 Xinmin Street, Changchun, 130021  
9

10 E-mail: junqiniu@aliyun.com  
11

12 Tel: 0431-8187 5101; Mobile: +86 137 5666 1205; Fax: 0431-8878 6006  
13

14 First author: Name: Mingyuan Zhang, Addresses: No.71 Xinmin Street, Changchun, 130021  
15

16 E-mail: mingyuan-zhang@hotmail.com; Tel: 0431-8187 5115; Mobile: +86 138 4410 9523  
17  
18  
19  
20  
21  
22

23 **Contributorship statement:**  
24

25 Guarantor of article: JN  
26

27  
28 Specific author contributions: MZ was the first author. MZ wrote the first draft of the manuscript  
29 and collected data at the study site. RW, HX assisted MZ in running the study and interpreting the  
30 data. JU and RGG contributed to the manuscript discussion. XW and QJ contributed to the data  
31 collection. GYM and MHN contributed to the data analysis and interpretation and performed  
32 major revisions of the manuscript. YG advised on the study design and contributed to the  
33 manuscript discussion. The corresponding author JN designed and organized the study, had full  
34 access to all the data in the study and had final responsibility for the decision on content and  
35 publication submission.  
36  
37  
38  
39  
40  
41  
42  
43  
44  
45  
46  
47  
48  
49  
50  
51  
52  
53  
54  
55  
56  
57  
58  
59  
60

1  
2  
3  
4  
5  
6  
7  
8  
9  
10  
11  
12  
13  
14  
15  
16  
17  
18  
19  
20  
21  
22  
23  
24  
25  
26  
27  
28  
29  
30  
31  
32  
33  
34  
35  
36  
37  
38  
39  
40  
41  
42  
43  
44  
45  
46  
47  
48  
49  
50  
51  
52  
53  
54  
55  
56  
57  
58  
59  
60

## **Title: Changing incidence of reported viral hepatitis in China from 2004 to 2016: an observational study**

### **Abstract:**

**Objective:** China's national hepatitis burden is high. This study aims to provide a detailed national-level description of the reported incidence of viral hepatitis in China during 2004-2016.

**Design:** Observational study

**Setting:** Data were obtained from China's National Notifiable Disease Reporting System, and changing trends were estimated by joinpoint regression analysis.

**Participants:** In this system, 16,927,233 reported viral hepatitis cases occurring during 2004-2016 were identified.

**Primary outcome measure:** Incidence rates per 100,000 person-years and changing trends were calculated.

**Results:** There were 16,927,233 new cases of viral hepatitis reported in China from 2004 to 2016. Hepatitis B (HBV) (n=13,543,137, 80.00%) and hepatitis C (HCV) (n=1,844,882, 10.90%) accounted for >90% of the cases. The overall annual percent change (APC) in reported cases of viral hepatitis and HBV were 0.3% [95% confidence interval (CI) -2.0 to 0.8, P=0.6] and -0.2% (95% CI -1.6 to 1.2, P=0.8), respectively, showing a stable trend. HBV rates were highest in the 20-29 year old age group and lowest in younger individuals, likely resulting from the universal HBV vaccination. The reported incidence of HCV and hepatitis E (HEV) showed increasing trends; the APCs were 14.5% (95% CI 13.1 to 15.9, P<0.05) and 4.7% (95% CI 2.8 to 6.7, P<0.05), respectively. The hepatitis A (HAV) reporting incidence decreased, and the APC was -13.1% (95% CI -15.1 to -11.0, P<0.05). There were marked differences in the reporting of hepatitis among provinces.

**Conclusions:** HBV continues to constitute the majority of viral hepatitis cases in China. Over the entire study period, the HBV reporting incidence was stable, the HCV and HEV incidence increased, and the HAV incidence decreased. There were significant interprovincial disparities in the burden of viral hepatitis, with higher rates in economically less-developed areas. Vaccination is important for viral hepatitis prevention and control.

## Strengths and limitations of this study

- ▶ The latest comprehensive description of trends in the national and provincial reporting incidence for viral hepatitis in China since 2004 were provided.
- ▶ This study highlighted the magnitude and importance of viral hepatitis in China and provided key data to help determine where efforts need to be focused.
- ▶ We analyzed the age distributions among different types of viral hepatitis and provided the prevalence characteristics of viral hepatitis in China.
- ▶ Since the study collected data from across almost the whole country, heterogeneity across reporting centers existed, which might be a weakness.

## Introduction

Viral hepatitis is an important challenge to public health globally. In 2013, the greatest number of deaths and disability-adjusted life years (DALYs) attributable to viral hepatitis occurred in East and South Asia, including China. [1] According to the World Health Organization (WHO), approximately 100 million people in China – that is 1 in 13 people – live with chronic hepatitis B (HBV) and hepatitis C (HCV) infections. [2] In 2016, the WHO approved the first global health sector strategy on viral hepatitis, with the goal of eliminating viral hepatitis as a major public health threat by 2030. [3] To achieve this goal, a review of the current status of viral hepatitis and the different types was essential. Age distribution is important for obtaining a clear understanding of changing trends in viral hepatitis reporting and its future burden. China is a vast and diverse country with 32 provinces, and province-level data are also required for effective disease prevention, control and management. Therefore, the present study examined the reported rates of newly diagnosed cases of viral hepatitis and documented temporal trends across age groups and provinces.

## Materials and Methods

In 2004, the Chinese government established a centralized web-reporting system for notifiable infectious diseases and public health emergencies. The fundamental database for this project was maintained by the Chinese Communicable Disease Control (CCDC). A standardized case

1  
2  
3  
4 reporting form (CRF) was established for the collection of demographic and diagnostic  
5 information for each case of a reportable diseases (Appendix Table 1).  
6  
7

8 We collected data for viral hepatitis between 2004 and 2016 from the CCDC Center's  
9 website (<http://www.chinacdc.cn/>). [4,5] and the Yearbooks of Health for the People's Republic of  
10 China. [6] In the system, cases were defined with diagnostic criteria issued by the law on the  
11 prevention and control of infectious diseases of the People's Republic of China in 2004.  
12 (Appendix Table 2). In this system, the reported cases numbers and the rates among the total  
13 population were provided, and we calculated the total population number each year accordingly.  
14 Based on patient histories, clinical manifestations, and laboratory test results, cases were  
15 categorized as hepatitis A, B, C, E and unidentified hepatitis. [7] In this study, unidentified  
16 hepatitis cases were excluded. For the provincial analyzes, Hong Kong, Macao and Taiwan were  
17 not included in this research. The data were collected from the notifiable infectious disease  
18 reporting database, which is open and available to the public, and no specific permissions were  
19 required. The conduct of this study was consistent with the Declaration of Helsinki.  
20  
21  
22  
23  
24  
25  
26  
27  
28  
29  
30  
31

32 Incidence (per 100,000) was defined as the number of annual newly diagnosed cases divided  
33 by the population size. In this surveillance system, the cases were newly diagnosed rather than  
34 new infections. To avoid misunderstanding, we used the reported incidence in this research.  
35  
36  
37  
38

### 39 **Statistical analyses**

40  
41  
42 Descriptive epidemiological methods were used to examine and analyze the reported data. The  
43 annual percent change (APC), average annual percent change (AAPC) and 95% confidence  
44 intervals (CIs) were calculated for viral hepatitis overall and for individual categories of viral  
45 hepatitis (A, B, C, and E). Additionally, we investigated trends and made comparisons among  
46 different provinces by a heatmap analysis. For age distributions, cases were divided annually into  
47 10 groups for each category of viral hepatitis. Joinpoint regression models were used to describe  
48 temporal trends in the reporting of newly diagnosed cases. In describing trends, we used the terms  
49 "increase" and "decrease" when the slope (APC) was significant (two-tailed  $P < 0.05$ ). The term  
50 "stable" refers to a nonsignificant APC ( $P \geq 0.05$ ) and indicates that the incidence was maintained  
51  
52  
53  
54  
55  
56  
57  
58  
59  
60

1  
2  
3  
4 at a perennially stable level. The R language (version 3,3.0) and Joinpoint (version 4.6.0.0, April  
5  
6 2018, IMS, Inc., <https://surveillance.cancer.gov/joinpoint/>) were used for the analyses in this study.  
7  
8 The conduct of this study was consistent with the Declaration of Helsinki.  
9

### 10 **Patient and public involvement**

11  
12  
13 No patients were involved in developing the research question or the outcome measures, and no  
14  
15 patients were involved in the design, recruitment and conduct of the study. The data were  
16  
17 collected from the on-line reporting system, and patients were anonymous. We were unable to  
18  
19 disseminate the results of the research directly to study participants.  
20  
21  
22  
23

## 24 **Results**

### 25 **National and provincial reporting incidence of viral hepatitis**

#### 26 **National reporting incidence**

27  
28  
29  
30  
31  
32  
33 Between 2004 and 2016, a total of 16,927,233 newly diagnosed cases of viral hepatitis were  
34  
35 reported in China. HBV (n=13,543,137, 80.00%) and HCV (n=1,844,882, 10.90%) jointly  
36  
37 accounted for over 90% of cases. The remaining cases consisted of the following: 595,982 (3.52%)  
38  
39 cases of HAV and 300,505 (1.78%) cases of HEV (Figure 1). The total population and the definite  
40  
41 number of reported viral hepatitis in total and different categories were provided. (Appendix  
42  
43 Table3)  
44

45  
46  
47  
48  
49  
50  
51  
52  
53  
54  
55  
56  
57  
58  
59  
60  
61  
62  
63  
64  
65  
66  
67  
68  
69  
70  
71  
72  
73  
74  
75  
76  
77  
78  
79  
80  
81  
82  
83  
84  
85  
86  
87  
88  
89  
90  
91  
92  
93  
94  
95  
96  
97  
98  
99  
100  
101  
102  
103  
104  
105  
106  
107  
108  
109  
110  
111  
112  
113  
114  
115  
116  
117  
118  
119  
120  
121  
122  
123  
124  
125  
126  
127  
128  
129  
130  
131  
132  
133  
134  
135  
136  
137  
138  
139  
140  
141  
142  
143  
144  
145  
146  
147  
148  
149  
150  
151  
152  
153  
154  
155  
156  
157  
158  
159  
160  
161  
162  
163  
164  
165  
166  
167  
168  
169  
170  
171  
172  
173  
174  
175  
176  
177  
178  
179  
180  
181  
182  
183  
184  
185  
186  
187  
188  
189  
190  
191  
192  
193  
194  
195  
196  
197  
198  
199  
200  
201  
202  
203  
204  
205  
206  
207  
208  
209  
210  
211  
212  
213  
214  
215  
216  
217  
218  
219  
220  
221  
222  
223  
224  
225  
226  
227  
228  
229  
230  
231  
232  
233  
234  
235  
236  
237  
238  
239  
240  
241  
242  
243  
244  
245  
246  
247  
248  
249  
250  
251  
252  
253  
254  
255  
256  
257  
258  
259  
260  
261  
262  
263  
264  
265  
266  
267  
268  
269  
270  
271  
272  
273  
274  
275  
276  
277  
278  
279  
280  
281  
282  
283  
284  
285  
286  
287  
288  
289  
290  
291  
292  
293  
294  
295  
296  
297  
298  
299  
300  
301  
302  
303  
304  
305  
306  
307  
308  
309  
310  
311  
312  
313  
314  
315  
316  
317  
318  
319  
320  
321  
322  
323  
324  
325  
326  
327  
328  
329  
330  
331  
332  
333  
334  
335  
336  
337  
338  
339  
340  
341  
342  
343  
344  
345  
346  
347  
348  
349  
350  
351  
352  
353  
354  
355  
356  
357  
358  
359  
360  
361  
362  
363  
364  
365  
366  
367  
368  
369  
370  
371  
372  
373  
374  
375  
376  
377  
378  
379  
380  
381  
382  
383  
384  
385  
386  
387  
388  
389  
390  
391  
392  
393  
394  
395  
396  
397  
398  
399  
400  
401  
402  
403  
404  
405  
406  
407  
408  
409  
410  
411  
412  
413  
414  
415  
416  
417  
418  
419  
420  
421  
422  
423  
424  
425  
426  
427  
428  
429  
430  
431  
432  
433  
434  
435  
436  
437  
438  
439  
440  
441  
442  
443  
444  
445  
446  
447  
448  
449  
450  
451  
452  
453  
454  
455  
456  
457  
458  
459  
460  
461  
462  
463  
464  
465  
466  
467  
468  
469  
470  
471  
472  
473  
474  
475  
476  
477  
478  
479  
480  
481  
482  
483  
484  
485  
486  
487  
488  
489  
490  
491  
492  
493  
494  
495  
496  
497  
498  
499  
500  
501  
502  
503  
504  
505  
506  
507  
508  
509  
510  
511  
512  
513  
514  
515  
516  
517  
518  
519  
520  
521  
522  
523  
524  
525  
526  
527  
528  
529  
530  
531  
532  
533  
534  
535  
536  
537  
538  
539  
540  
541  
542  
543  
544  
545  
546  
547  
548  
549  
550  
551  
552  
553  
554  
555  
556  
557  
558  
559  
560  
561  
562  
563  
564  
565  
566  
567  
568  
569  
570  
571  
572  
573  
574  
575  
576  
577  
578  
579  
580  
581  
582  
583  
584  
585  
586  
587  
588  
589  
590  
591  
592  
593  
594  
595  
596  
597  
598  
599  
600  
601  
602  
603  
604  
605  
606  
607  
608  
609  
610  
611  
612  
613  
614  
615  
616  
617  
618  
619  
620  
621  
622  
623  
624  
625  
626  
627  
628  
629  
630  
631  
632  
633  
634  
635  
636  
637  
638  
639  
640  
641  
642  
643  
644  
645  
646  
647  
648  
649  
650  
651  
652  
653  
654  
655  
656  
657  
658  
659  
660  
661  
662  
663  
664  
665  
666  
667  
668  
669  
670  
671  
672  
673  
674  
675  
676  
677  
678  
679  
680  
681  
682  
683  
684  
685  
686  
687  
688  
689  
690  
691  
692  
693  
694  
695  
696  
697  
698  
699  
700  
701  
702  
703  
704  
705  
706  
707  
708  
709  
710  
711  
712  
713  
714  
715  
716  
717  
718  
719  
720  
721  
722  
723  
724  
725  
726  
727  
728  
729  
730  
731  
732  
733  
734  
735  
736  
737  
738  
739  
740  
741  
742  
743  
744  
745  
746  
747  
748  
749  
750  
751  
752  
753  
754  
755  
756  
757  
758  
759  
760  
761  
762  
763  
764  
765  
766  
767  
768  
769  
770  
771  
772  
773  
774  
775  
776  
777  
778  
779  
780  
781  
782  
783  
784  
785  
786  
787  
788  
789  
790  
791  
792  
793  
794  
795  
796  
797  
798  
799  
800  
801  
802  
803  
804  
805  
806  
807  
808  
809  
810  
811  
812  
813  
814  
815  
816  
817  
818  
819  
820  
821  
822  
823  
824  
825  
826  
827  
828  
829  
830  
831  
832  
833  
834  
835  
836  
837  
838  
839  
840  
841  
842  
843  
844  
845  
846  
847  
848  
849  
850  
851  
852  
853  
854  
855  
856  
857  
858  
859  
860  
861  
862  
863  
864  
865  
866  
867  
868  
869  
870  
871  
872  
873  
874  
875  
876  
877  
878  
879  
880  
881  
882  
883  
884  
885  
886  
887  
888  
889  
890  
891  
892  
893  
894  
895  
896  
897  
898  
899  
900  
901  
902  
903  
904  
905  
906  
907  
908  
909  
910  
911  
912  
913  
914  
915  
916  
917  
918  
919  
920  
921  
922  
923  
924  
925  
926  
927  
928  
929  
930  
931  
932  
933  
934  
935  
936  
937  
938  
939  
940  
941  
942  
943  
944  
945  
946  
947  
948  
949  
950  
951  
952  
953  
954  
955  
956  
957  
958  
959  
960  
961  
962  
963  
964  
965  
966  
967  
968  
969  
970  
971  
972  
973  
974  
975  
976  
977  
978  
979  
980  
981  
982  
983  
984  
985  
986  
987  
988  
989  
990  
991  
992  
993  
994  
995  
996  
997  
998  
999  
1000

Viral hepatitis reporting incidence increased from 85.49/100,000 in 2004 to 108.44/100,000 in 2007 (P<0.05). After 2007, there was a significant decrease to 89.11/100,000 in 2016 (P<0.05). Overall, the APC was 0.3% (95% CI -2.0 to 0.8, P=0.6), indicating a stable trend. (Appendix Figure 1.1)

The reporting incidence for HBV increased from 2004 (67.96/100,000) to 2009 (88.82/100,000) and then decreased in 2016 (68.74/100,000). From 2004 to 2007, the APC was 10.3% (95% CI 4.1 to 16.9, P<0.05), while from 2007 to 2016, the APC was -3.5% (95% CI -4.5

1  
2  
3  
4 to -2.5,  $P<0.05$ ). Overall, the APC of HBV was -0.2% (95% CI -1.6 to 1.2,  $P=0.8$ ), indicating a  
5  
6 stable trend (Appendix Figure 1.2).

7  
8 The reporting incidence for HCV increased from 2004 (2.92/100,000) to 2016  
9 (15.09/100,000). From 2004 to 2007, the APC was 34.4% (95% CI 27.7 to 41.3,  $P<0.05$ ),  
10 indicating a significant increase. Thereafter, the APC from 2007 to 2012 was 15.9% (95% CI 13.6  
11 to 18.2,  $P<0.05$ ), indicating a significant but slow increase, and from 2012 to 2016, the APC was  
12 0.1% (95% CI -1.5 to 1.7,  $P=0.9$ ), indicating a stable trend. Overall, the APC was 14.5% (95% CI  
13 13.1 to 15.9,  $P<0.05$ ), indicating an increased trend (Appendix Figure 1.3).

14  
15 For HAV, the reporting incidence decreased from 2004 (6.94/100,000) to 2016  
16 (1.55/100,000). The APC for the entire period was -13.1% (95% CI -15.1 to -11.0,  $P<0.05$ )  
17 (Appendix Figure 1.4). For HEV, the reporting incidence increased from 1.22/100,000 in 2004 to  
18 2.18/100,000 in 2011, with an APC of 8.1% (95% CI 5.2 to 11.0,  $P<0.05$ ). From 2011 to 2016, the  
19 reporting incidence decreased to 2.04/100,000, and the APC was stable (0.3%; 95% CI -3.4 to 4.1,  
20  $P=0.9$ ). Overall, the APC for HEV was 4.7% (95% CI 2.8 to 6.7,  $P<0.05$ ), indicating an increasing  
21 trend (Appendix Figure 1.5).

22  
23 Detailed information of the joinpoint analysis results are provided in Appendix Table 4.

### 24 25 **Reporting incidence in relation to age**

26  
27 Marked differences in the reporting incidence of HBV were evident among the various age groups.  
28 Overall, the HBV reporting incidence was highest in the 20-29 year old age group. When  
29 subdivided into 20-25 and 26-29 year old age groups, the highest incidence was in the 26-29 year  
30 old group. The lowest reporting incidence of viral hepatitis occurred in the age group between 1  
31 and 9 years old. In terms of trends from 2004 to 2013, the age groups <1, 30-39, and 40-49 were  
32 stable, while the age groups 1-9, 10-19, and 20-29 decreased. The reporting incidence for all  
33 subjects over the age of 50 increased. More recently (beyond 2007), most age groups showed a  
34 significant decrease or stable trend; however, the trend increased in the "50-59" age group. (Figure  
35  
36  
37  
38  
39  
40  
41  
42  
43  
44  
45  
46  
47  
48  
49  
50  
51  
52  
53  
54  
55  
56  
57  
58  
59  
60  
2)

1  
2  
3  
4 For HCV, aside from the <1 year old age group, the reporting incidence in the different age  
5 groups increased with age. The highest reporting incidence was in those >80 years old and the  
6 lowest was in those between 1 and 19 years old. From 2004 to 2013, each age group showed an  
7 increasing trend, but more recently (beyond 2011) rates were stable in the 10-19, 30-39, and  
8 30-49 age groups. (Figure 3)  
9  
10  
11  
12

13  
14 For HAV, the highest reporting incidence was in the 1-9 age group, with incidence in the 5-9  
15 age group higher than that in the 1-4 age group. The lowest reporting incidence was in the <1 age  
16 group. In terms of trends, incidence in the 5-9 age group was stable, as was that in the 10-29 age  
17 group after 2007. All other age groups showed decreasing trends during this period. (Figure 4)  
18  
19  
20  
21  
22

23 For HEV, the highest reporting incidence was in the relatively older age group (60-79 years).  
24 Aside from the 1-9 age group, where the incidence was stable, and the  $\geq 80$  age group, where the  
25 incidence decreased after 2011, the other age groups showed increasing trends during this period.  
26 (Figure 5)  
27  
28  
29  
30

31 More detailed information is provided in Appendix Table 5.  
32  
33

### 34 **Provincial incidence**

35  
36  
37 In 2015, an analysis of the reporting incidence for viral hepatitis demonstrated that Xinjiang was  
38 the province with the highest rates (>200/100,000). Qinghai, Hainan, Guangdong, Shanxi, Fujian,  
39 Hubei, Inner Mongolia, Guangxi, and Hunan provinces had intermediate rates (>100 and  
40 <200/100,000), while Shanghai, Heilongjiang, Zhejiang, Jiangsu, Tianjin, Beijing had the lowest  
41 rates (<50/100,000). Specific analyses for HBV and HCV by province are provided in Appendix  
42 Figure 2.  
43  
44  
45  
46  
47  
48

49 To document trends in the reporting incidence for viral hepatitis from 2004 to 2015 by  
50 province, data and a heatmap of reporting incidence for viral hepatitis in general as well as for the  
51 different viruses are provided in Appendix Figure 3,4. For most provinces, reporting incidence for  
52 HAV decreased, while those for HCV increased. Most northern areas of China (Beijing, Tianjin,  
53 Hebei, Liaoning, Jilin, Heilongjiang) had a decreasing incidence of HEV, while the other  
54  
55  
56  
57  
58  
59  
60



1  
2  
3  
4 provinces (Jiangxi, Shandong, Hubei, Guangxi, Hainan, Chongqing, Sichuan, Guizhou, Yunnan)  
5  
6 revealed increasing trends.  
7  
8  
9

## 10 11 **Discussion** 12

13  
14 Viral hepatitis is a significant global public health issue, and it is responsible for an estimated 1.4  
15 million deaths per year from acute infection, hepatitis-related liver cirrhosis and cancer. Of those  
16 deaths, approximately 47% are attributable to HBV, 48% to HCV and the remainder to HAV and  
17 HEV infections. [1] In 2015, an estimated 257 million people were living with chronic HBV  
18 infections and 71 million with chronic HCV infections. [8] China's hepatitis burden is the highest  
19 in the world. According to the WHO, one-third of the world's 240 million people living with  
20 chronic HBV live in China, while approximately 7% of the world's 130-150 million people living  
21 with HCV live in China. [2]  
22  
23  
24  
25  
26  
27  
28  
29

30 In this study, HBV reporting incidence was lowest in children under 10 years of age and  
31 highest in the 20~29 age group. Similar results have been reported previously. [9] Further analysis  
32 of the 20-29 age group revealed that those 25-29 years of age (i.e., born in 1975-1988) had a  
33 significantly higher reporting incidence than the 20-24 age group, suggesting a possible vaccine  
34 effect (Appendix Table 6). Indeed, the HBV vaccine was first introduced into China in 1985 and  
35 integrated into the National Expanded Program on Immunization (EPI) in 1992. [10] Thus, the  
36 majority of individuals in the 25-29 age group were born in a period without HBV vaccine  
37 protection and were thus susceptible to transmission via the maternal-infant route. Of note, HBV  
38 reporting in individuals older than 50 years old showed an increase from 2004 to 2013. This could  
39 be explained by the following: (1) elderly individuals may be more likely to establish contact with  
40 the health care system. (2) There is a higher prevalence of chronic HBV and therefore a greater  
41 likelihood of presenting with complications, such as portal-hypertensive bleeding, encephalopathy,  
42 ascites, jaundice or hepatocellular carcinoma (HCC), leading to a diagnosis of HBV-related  
43 disease. (3) Elderly individuals engage in high-risk behaviors such as sexual contact, invasive  
44 medical procedures, and sharing shavers and towels, which are all important HBV transmission  
45  
46  
47  
48  
49  
50  
51  
52  
53  
54  
55  
56  
57  
58  
59  
60

1  
2  
3 routes in adults. (4) Older individuals do not have vaccine protection when they were young, and  
4 they are be more easily infected with HBV compared with successfully vaccinated children. To  
5 decrease the prevalence of HBV, vaccination among people aged 15~59 years old should also be  
6 conducted. [11]  
7  
8  
9  
10

11  
12 Regarding HCV, the reporting incidence increased with age; the lowest incidence occurred in  
13 children and adolescents, while the highest incidence was documented in the  $\geq 80$  age group.  
14 However, from 2004 to 2013, the reporting incidence increased in all age groups, which likely  
15 reflects increasing disease awareness, an increase in older individuals seeking medical care,  
16 increases in new infections, progression to complications of cirrhosis, and providing HCV testing  
17 to a new generation [8,12,13]. Notably, in China, the implementation of HCV screening for blood  
18 donors and blood products occurred in 1993, [14] and a decline in transfusion-related HCV, from  
19 72% to 47%, was associated with this intervention. [13] However, relatively high rates of HCV  
20 infections among patients undergoing hemodialysis and other invasive therapies and engaging in  
21 high-risk sexual behaviors remain a potential source for HCV transmission. [15] While the success  
22 achieved with recent directing antiviral agents (DAA) for chronic HCV predict further declines in  
23 HCV reporting, complete eradication of HCV might not be possible without an effective vaccine.  
24 [16]  
25  
26  
27  
28  
29  
30  
31  
32  
33  
34  
35  
36  
37

38 Provincial analyses demonstrated large differences in the reporting incidence for viral  
39 hepatitis in various provinces. Specifically, Xinjiang and Qinghai provinces had the highest  
40 incidence of viral hepatitis in general and HBV and HCV in particular, while incidence was lowest  
41 in Shanghai, Zhejiang, Jiangsu, Tianjin and Beijing. These findings suggest that viral hepatitis is  
42 more prevalent in less economically developed areas, where health care resources and awareness  
43 of public health are suboptimal.  
44  
45  
46  
47  
48  
49  
50

51 During this period, for HAV, the highest reported incidence was found in the 1~9 age group.  
52 For HEV, the highest reported incidence was in the older age groups (between 60 and 79 years  
53 old), similar to Ren's research. [17] A heatmap analysis of changing trends within the provinces  
54 documented that HAV reporting decreased. This finding likely reflects the impact of effective  
55  
56  
57  
58  
59  
60

1  
2  
3  
4 HAV vaccination (a live attenuated HAV vaccine was introduced in 1992 and incorporated into  
5 the EPI in 2008). [18] Regarding the reporting incidence for HCV and HEV in most provinces, the  
6 increased trends might be ascribed to a lack of effective vaccines, more widespread application of  
7 HCV testing, and more sensitive and specific HEV diagnostics. [19] Also potentially important is  
8 the increased insurance coverage and patient reimbursement program in China, resulting in the  
9 increased exposure of large segments of the population to the health care system. [20] Indeed,  
10 between 2003 and 2011, insurance coverage increased from 30% to 96%, and physical access to  
11 health services was achieved for 83% of the general population.  
12  
13  
14  
15  
16  
17  
18  
19

20 There are certain limitations to this study that warrant emphasis. First, protocols were not in  
21 place to evaluate data quality and consistency across reporting centers. Second, it is unknown  
22 which and when certain diagnostic tests were introduced into the various laboratories throughout  
23 the country. Third, the distinction between acute and recently identified chronic infections was  
24 difficult and, in some cases, not possible. Fourth, certain demographic characteristics were not  
25 provided in the electronic system; therefore, trends in sex reporting could not be ascertained.  
26  
27  
28  
29  
30  
31  
32

33 In conclusion, this study underscores the magnitude of viral hepatitis reporting in China.  
34 Overall, the reporting of new cases of viral hepatitis and HBV has been stable. HBV continues to  
35 be the most commonly reported hepatotropic virus, but the minimal reporting in the young  
36 underscores the value of the HBV vaccine. Similarly, HAV, which mainly occurred in children  
37 and adolescents, decreased with the introduction of the HAV vaccination. HCV and HEV cases  
38 was relatively higher among elderly individuals and increased during the study period. Thus, for  
39 these viruses, increased awareness and effective vaccines are urgently needed.  
40  
41  
42  
43  
44  
45  
46  
47  
48  
49

#### 50 **Acknowledgments:**

51  
52 We thank the physicians, doctors, and the staff of the Center for Disease Control (CDC) for their  
53 work on data collection. The authors also wish to thank Professor Fujie Xu, Division of Viral  
54 Hepatitis, National Center for HIV, Viral Hepatitis, STD, and TB Prevention (NCHHSTP),  
55  
56  
57  
58  
59  
60

Centers for Disease Control and Prevention (CDC), Atlanta, USA, and Dr. Lan Zhang, Gilead Sciences Shanghai Pharmaceutical Technology Company, China, for helpful comments and valuable suggestions. All authors have no association that might pose a conflict of interest.

**Potential conflicts of interest:**

The authors declare no conflicts of interest.

**Data sharing statement:**

No additional data are available.

**Funding:**

This work was supported by the National Science and Technology Major Project [2014ZX10002002], the Program for JLU Science and Technology Innovative Research [No.2017TD-08] and the Fundamental Research Funds for the Central Universities [No.2017TD-08].

**Figures:**

**Figure 1.** Reported cases of total viral hepatitis and its different categories

**Figure 2.** Reported incidence of hepatitis B from 2003 to 2013

**Figure 3.** Reported incidence of hepatitis C from 2003 to 2013

**Figure 4.** Reported incidence of hepatitis A from 2003 to 2013

**Figure 5.** Reported incidence of hepatitis E from 2003 to 2013

## References

1. Stanaway JD, Flaxman AD, Naghavi M, et al. The global burden of viral hepatitis from 1990 to 2013: findings from the Global Burden of Disease Study 2013. *Lancet* 2016;**388**(10049):1081-88  
doi: 10.1016/S0140-6736(16)30579-7[published Online First: Epub Date].
2. Up to 10 million people in China could die from chronic hepatitis by 2030 – Urgent action needed to bring an end to the ‘silent epidemic’ .  
<http://www.wpro.who.int/china/mediacentre/releases/2016/20160727-china-world-hepatitis-day/en/> (accessed 15 Jan 2018)
3. World Health Organization. Global health sector strategy on viral hepatitis 2006-2021.2016.  
<http://www.who.int/hepatitis/strategy2016-2021/ghss-hep/en/>(accessed: 30 Aug 2016).
4. China Center for Disease Control and Prevention.  
[http://www.nhfpc.gov.cn/jkj/s3578/new\\_list.shtml](http://www.nhfpc.gov.cn/jkj/s3578/new_list.shtml)(accessed 15 Jun 2017).
5. The Public Health Science Data Center.  
<http://www.phsciencedata.cn/Share/edtShareNew.jsp?id=39104> (accessed Sep 15, 2018).
6. National Health and Family Planning Commission of the People’s Republic of China, Health and family planning statistical yearbook of China, Beijing, 2016.
7. The national health and family planning commission of the People's Republic of China. Diagnostic criteria for infectious diseases regulated by the law on the prevention and control of infectious diseases of the People's Republic of China, 2004, Aug, 28th.
8. World Health Organization. Global hepatitis report, 2017.  
<http://www.who.int/hepatitis/publications/global-hepatitis-report2017/en/>,  
(accessed: 30 Sep 2017).
9. Yan YP, Su HX, Ji ZH, Shao ZJ, Pu ZS. Epidemiology of Hepatitis B Virus Infection in China: Current Status and Challenges. *Journal of clinical and translational hepatology* 2014;**2**(1):15-22  
doi: 10.14218/JCTH.2013.00030[published Online First: Epub Date]].
10. Chen Y, WF, Zheng H,et al. The Seroepidemiological Study and Vaccination Status Analysis on Viral Hepatitis B among Population Aged 1-59 Years in Six Areas of China in 2006.*CHINESE JOURNAL OF VACCINES AND IMMUNIZATION* 2012; 18(01): 14-8

- ( <https://dwz.cn/Z3fcEUzM>).
11. Zhang G, Miao N, Zheng H, Sun X, Yin Z, Wang F. Incidence by age and region of hepatitis B reported in China from 2005 to 2016. *CHINESE JOURNAL OF VACCINES AND IMMUNIZATION* 2018;**24**(02):121-26 (<https://dwz.cn/xK6IJZ6U>).
  12. Duan Z, Jia JD, Hou J, et al. Current challenges and the management of chronic hepatitis C in mainland China. *Journal of clinical gastroenterology* 2014;**48**(8):679-86 doi: 10.1097/MCG.000000000000109[published Online First: Epub Date].
  13. Rao H, Wei L, Lopez-Talavera JC, et al. Distribution and clinical correlates of viral and host genotypes in Chinese patients with chronic hepatitis C virus infection. *Journal of gastroenterology and hepatology* 2014;**29**(3):545-53 doi: 10.1111/jgh.12398[published Online First: Epub Date].
  14. Cui Y, Jia J. Update on epidemiology of hepatitis B and C in China. *Journal of gastroenterology and hepatology* 2013;**28 Suppl 1**:7-10 doi: 10.1111/jgh.12220[published Online First: Epub Date]].
  15. Qin Q, Smith MK, Wang L, et al. Hepatitis C virus infection in China: an emerging public health issue. *Journal of viral hepatitis* 2015;**22**(3):238-44 doi: 10.1111/jvh.12295[published Online First: Epub Date].
  16. Bartenschlager R, Baumert TF, Bukh J, et al. Critical challenges and emerging opportunities in hepatitis C virus research in an era of potent antiviral therapy: Considerations for scientists and funding agencies. *Virus research* 2018;**248**:53-62 ;doi: 10.1016/j.virusres.2018.02.016[published Online First: Epub Date].
  17. Ren X, Wu P, Wang L, et al. Changing Epidemiology of Hepatitis A and Hepatitis E Viruses in China, 1990-2014. *Emerging infectious diseases* 2017;**23**(2):276-79. doi: 10.3201/2302.161095[published Online First: Epub Date]].
  18. Fangcheng Z, Xuanyi W, Mingding C, et al. Era of vaccination heralds a decline in incidence of hepatitis A in high-risk groups in China. *Hepatitis monthly* 2012;**12**(2):100-5 doi: 10.5812/hepatmon.838[published Online First: Epub Date]].
  19. Zhang Q, Tang G, Liu H, et al. Investigation on the causes of increased hepatitis E cases reported

1  
2  
3  
4 in Guizhou province. Chinese Journal Epidemiology 2015;36(3):228-31.

5  
6 doi:[10.3760/cma.j.issn.0254-6450.2015.03.008](https://doi.org/10.3760/cma.j.issn.0254-6450.2015.03.008)

- 7  
8 20. Meng Q, Xu L, Zhang Y, et al. Trends in access to health services and financial protection in  
9  
10 China between 2003 and 2011: a cross-sectional study. Lancet 2012;**379**(9818):805-14 doi:  
11  
12 10.1016/S0140-6736(12)60278-5[published Online First: Epub Date]].  
13  
14  
15  
16  
17  
18  
19  
20  
21  
22  
23  
24  
25  
26  
27  
28  
29  
30  
31  
32  
33  
34  
35  
36  
37  
38  
39  
40  
41  
42  
43  
44  
45  
46  
47  
48  
49  
50  
51  
52  
53  
54  
55  
56  
57  
58  
59  
60

For peer review only

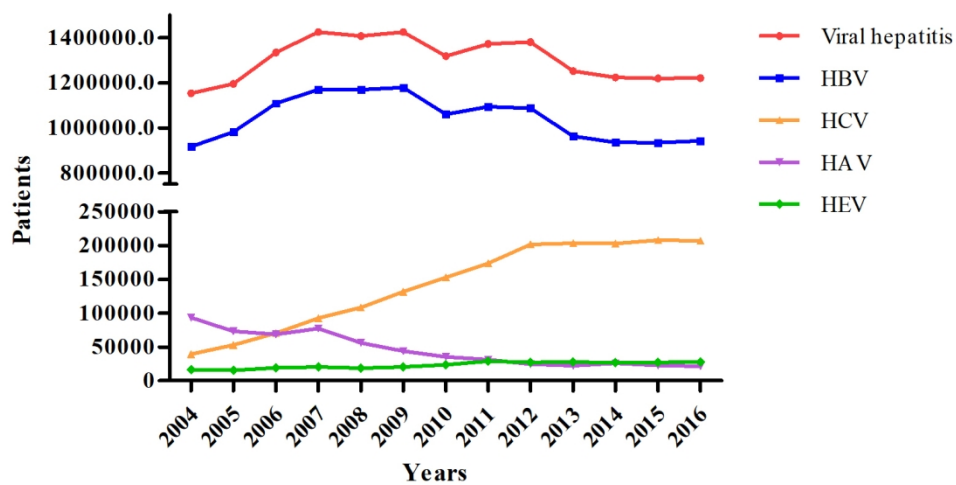

Report cases of viral hepatitis in total and its different categories

138x75mm (300 x 300 DPI)



1  
2  
3  
4  
5  
6  
7  
8  
9  
10  
11  
12  
13  
14  
15  
16  
17  
18  
19  
20  
21  
22  
23  
24  
25  
26  
27  
28  
29  
30  
31  
32  
33  
34  
35  
36  
37  
38  
39  
40  
41  
42  
43  
44  
45  
46  
47  
48  
49  
50  
51  
52  
53  
54  
55  
56  
57  
58  
59  
60

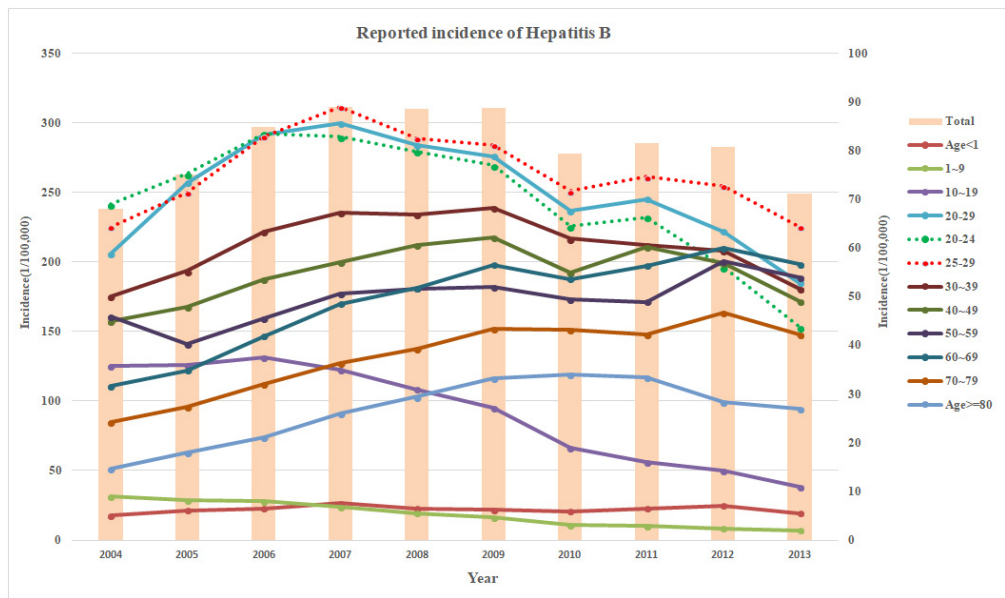

Reported incidence of hepatitis B from 2003 to 2013

88x52mm (300 x 300 DPI)

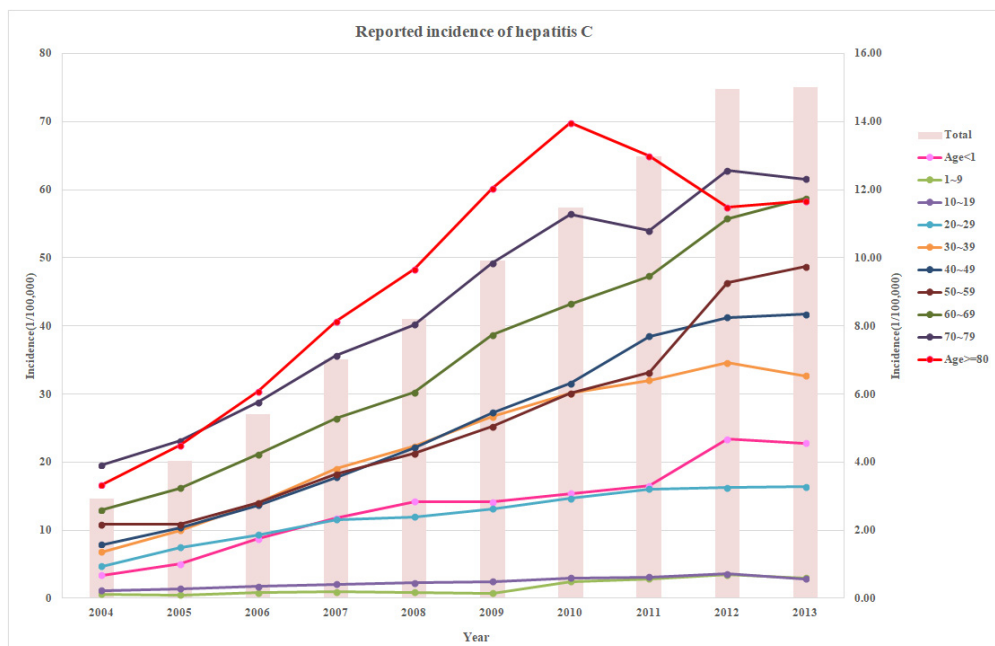

Reported incidence of hepatitis C from 2003 to 2013

94x60mm (300 x 300 DPI)

1  
2  
3  
4  
5  
6  
7  
8  
9  
10  
11  
12  
13  
14  
15  
16  
17  
18  
19  
20  
21  
22  
23  
24  
25  
26  
27  
28  
29  
30  
31  
32  
33  
34  
35  
36  
37  
38  
39  
40  
41  
42  
43  
44  
45  
46  
47  
48  
49  
50  
51  
52  
53  
54  
55  
56  
57  
58  
59  
60

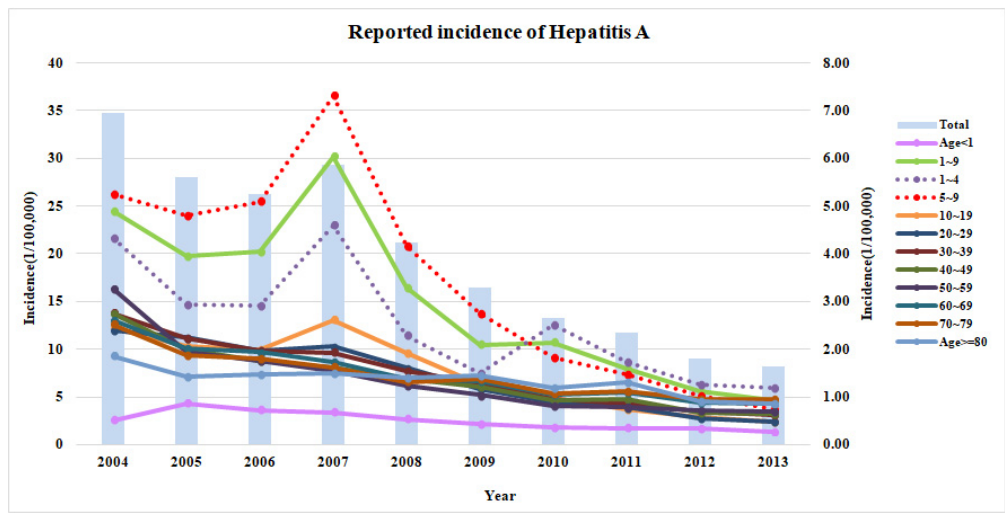

Reported incidence of hepatitis A from 2003 to 2013

75x38mm (300 x 300 DPI)

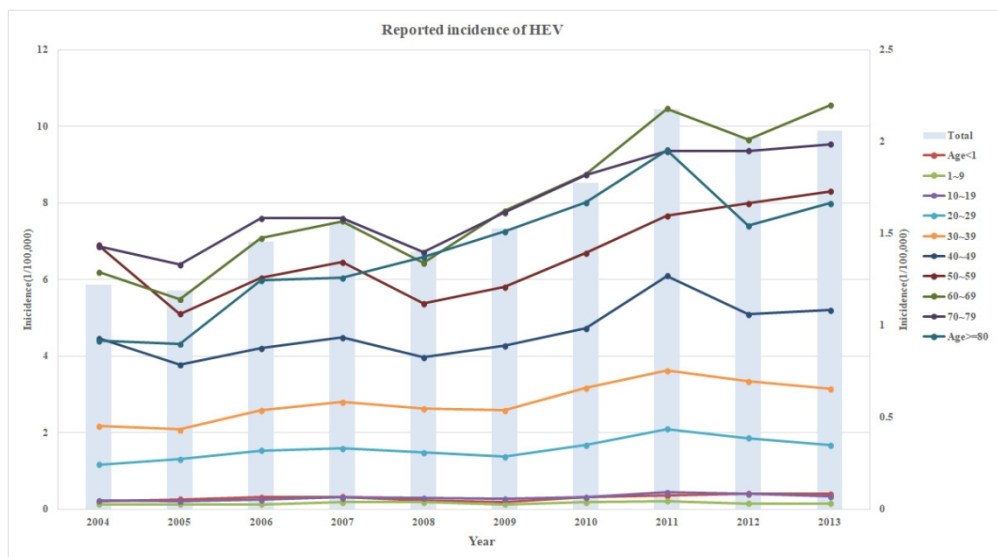

Reported incidence of hepatitis E from 2003 to 2013

102x56mm (300 x 300 DPI)

**Appendix Table1.****Web-based Clinical reporting form(CRF)**

|                             |                          |                                       |      |                      |                 |                 |
|-----------------------------|--------------------------|---------------------------------------|------|----------------------|-----------------|-----------------|
| Name:                       | Family member's Name:    | Date of birth:                        | Age: | Gender:              | Marital status: | Family address: |
| ID number:                  |                          | Telephone number:                     |      | Occupation:          |                 |                 |
| Degree of education:        |                          | Nationality:                          |      | Report disease name: |                 |                 |
| Classification of disease:  |                          | i: Clinical diagnosis                 |      |                      |                 |                 |
|                             |                          | ii: Laboratory confirmation diagnosis |      |                      |                 |                 |
|                             |                          | iii: Suspected cases                  |      |                      |                 |                 |
|                             |                          | iv: Pathogen carriers                 |      |                      |                 |                 |
| Dates of onset:             | Date of being diagnosed: | Methods of diagnose:                  |      | Date of death:       |                 |                 |
| Date of completing the CRF: |                          | Name of reporting doctor:             |      |                      | Department:     |                 |

## Appendix Table2.

## Diagnostic criteria for viral hepatitis by the law on the prevention and control of infectious diseases of the People's Republic of China, 2004

| Viral hepatitis             |                                                                                                                                                                                                                                                   |                                                                                                                                                                                                                                  |                                                                                                                                                |                                                                                                                                                                                                                     |
|-----------------------------|---------------------------------------------------------------------------------------------------------------------------------------------------------------------------------------------------------------------------------------------------|----------------------------------------------------------------------------------------------------------------------------------------------------------------------------------------------------------------------------------|------------------------------------------------------------------------------------------------------------------------------------------------|---------------------------------------------------------------------------------------------------------------------------------------------------------------------------------------------------------------------|
| <b>Clinical description</b> | (I).Recently, there has been a loss of appetite, nausea, refused fatty food, fatigue, jaundice, tea color urine, liver enlargement, liver pain, fatigue, etc, exclude other diseases;                                                             |                                                                                                                                                                                                                                  |                                                                                                                                                |                                                                                                                                                                                                                     |
| <b>Laboratory test</b>      | (II).Serum ALT elevated repeatedly and cannot be explained by other causes.                                                                                                                                                                       |                                                                                                                                                                                                                                  |                                                                                                                                                |                                                                                                                                                                                                                     |
| <b>Diagnose</b>             | Suspected cases:(I)+(II)                                                                                                                                                                                                                          |                                                                                                                                                                                                                                  |                                                                                                                                                |                                                                                                                                                                                                                     |
| <b>Classification</b>       | <b>Hepatitis A</b>                                                                                                                                                                                                                                | <b>Hepatitis B</b>                                                                                                                                                                                                               | <b>Hepatitis C</b>                                                                                                                             | <b>Hepatitis E</b>                                                                                                                                                                                                  |
| <b>Clinical description</b> | 1.One month (2-6 weeks) before the onset of illness, patients have been exposed to patients with Hepatitis A, or have been working or travelling, and eating, or directly coming from the prevalence area.                                        | 1. No more than half a year accepted treatment of blood and blood products, or have any medical damage such as insanitary injection, acupuncture, puncture, operation, or have a close contaction with HBV patients or carriers. | 1.Have received blood and blood products in half a year, or have any medical damage.                                                           | 1.Two months before the onset of the disease, patients had been exposed to hepatitis E infected patients, or went to the hepatitis E outbreak place, working, travelling, eating, or dinner together.               |
| <b>Laboratory test</b>      | 2.1 Serum ALT elevated.<br>2.2 Serum anti-HAV-IgM positive.<br>2.3 Double serum anti-HAV-IgG titer increased by four times during convalescence after acute infection.<br>2.4 immuno-electron microscopy found 27nm HAV's particles in the feces. | 2.1 Serum ALT elevated.<br>2.2 Serum HBsAg positive and anti-HBc IgM positive (greater than 1:1000) or HBV-DNA positive.                                                                                                         | 2.1 Serum ALT increased.<br>2.2 Not consistent with hepatitis A, hepatitis B, hepatitis E, CMV, EBV infection.<br>2.3 Serum anti-HCV positive. | 2.1 Serum ALT elevated.<br>2.2 Serum anti-HEV IgM positive.<br>2.3 The immune electron microscopy showed 30-32nm particles in feces.<br>2.4 It is not consistent with hepatitis A, hepatitis B, CMV, EBV infection. |
| <b>Diagnose</b>             | <b>Clinical diagnosis:</b> suspected cases+1+2.1<br><b>Laboratory confirmation</b>                                                                                                                                                                | <b>Clinical diagnosis:</b> suspected cases+1+2.1<br><b>Laboratory confirmation</b>                                                                                                                                               | <b>Clinical diagnosis:</b> suspected cases+2.1+2.2, with 1 as supporting evidence                                                              | <b>Clinical diagnosis:</b> suspected cases+2.1+2.4, with 1 as supporting evidence                                                                                                                                   |

1  
2  
3  
4  
5  
6  
7  
8  
9  
10  
11  
12  
13  
14  
15  
16  
17  
18  
19  
20  
21  
22  
23  
24  
25  
26  
27  
28  
29  
30  
31  
32  
33  
34  
35  
36  
37  
38  
39  
40  
41  
42  
43  
44  
45  
46  
47  
48  
49  
50  
51  
52  
53  
54  
55  
56  
57  
58  
59  
60

|  |                                                                                     |                                       |                                                                         |                                                                                                           |
|--|-------------------------------------------------------------------------------------|---------------------------------------|-------------------------------------------------------------------------|-----------------------------------------------------------------------------------------------------------|
|  | <b>diagnosis:</b> suspected cases+2.2 or suspected cases+2.3 or suspected cases+2.4 | <b>diagnosis:</b> suspected cases+2.2 | <b>Laboratory confirmation</b><br><b>diagnosis:</b> suspected cases+2.3 | <b>Laboratory confirmation</b><br><b>diagnosis:</b> in accordance with the clinical diagnosis +2.2 or 2.3 |
|--|-------------------------------------------------------------------------------------|---------------------------------------|-------------------------------------------------------------------------|-----------------------------------------------------------------------------------------------------------|

For peer review only

**Appendix Table 3. Total Population, reported cases of viral hepatitis in total and different categories in China, from 2004-2016**

| Year | Total Population | Viral hepatitis (Rate) | HBV (Rate)       | HCV (Rate)     | HAV (Rate)   | HEV (Rate)   |
|------|------------------|------------------------|------------------|----------------|--------------|--------------|
| 2004 | 1,348,440,164    | 1,152,874(85.50)       | 916,426(67.96)   | 39,381(2.92)   | 93,587(6.94) | 16,444(1.22) |
| 2005 | 1,307,513,434    | 1,195,355(91.42)       | 982,297(75.13)   | 52,927(4.05)   | 73,349(5.61) | 15,541(1.19) |
| 2006 | 1,307,566,387    | 1,334,859(102.09)      | 1,109,130(84.82) | 70,681(5.41)   | 68,667(5.25) | 19,007(1.45) |
| 2007 | 1,314,481,770    | 1,425,428(108.44)      | 1,169,946(89.00) | 92,378(7.03)   | 77,135(5.87) | 20,577(1.57) |
| 2008 | 1,321,305,046    | 1,407,664(106.54)      | 1,169,569(88.52) | 108,446(8.21)  | 56,052(4.24) | 18,525(1.40) |
| 2009 | 1,328,023,190    | 1,425,020(107.30)      | 1,179,607(88.82) | 131,849(9.93)  | 43,841(3.30) | 20,275(1.53) |
| 2010 | 1,334,701,299    | 1,317,982(98.75)       | 1,060,582(79.46) | 153,039(11.47) | 35,277(2.64) | 23,682(1.77) |
| 2011 | 1,340,936,879    | 1,372,344(102.34)      | 1,093,335(81.54) | 173,872(12.97) | 31,456(2.35) | 29,202(2.18) |
| 2012 | 1,347,349,640    | 1,380,800(102.48)      | 1,087,086(80.68) | 201,622(14.96) | 24,453(1.81) | 27,271(2.02) |
| 2013 | 1,354,058,016    | 1,251,872(92.45)       | 962,974(71.12)   | 203,155(15.00) | 22,244(1.64) | 27,902(2.06) |
| 2014 | 1,355,173,143    | 1,223,021(90.25)       | 935,702(69.05)   | 202,803(14.97) | 25,969(1.92) | 26,988(1.99) |
| 2015 | 1,362,466,732    | 1,218,946(89.47)       | 934,215(68.57)   | 207,897(15.26) | 22,667(1.66) | 27,169(1.99) |
| 2016 | 1,370,784,890    | 1,221,479(89.11)       | 942,268(68.74)   | 206,832(15.09) | 21,285(1.55) | 27,922(2.04) |

Rate: indicates the proportion of reported cases among total population, the unit is 1/100,000

Data from the Chinese Communicable Disease Control Center's website (<http://www.chinacdc.cn/>) and the Yearbooks of Health in the people's republic of China



**Appendix Table 4. Average annual percentage change(AAPC) and Annual percentage change(APC) of reported incidence of Viral hepatitis, hepatitis B, hepatitis C, hepatitis A, hepatitis E, with age distribution**

| Viral hepatitis | Year             | AAPC/APC(95%CI)  |                      | Trend    | P-Value  |       |
|-----------------|------------------|------------------|----------------------|----------|----------|-------|
|                 | 2004-2016        | AAPC             | 0.3%(-0.9~1.5)       |          | Stable   | 0.6   |
| Viral hepatitis | 2004-2007        | APC <sup>1</sup> | 9.0%(3.7~14.6)       |          | Increase | <0.05 |
|                 | 2007-2016        | APC <sup>2</sup> | -2.4%(-3.3~-1.6)     |          | Decrease | <0.05 |
| HBV             | Year             | AAPC/APC(95%CI)  |                      | Trend    | P-Value  |       |
|                 | 2004-2016        | AAPC             | -0.2%(-1.6~1.2)      |          | Stable   | 0.8   |
|                 | 2004-2007        | APC <sup>1</sup> | 10.3%(4.1~16.9)      |          | Increase | <0.05 |
| 2007-2016       | APC <sup>2</sup> | -3.5%(-4.5~-2.5) |                      | Decrease | <0.05    |       |
| HCV             | Year             | AAPC/APC(95%CI)  |                      | Trend    | P-Value  |       |
|                 | 2004-2016        | AAPC             | 14.5%(13.1~15.9)     |          | Increase | <0.05 |
|                 | 2004-2007        | APC <sup>1</sup> | 34.4%(27.7~41.3)     |          | Increase | <0.05 |
|                 | 2007-2012        | APC <sup>2</sup> | 15.9%(13.6~18.2)     |          | Increase | <0.05 |
| 2012-2016       | APC <sup>3</sup> | 0.1%(-1.5~1.7)   |                      | Stable   | 0.9      |       |
| HAV             | Year             | AAPC/APC(95%CI)  |                      | Trend    | P-Value  |       |
|                 | 2004-2016        | AAPC             | -13.1%(-15.1, -11.0) |          | Decrease | <0.05 |
| HEV             | Year             | AAPC/APC(95%CI)  |                      | Trend    | P-Value  |       |
|                 | 2004-2016        | AAPC             | 4.7%(2.8~6.7)        |          | Increase | <0.05 |
|                 | 2004-2011        | APC <sup>1</sup> | 8.1%(5.2~11.0)       |          | Increase | <0.05 |
|                 | 2011-2016        | APC <sup>2</sup> | 0.3%(-3.4~4.1)       |          | Stable   | 0.9   |

AAPC: Average annual percentage change; APC: Annual percentage change; HBV: Hepatitis B, HCV: Hepatitis C, HAV: Hepatitis A, HEV: Hepatitis E.

**Appendix Table 5. Average annual percentage change(AAPC) and Annual percentage change(APC) of reported incidence of hepatitis B, hepatitis C, hepatitis A, hepatitis E, with age distribution**

| HBV     | Year      | AAPC/APC(95%CI)  |                     | Trend    | P-Value |
|---------|-----------|------------------|---------------------|----------|---------|
| Age<1   | 2004-2013 | APC              | 0.4%(-2.7~3.6)      | Stable   | 0.8     |
|         | 2004-2013 | AAPC             | -15.5%(-18.4~-12.4) | Decrease | <0.05   |
|         | 2004-2006 | APC <sup>1</sup> | -3.9%(-18.8~13.7)   | Decrease | 0.6     |
| 1~9     | 2006-2013 | APC <sup>2</sup> | -18.5%(-21.3~-15.5) | Decrease | <0.05   |
|         | 2004-2013 | AAPC             | -12.1%(-14.4~-9.7)  | Decrease | <0.05   |
|         | 2004-2007 | APC <sup>1</sup> | 0.9%(-6.1~8.4)      | Stable   | 0.8     |
| 10~19   | 2007-2013 | APC <sup>2</sup> | -18.0%(-21.1~-14.7) | Decrease | <0.05   |
|         | 2004-2013 | AAPC             | -4.4%(-7.7~-1.0)    | Decrease | <0.05   |
|         | 2004-2008 | APC <sup>1</sup> | 4.3%(-3.4~12.6)     | Stable   | 0.2     |
| 20~24   | 2008-2013 | APC <sup>2</sup> | -10.8%(-15.7~-5.7)  | Decrease | <0.05   |
|         | 2004-2013 | AAPC             | 0.2%(-2.0~2.5)      | Stable   | 0.9     |
|         | 2004-2007 | APC <sup>1</sup> | 10.9%(3.1~19.4)     | Increase | <0.05   |
| 25~29   | 2007-2013 | APC <sup>2</sup> | -4.8%(-7.1~-2.4)    | Decrease | <0.05   |
|         | 2004-2013 | AAPC             | -1.1%(-1.0~3.2)     | Stable   | 0.3     |
|         | 2004-2007 | APC <sup>1</sup> | 12.0%(4.8~19.7)     | Increase | <0.05   |
| 30~39   | 2007-2013 | APC <sup>2</sup> | -3.9%(-6.1~-1.7)    | Decrease | <0.05   |
|         | 2004-2013 | AAPC             | 1.2%(-1.2~3.5)      | Stable   | 0.3     |
|         | 2004-2006 | APC <sup>1</sup> | 6.8%(2.7~11.0)      | Stable   | <0.05   |
| 40~49   | 2006-2013 | APC <sup>2</sup> | -5.5%(-9.9~-0.8)    | Decrease | <0.05   |
|         | 2004-2013 | APC              | 2.5%(0.8~4.3)       | Increase | <0.05   |
|         | 2004-2013 | AAPC             | 7.1%(4.9~9.4)       | Increase | <0.05   |
| 50~59   | 2004-2008 | APC <sup>1</sup> | 14.3%(8.7~20.3)     | Increase | <0.05   |
|         | 2008-2013 | APC <sup>2</sup> | 1.6%(-1.1~4.5)      | Stable   | 0.2     |
|         | 2004-2013 | AAPC             | 6.4%(3.8~9.0)       | Increase | <0.05   |
| 60~69   | 2004-2009 | APC <sup>1</sup> | 12.0%(7.3~16.9)     | Increase | <0.05   |
|         | 2009-2013 | APC <sup>2</sup> | -0.2%(-4.8~4.7)     | Stable   | 0.9     |
|         | 2004-2013 | AAPC             | 6.8%(4.8~8.9)       | Increase | <0.05   |
| 70~79   | 2004-2009 | APC <sup>1</sup> | 18.5%(14.4~22.8)    | Increase | <0.05   |
|         | 2009-2013 | APC <sup>2</sup> | -6.1%(-9.4~-2.8)    | Decrease | <0.05   |
|         | 2004-2013 | AAPC             | 6.8%(4.8~8.9)       | Increase | <0.05   |
| Age>=80 | 2004-2009 | APC <sup>1</sup> | 18.5%(14.4~22.8)    | Increase | <0.05   |
|         | 2009-2013 | APC <sup>2</sup> | -6.1%(-9.4~-2.8)    | Decrease | <0.05   |
|         | 2004-2013 | AAPC             | 6.8%(4.8~8.9)       | Increase | <0.05   |
| HCV     | Year      | AAPC/APC(95%CI)  |                     | Trend    | P-Value |
| Age<1   | 2004-2013 | AAPC             | 23.2%(13.1~34.2)    | Increase | <0.05   |
|         | 2004-2007 | APC <sup>1</sup> | 50.0%(9.2~106.0)    | Increase | <0.05   |
|         | 2007-2013 | APC <sup>2</sup> | 11.7%(5.5~18.2)     | Increase | <0.05   |
| 1~9     | 2004-2013 | APC              | 25.9%(15.9~36.8)    | Increase | <0.05   |
| 10~19   | 2004-2013 | AAPC             | 10.4%(6.9~14.0)     | Increase | <0.05   |
|         | 2004-2011 | APC <sup>1</sup> | 15.3%(12.4~18.3)    | Increase | <0.05   |
|         | 2011-2013 | APC <sup>2</sup> | -5.1%(-19.7~12.1)   | Stable   | 0.5     |
| 20~29   | 2004-2013 | AAPC             | 14.2%(9.7~18.8)     | Increase | <0.05   |
|         | 2004-2007 | APC <sup>1</sup> | 31.6%(14.0~51.8)    | Increase | <0.05   |

|            |             |                        |                     |              |                |
|------------|-------------|------------------------|---------------------|--------------|----------------|
|            | 2007-2013   | APC <sup>2</sup>       | 6.3%(3.0~9.8)       | Increase     | <0.05          |
| 30~39      | 2004-2013   | AAPC                   | 17.7%(13.8~21.9)    | Increase     | <0.05          |
|            | 2004-2009   | APC <sup>1</sup>       | 29.7%(21.5~38.4)    | Increase     | <0.05          |
|            | 2009-2013   | APC <sup>2</sup>       | 4.4%(-1.8~10.9)     | Stable       | 0.1            |
| 40~49      | 2004-2013   | AAPC                   | 18.8%(15.8~21.9)    | Increase     | <0.05          |
|            | 2004-2011   | APC <sup>1</sup>       | 24.0%(20.5~27.5)    | Increase     | <0.05          |
|            | 2011-2013   | APC <sup>2</sup>       | 2.5%(-8.7~15.1)     | Stable       | 0.6            |
| 50~59      | 2004-2013   | AAPC                   | 19.5%(17.4~21.7)    | Increase     | <0.05          |
| 60~69      | 2004-2013   | AAPC                   | 18.1% (15.6~20.7)   | Increase     | <0.05          |
|            | 2004-2009   | APC <sup>1</sup>       | 23.7% (18.6~29.0)   | Increase     | <0.05          |
|            | 2009-2013   | APC <sup>2</sup>       | 11.5% (7.8~15.4)    | Increase     | <0.05          |
| 70~79      | 2004-2013   | AAPC                   | 14.0% (10.9~17.2)   | Increase     | <0.05          |
|            | 2004-2009   | APC <sup>1</sup>       | 21.0% (14.7~27.6)   | Increase     | <0.05          |
|            | 2009-2013   | APC <sup>2</sup>       | 5.8%(0.9~11.0)      | Increase     | <0.05          |
| Age>=80    | 2004-2013   | AAPC                   | 12.6%(9.5~15.8)     | Increase     | <0.05          |
|            | 2004-2010   | APC <sup>1</sup>       | 24.6%(19.6~29.9)    | Increase     | <0.05          |
|            | 2010-2013   | APC <sup>2</sup>       | -8.1%(-14.6~-1.2)   | Increase     | <0.05          |
|            |             |                        |                     |              |                |
| <b>HAV</b> | <b>Year</b> | <b>AAPC/APC(95%CI)</b> |                     | <b>Trend</b> | <b>P-Value</b> |
| Age<1      | 2004-2013   | APC                    | -11.1%(-15.9~-5.9)  | Decrease     | <0.05          |
| 1~4        | 2004-2013   | APC                    | -12.3%(-19.2~-4.9)  | Decrease     | <0.05          |
| 5~9        | 2004-2013   | AAPC                   | -20.1%(-22.4~-17.7) | Decrease     | <0.05          |
|            | 2004-2007   | APC <sup>1</sup>       | 9.7%(2.0~17.9)      | Increase     | <0.05          |
|            | 2007-2013   | APC <sup>2</sup>       | -31.7%(-34.8~-28.6) | Decrease     | <0.05          |
| 10~19      | 2004-2013   | AAPC                   | -16.6%(-19.4~-13.7) | Decrease     | <0.05          |
|            | 2004-2007   | APC <sup>1</sup>       | 2.3%(-6.1~11.5)     | Stable       | 0.5            |
|            | 2007-2013   | APC <sup>2</sup>       | -24.8%(-28.5~-20.8) | Decrease     | <0.05          |
| 20~29      | 2004-2013   | APC                    | -16.7%(-18.9~-14.5) | Decrease     | <0.05          |
|            | 2004-2007   | APC <sup>1</sup>       | -5.8%(-12.3~1.1)    | Stable       | 0.1            |
|            | 2007-2013   | APC <sup>2</sup>       | -21.7%(-24.5~-18.7) | Decrease     | <0.05          |
| 30~39      | 2004-2013   | APC                    | -15.1%(-16.8~-13.4) | Decrease     | <0.05          |
| 40~49      | 2004-2013   | APC                    | -14.3%(-15.9~-12.7) | Decrease     | <0.05          |
| 50~59      | 2004-2013   | APC                    | -16.1%(-19.2~-12.9) | Decrease     | <0.05          |
| 60~69      | 2004-2013   | APC                    | -11.6%(-13.1~-10.1) | Decrease     | <0.05          |
| 70~79      | 2004-2013   | APC                    | -10.1%(-12.0~-8.2)  | Decrease     | <0.05          |
| Age>=80    | 2004-2013   | APC                    | -6.7%(-9.3~-3.9)    | Decrease     | <0.05          |
| <b>HEV</b> | <b>Year</b> | <b>AAPC/APC(95%CI)</b> |                     | <b>Trend</b> | <b>P-Value</b> |
| Age<1      | 2004-2013   | APC                    | 5.8%(0.7~11.2)      | Increase     | <0.05          |
| 1~9        | 2004-2013   | APC                    | 3.0%(-2.0~8.2)      | Stable       | 0.2            |
| 10~19      | 2004-2013   | APC                    | 6.8%(3.3~10.5)      | Increase     | <0.05          |
| 20~29      | 2004-2013   | APC                    | 4.5%(1.5~7.7)       | Increase     | <0.05          |

|                   |           |                  |                  |          |       |
|-------------------|-----------|------------------|------------------|----------|-------|
| <b>30~39</b>      | 2004-2013 | APC              | 5.4%(2.9~7.9)    | Increase | <0.05 |
| <b>40~49</b>      | 2004-2013 | APC              | 3.6%(0.8~6.5)    | Increase | <0.05 |
| <b>50~59</b>      | 2004-2013 | APC              | 4.2%(1.1~7.4)    | Increase | <0.05 |
| <b>60~69</b>      | 2004-2013 | APC              | 7.1%(4.7~9.6)    | Increase | <0.05 |
| <b>70~79</b>      | 2004-2013 | APC              | 4.6%(2.8~6.3)    | Increase | <0.05 |
| <b>Age&gt;=80</b> | 2004-2013 | APC              | 6.2%(2.7~9.9)    | Increase | <0.05 |
|                   | 2004-2011 | APC <sup>1</sup> | 10.6%(2.1~14.2)  | Increase | <0.05 |
|                   | 2011-2013 | APC <sup>2</sup> | -7.6%(-21.6~8.9) | Decrease | 0.3   |

APCC: Average annual percentage change; APC: Annual percentage change; HBV: Hepatitis B, HCV: Hepatitis C, HAV: Hepatitis A, HEV: Hepatitis E.

**Appendix Table 6. Date of birth of reported HBV cases in different age groups from 2004-2013**

| Age groups | Date of birth | Trend    | <i>P</i> value | Joinpoint | Date of birth | Trend    | <i>P</i> value |
|------------|---------------|----------|----------------|-----------|---------------|----------|----------------|
| 10~19      | 1985-2003     | Decrease | <0.05          | 2007      | 1985-1997     | Stable   | 0.8            |
|            |               |          |                |           | 1988-2003     | Decrease | <0.05          |
| 20~24      | 1980-1993     | Decrease | <0.05          | 2008      | 1980-1988     | Stable   | 0.2            |
|            |               |          |                |           | 1984-1993     | Decrease | <0.05          |
| 25~29      | 1975-1988     | Stable   | 0.9            | 2007      | 1975-1982     | Increase | <0.05          |
|            |               |          |                |           | 1978-1988     | Decrease | <0.05          |
| 30~39      | 1965-1983     | Stable   | 0.3            | 2007      | 1965-1977     | Increase | <0.05          |
|            |               |          |                |           | 1968-1983     | Decrease | <0.05          |

**Appendix Figure 1. Joinpoint analysis of viral hepatitis and hepatitis B, hepatitis C, hepatitis A and hepatitis E**

**1.1 Viral hepatitis**

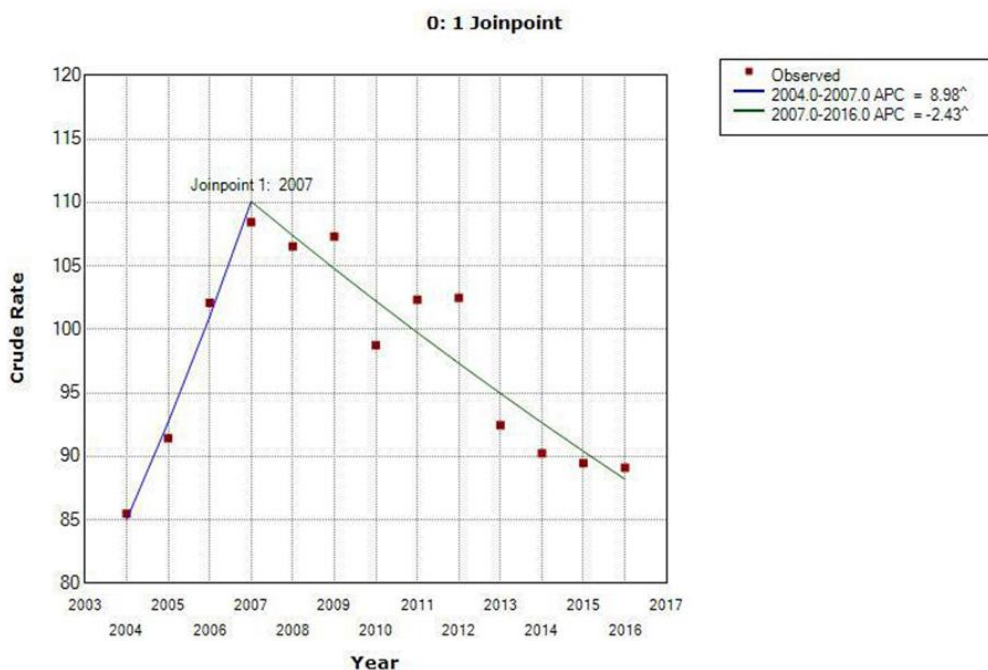

^ Indicates that the Annual Percent Change (APC) is significantly different from zero at the alpha = 0.05 level.  
Final Selected Model: 1 Joinpoint.

**1.2 Hepatitis B**

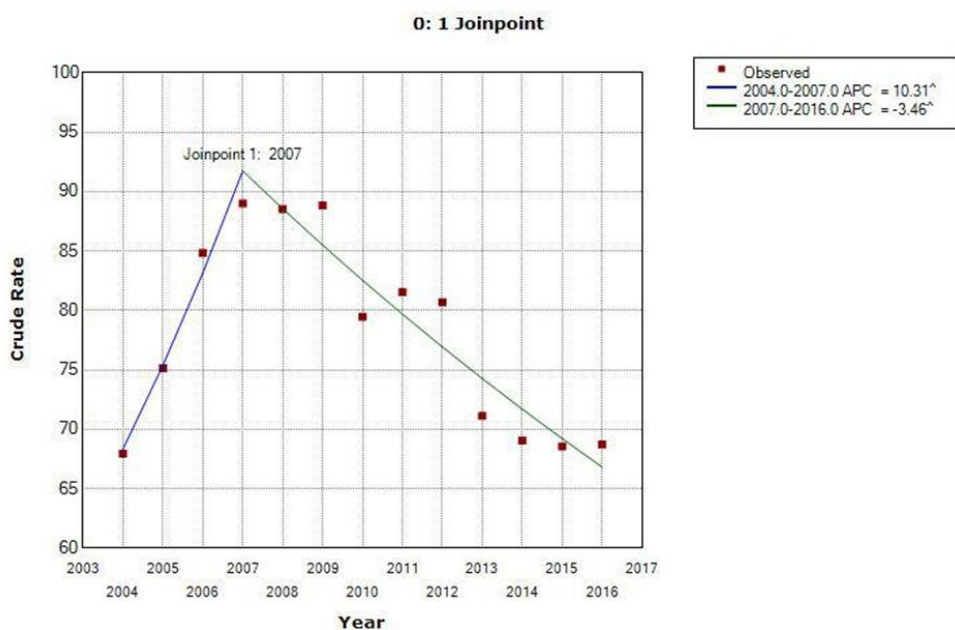

^ Indicates that the Annual Percent Change (APC) is significantly different from zero at the alpha = 0.05 level.  
Final Selected Model: 1 Joinpoint.

1.3 Hepatitis C

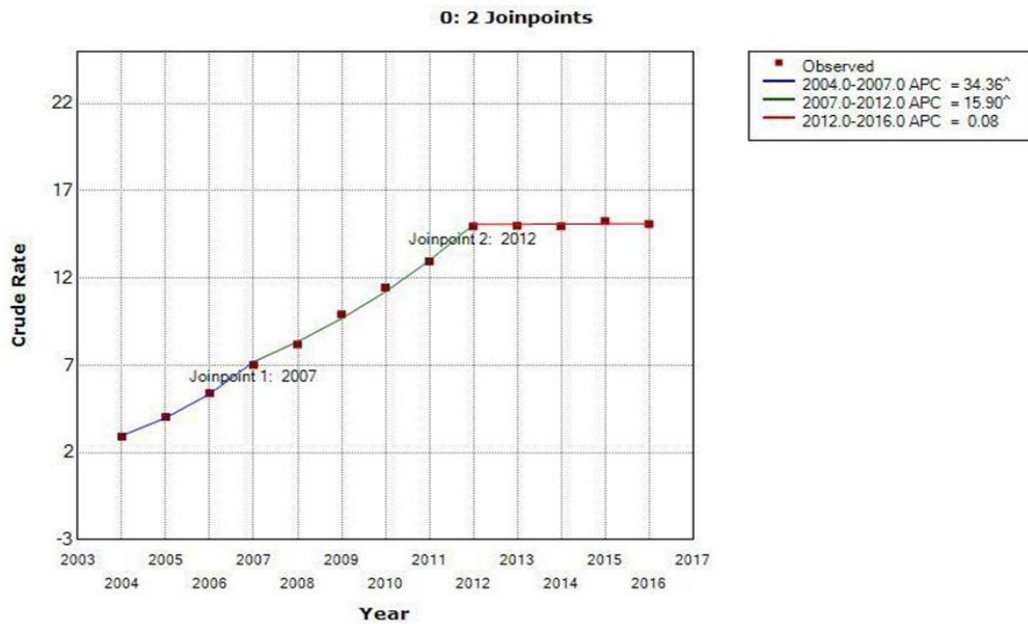

<sup>^</sup> Indicates that the Annual Percent Change (APC) is significantly different from zero at the alpha = 0.05 level.  
Final Selected Model: 2 Joinpoints.

1.4 Hepatitis A

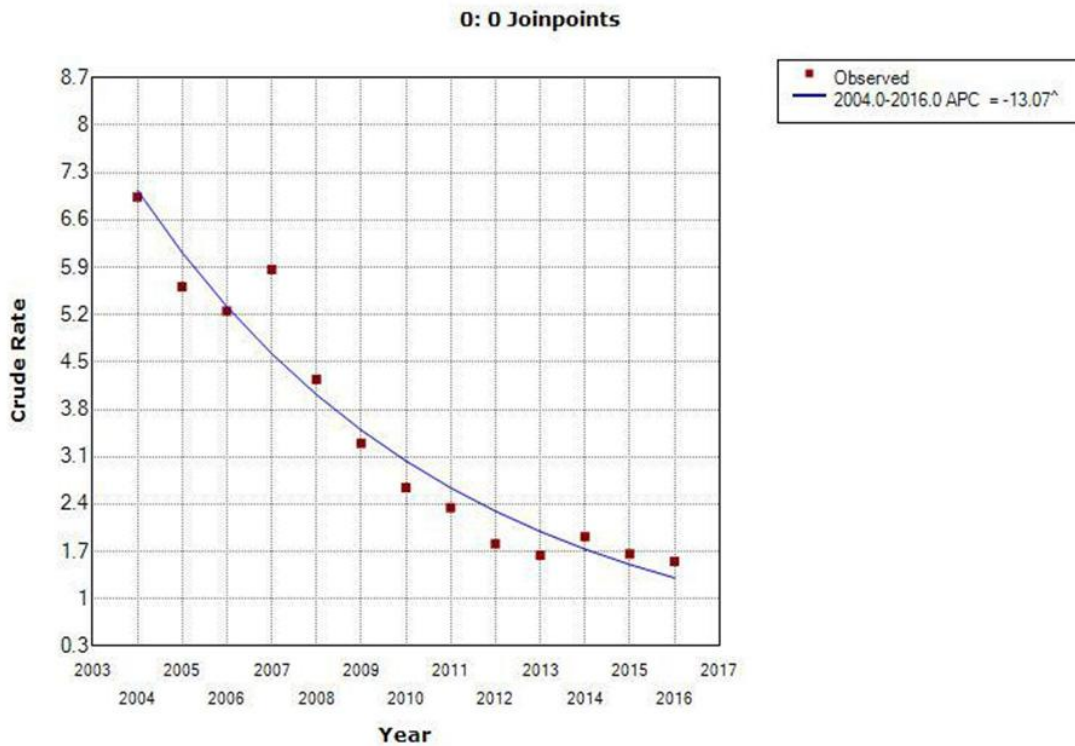

<sup>^</sup> Indicates that the Annual Percent Change (APC) is significantly different from zero at the alpha = 0.05 level.  
Final Selected Model: 0 Joinpoints.

1.5 Hepatitis E

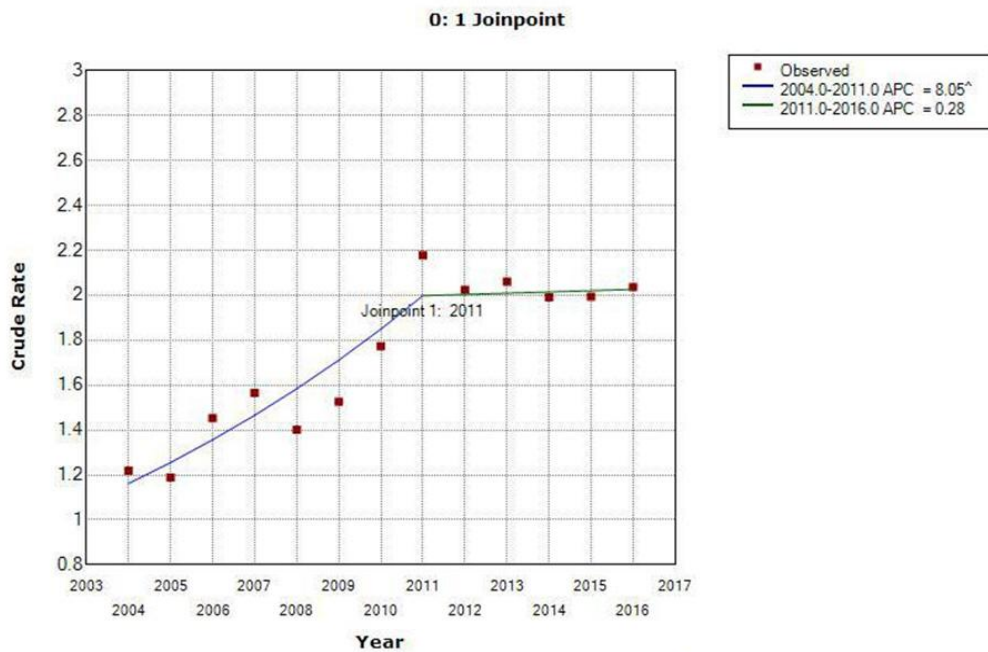

^ Indicates that the Annual Percent Change (APC) is significantly different from zero at the alpha = 0.05 level.  
Final Selected Model: 1 Joinpoint.

Review only



1  
2  
3  
4 **Appendix Figure 2: Reported incidence of viral hepatitis(2A), hepatitis B(2B),**  
5 **and hepatitis C(2C) in different provinces of China, 2015 (The authors generated**  
6 **all these maps by R language software, no copyright issue)**  
7  
8

9  
10 (2A)

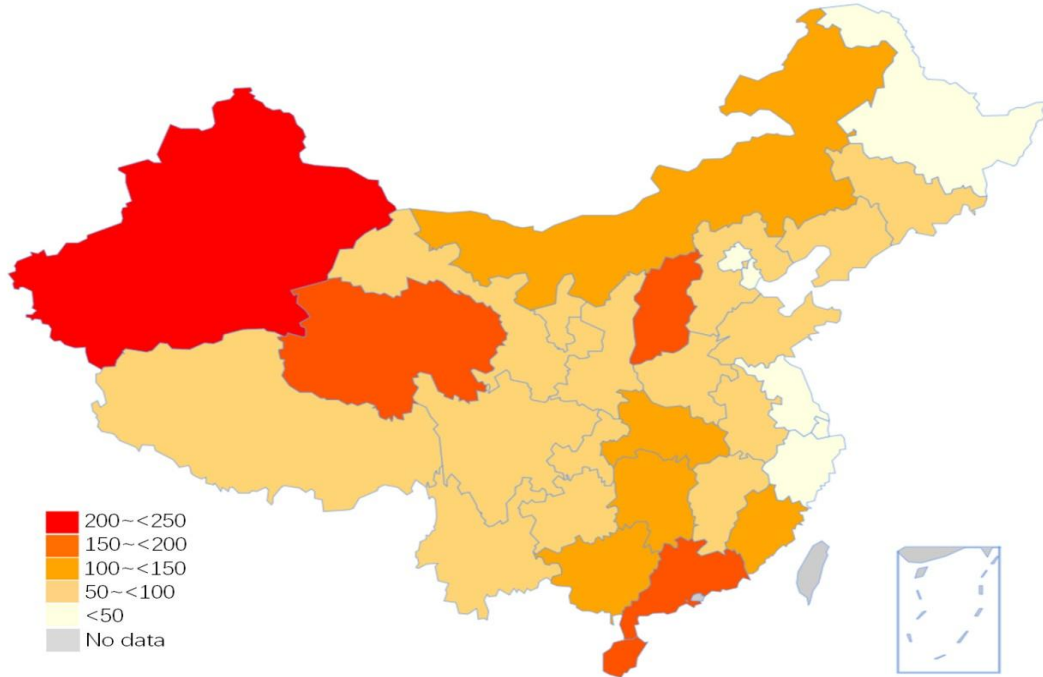

35 (2B)

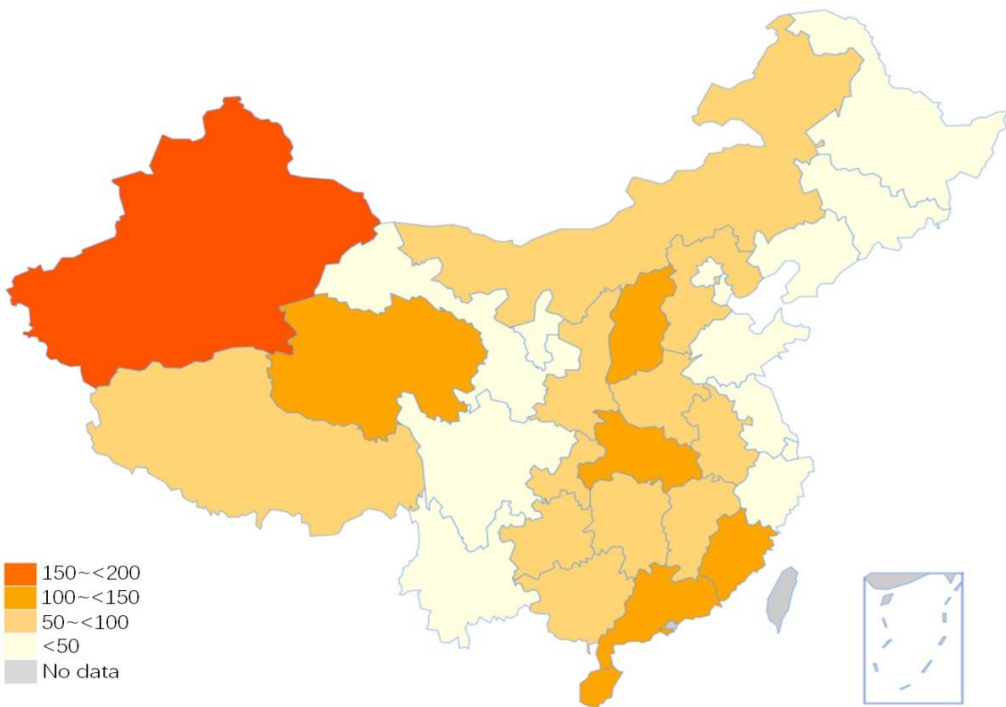

(2C)

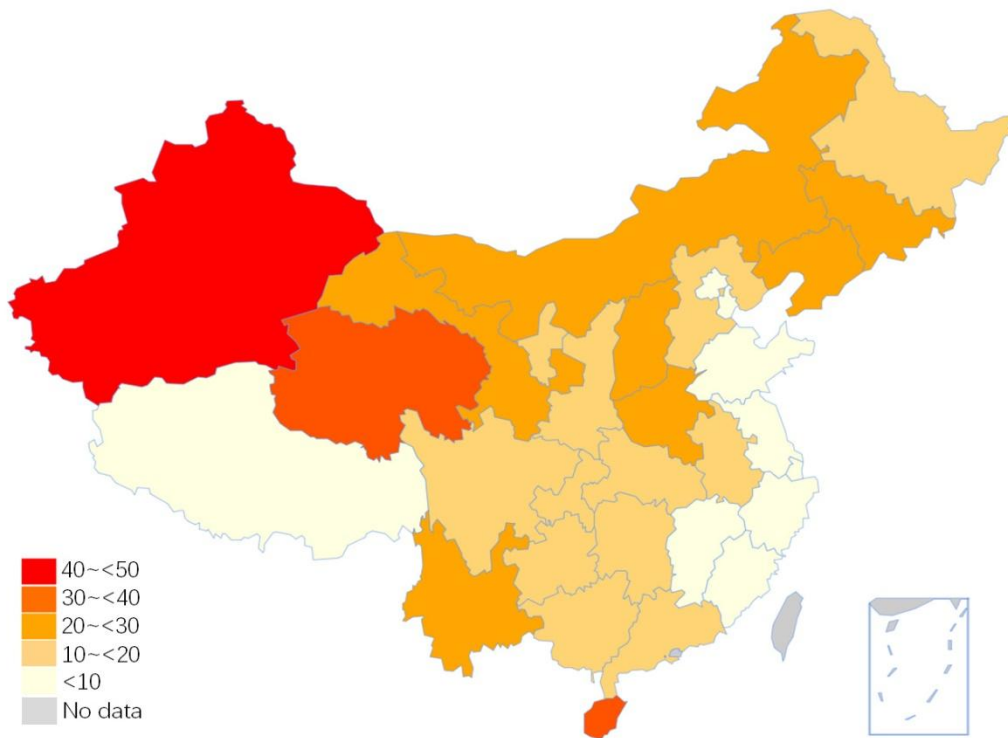

Data Source: National Health and Family Planning Commission of the People's Republic of China, Health and family planning statistical Yearbook of China, Beijing, 2016

Appendix Figure 3: Annual reported incidence of viral hepatitis overall in different provinces, China, 2004-2015

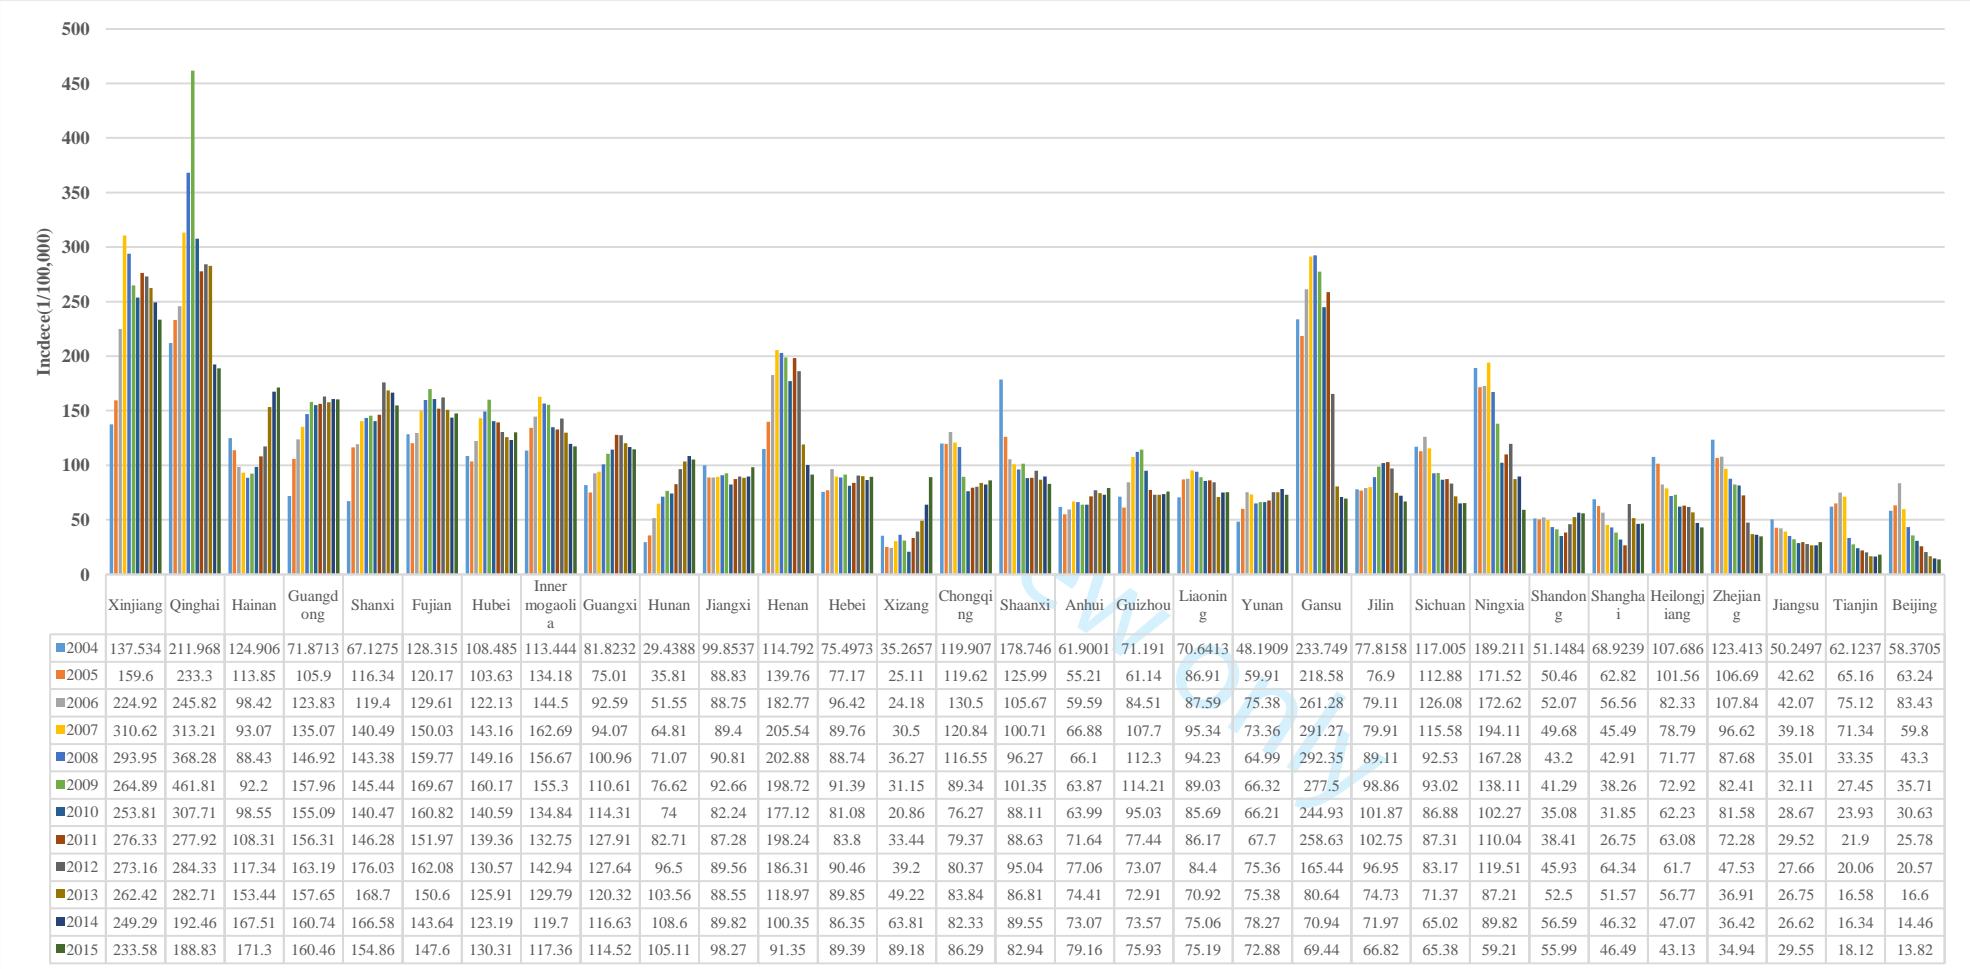

Data Source: China Center for Disease Control and Prevention. The Public Health Science Data Center. <http://www.phsciencedata.cn/Share/index.jsp>

**Appendix Figure 4. Heatmap of annual reported incidence of viral hepatitis in total and by different types of hepatitis, different data provinces of China, 2004-2015**

**4.1 Viral hepatitis**

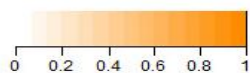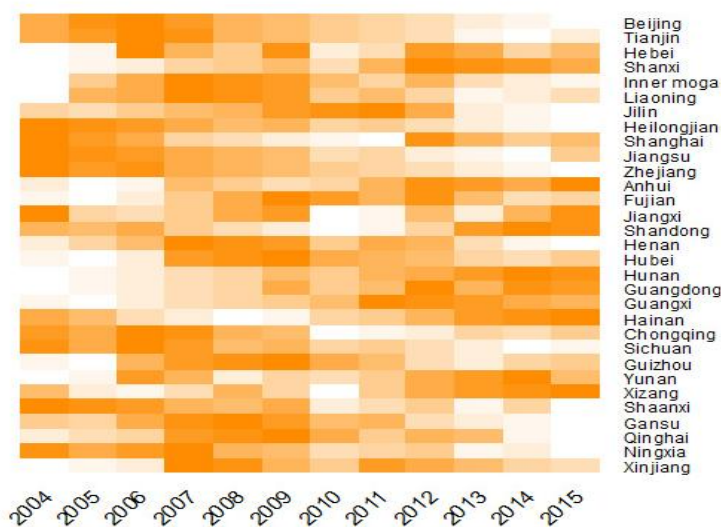

**4.2 Hepatitis B**

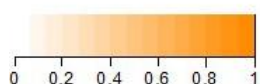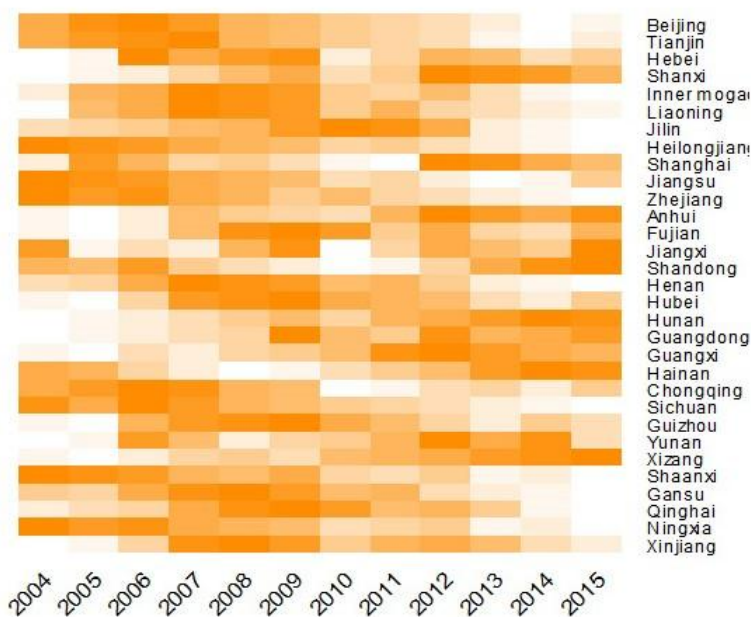

### 4.3 Hepatitis C

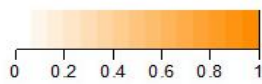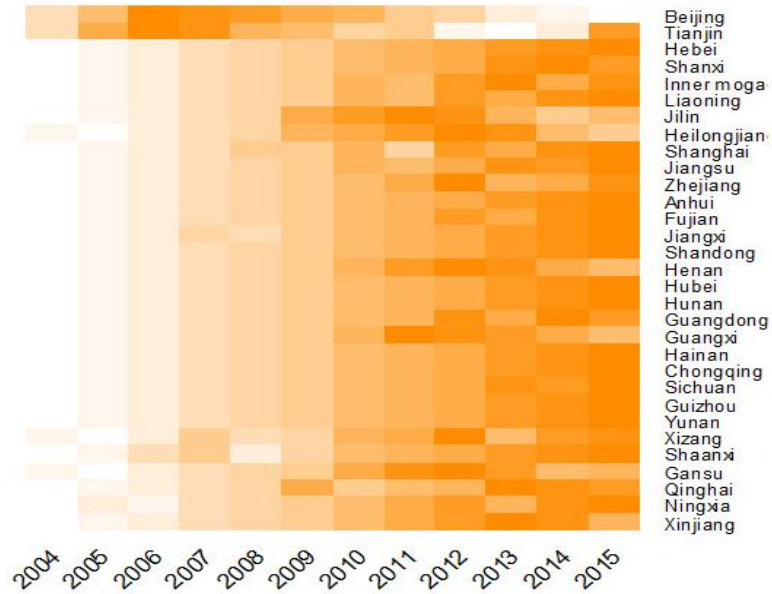

### 4.4 Hepatitis A

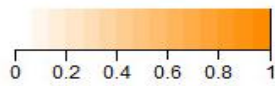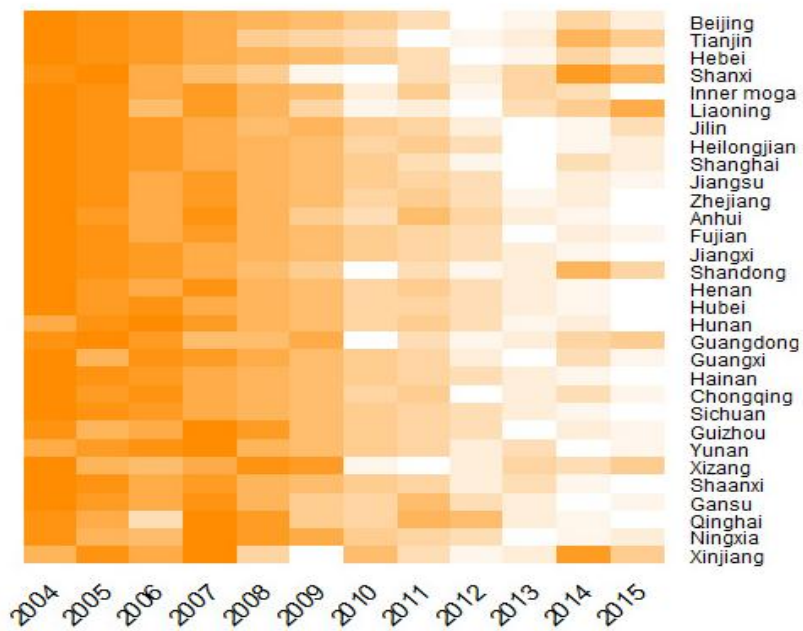

4.5 Hepatitis E

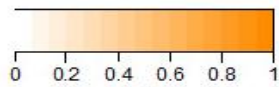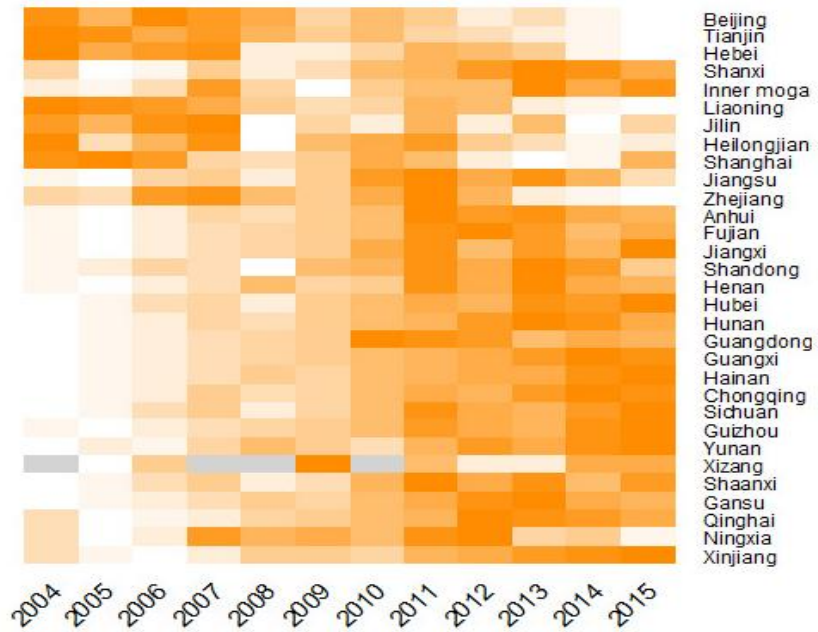

Lightgray: means that data were not available

Data Source: China Center for Disease Control and Prevention. The Public Health Science Data Center. <http://www.phsciencedata.cn/Share/index.jsp>

## STROBE Statement—checklist of items that should be included in reports of observational studies

|                                            | Item No | Recommendation                                                                                                                                                                                                                                                                                                                                                                                                                                                                                                                                                                                                                                                                                   |
|--------------------------------------------|---------|--------------------------------------------------------------------------------------------------------------------------------------------------------------------------------------------------------------------------------------------------------------------------------------------------------------------------------------------------------------------------------------------------------------------------------------------------------------------------------------------------------------------------------------------------------------------------------------------------------------------------------------------------------------------------------------------------|
| <b>Title and abstract</b><br>(Page 3)      | 1       | (a) Indicate the study's design with a commonly used term in the title or the abstract<br>(b) Provide in the abstract an informative and balanced summary of what was done and what was found                                                                                                                                                                                                                                                                                                                                                                                                                                                                                                    |
| <b>Introduction</b>                        |         |                                                                                                                                                                                                                                                                                                                                                                                                                                                                                                                                                                                                                                                                                                  |
| Background/rationale<br>(Page 4)           | 2       | Explain the scientific background and rationale for the investigation being reported                                                                                                                                                                                                                                                                                                                                                                                                                                                                                                                                                                                                             |
| Objectives<br>(Page 4)                     | 3       | State specific objectives, including any prespecified hypotheses                                                                                                                                                                                                                                                                                                                                                                                                                                                                                                                                                                                                                                 |
| <b>Methods</b>                             |         |                                                                                                                                                                                                                                                                                                                                                                                                                                                                                                                                                                                                                                                                                                  |
| Study design<br>(Page 4&5)                 | 4       | Present key elements of study design early in the paper                                                                                                                                                                                                                                                                                                                                                                                                                                                                                                                                                                                                                                          |
| Setting<br>(Page 4&5)                      | 5       | Describe the setting, locations, and relevant dates, including periods of recruitment, exposure, follow-up, and data collection                                                                                                                                                                                                                                                                                                                                                                                                                                                                                                                                                                  |
| Participants<br>(Page 4&5)                 | 6       | (a) <i>Cohort study</i> —Give the eligibility criteria, and the sources and methods of selection of participants. Describe methods of follow-up<br><i>Case-control study</i> —Give the eligibility criteria, and the sources and methods of case ascertainment and control selection. Give the rationale for the choice of cases and controls<br><i>Cross-sectional study</i> —Give the eligibility criteria, and the sources and methods of selection of participants<br>(b) <i>Cohort study</i> —For matched studies, give matching criteria and number of exposed and unexposed<br><i>Case-control study</i> —For matched studies, give matching criteria and the number of controls per case |
| Variables<br>(Page 5)                      | 7       | Clearly define all outcomes, exposures, predictors, potential confounders, and effect modifiers. Give diagnostic criteria, if applicable                                                                                                                                                                                                                                                                                                                                                                                                                                                                                                                                                         |
| Data sources/<br>measurement<br>(Page 4&5) | 8*      | For each variable of interest, give sources of data and details of methods of assessment (measurement). Describe comparability of assessment methods if there is more than one group                                                                                                                                                                                                                                                                                                                                                                                                                                                                                                             |
| Bias                                       | 9       | Describe any efforts to address potential sources of bias                                                                                                                                                                                                                                                                                                                                                                                                                                                                                                                                                                                                                                        |
| Study size<br>(Page 4)                     | 10      | Explain how the study size was arrived at                                                                                                                                                                                                                                                                                                                                                                                                                                                                                                                                                                                                                                                        |
| Quantitative variables<br>(Page 5)         | 11      | Explain how quantitative variables were handled in the analyses. If applicable, describe which groupings were chosen and why                                                                                                                                                                                                                                                                                                                                                                                                                                                                                                                                                                     |
| Statistical methods<br>(Page 5)            | 12      | (a) Describe all statistical methods, including those used to control for confounding<br>(b) Describe any methods used to examine subgroups and interactions<br>(c) Explain how missing data were addressed<br>(d) <i>Cohort study</i> —If applicable, explain how loss to follow-up was addressed<br><i>Case-control study</i> —If applicable, explain how matching of cases and controls was addressed<br><i>Cross-sectional study</i> —If applicable, describe analytical methods taking account of sampling strategy<br>(e) Describe any sensitivity analyses                                                                                                                                |

**Results**

|                                  |     |                                                                                                                                                                                                                                                                                                                                                                                                               |
|----------------------------------|-----|---------------------------------------------------------------------------------------------------------------------------------------------------------------------------------------------------------------------------------------------------------------------------------------------------------------------------------------------------------------------------------------------------------------|
| Participants<br>(Page 5&6)       | 13* | (a) Report numbers of individuals at each stage of study—eg numbers potentially eligible, examined for eligibility, confirmed eligible, included in the study, completing follow-up, and analysed<br>(b) Give reasons for non-participation at each stage<br>(c) Consider use of a flow diagram                                                                                                               |
| Descriptive data<br>(Page 5&6)   | 14* | (a) Give characteristics of study participants (eg demographic, clinical, social) and information on exposures and potential confounders<br>(b) Indicate number of participants with missing data for each variable of interest<br>(c) <i>Cohort study</i> —Summarise follow-up time (eg, average and total amount)                                                                                           |
| Outcome data<br>(Page 5&6&7&8)   | 15* | <i>Cohort study</i> —Report numbers of outcome events or summary measures over time<br><i>Case-control study</i> —Report numbers in each exposure category, or summary measures of exposure<br><i>Cross-sectional study</i> —Report numbers of outcome events or summary measures                                                                                                                             |
| Main results<br>(Page 5&6&7&8)   | 16  | (a) Give unadjusted estimates and, if applicable, confounder-adjusted estimates and their precision (eg, 95% confidence interval). Make clear which confounders were adjusted for and why they were included<br>(b) Report category boundaries when continuous variables were categorized<br>(c) If relevant, consider translating estimates of relative risk into absolute risk for a meaningful time period |
| Other analyses<br>(Page 5&6&7&8) | 17  | Report other analyses done—eg analyses of subgroups and interactions, and sensitivity analyses                                                                                                                                                                                                                                                                                                                |

**Discussion**

|                                    |    |                                                                                                                                                                            |
|------------------------------------|----|----------------------------------------------------------------------------------------------------------------------------------------------------------------------------|
| Key results<br>(Page 8&9&10)       | 18 | Summarise key results with reference to study objectives                                                                                                                   |
| Limitations<br>(Page 10)           | 19 | Discuss limitations of the study, taking into account sources of potential bias or imprecision. Discuss both direction and magnitude of any potential bias                 |
| Interpretation<br>(Page 8,9,10,11) | 20 | Give a cautious overall interpretation of results considering objectives, limitations, multiplicity of analyses, results from similar studies, and other relevant evidence |
| Generalisability<br>(Page 10&11)   | 21 | Discuss the generalisability (external validity) of the study results                                                                                                      |

**Other information**

|                      |    |                                                                                                                                                               |
|----------------------|----|---------------------------------------------------------------------------------------------------------------------------------------------------------------|
| Funding<br>(Page 11) | 22 | Give the source of funding and the role of the funders for the present study and, if applicable, for the original study on which the present article is based |
|----------------------|----|---------------------------------------------------------------------------------------------------------------------------------------------------------------|

\*Give information separately for cases and controls in case-control studies and, if applicable, for exposed and unexposed groups in cohort and cross-sectional studies.

**Note:** An Explanation and Elaboration article discusses each checklist item and gives methodological background and published examples of transparent reporting. The STROBE checklist is best used in conjunction with this article (freely available on the Web sites of PLoS Medicine at <http://www.plosmedicine.org/>, Annals of Internal Medicine at



1  
2  
3  
4  
5  
6  
7  
8  
9  
10  
11  
12  
13  
14  
15  
16  
17  
18  
19  
20  
21  
22  
23  
24  
25  
26  
27  
28  
29  
30  
31  
32  
33  
34  
35  
36  
37  
38  
39  
40  
41  
42  
43  
44  
45  
46  
47  
48  
49  
50  
51  
52  
53  
54  
55  
56  
57  
58  
59  
60

<http://www.annals.org/>, and *Epidemiology* at <http://www.epidem.com/>). Information on the STROBE Initiative is available at [www.strobe-statement.org](http://www.strobe-statement.org).

For peer review only
