# Supplementary material for: Changing incidence of reported viral hepatitis in China from 2004 to 2016: an observational study
Source: PubMed Central journal article supplement — BMJ Open. 2019 Aug 18;9(8):e028248. doi: 10.1136/bmjopen-2018-028248 (PMC6701656; doi:10.1136/bmjopen-2018-028248), 2019-08-18
Supplement: bmjopen-2018-028248supp001.pdf [file bmjopen-2018-028248supp001.pdf]

**Appendix Table1.****Web-based Clinical reporting form(CRF)**

|                             |                                       |                |                           |         |                 |                 |
|-----------------------------|---------------------------------------|----------------|---------------------------|---------|-----------------|-----------------|
| Name:                       | Family member's Name:                 | Date of birth: | Age:                      | Gender: | Marital status: | Family address: |
| ID number:                  | Telephone number:                     |                | Occupation:               |         |                 |                 |
| Degree of education:        | Nationality:                          |                | Report disease name:      |         |                 |                 |
| Classification of disease:  | i: Clinical diagnosis                 |                |                           |         |                 |                 |
|                             | ii: Laboratory confirmation diagnosis |                |                           |         |                 |                 |
|                             | iii: Suspected cases                  |                |                           |         |                 |                 |
|                             | iv: Pathogen carriers                 |                |                           |         |                 |                 |
| Dates of onset:             | Date of being diagnosed:              |                | Methods of diagnose:      |         | Date of death:  |                 |
| Date of completing the CRF: |                                       |                | Name of reporting doctor: |         |                 | Department:     |
