# Supplementary material for: Changing incidence of reported viral hepatitis in China from 2004 to 2016: an observational study
Source: PubMed Central journal article supplement — BMJ Open. 2019 Aug 18;9(8):e028248. doi: 10.1136/bmjopen-2018-028248 (PMC6701656; doi:10.1136/bmjopen-2018-028248), 2019-08-18
Supplement: bmjopen-2018-028248supp002.pdf [file bmjopen-2018-028248supp002.pdf]

**Appendix Table2.**

**Diagnostic criteria for viral hepatitis by the law on the prevention and control of infectious diseases of the People's Republic of China, 2004**

| Viral hepatitis             |                                                                                                                                                                                                                                                   |                                                                                                                                                                                                                                  |                                                                                                                                                |                                                                                                                                                                                                                     |
|-----------------------------|---------------------------------------------------------------------------------------------------------------------------------------------------------------------------------------------------------------------------------------------------|----------------------------------------------------------------------------------------------------------------------------------------------------------------------------------------------------------------------------------|------------------------------------------------------------------------------------------------------------------------------------------------|---------------------------------------------------------------------------------------------------------------------------------------------------------------------------------------------------------------------|
| <b>Clinical description</b> | (I).Recently, there has been a loss of appetite, nausea, refused fatty food, fatigue, jaundice, tea color urine, liver enlargement, liver pain, fatigue, etc, exclude other diseases;                                                             |                                                                                                                                                                                                                                  |                                                                                                                                                |                                                                                                                                                                                                                     |
| <b>Laboratory test</b>      | (II).Serum ALT elevated repeatedly and cannot be explained by other causes.                                                                                                                                                                       |                                                                                                                                                                                                                                  |                                                                                                                                                |                                                                                                                                                                                                                     |
| <b>Diagnose</b>             | Suspected cases:(I)+(II)                                                                                                                                                                                                                          |                                                                                                                                                                                                                                  |                                                                                                                                                |                                                                                                                                                                                                                     |
| <b>Classification</b>       | <b>Hepatitis A</b>                                                                                                                                                                                                                                | <b>Hepatitis B</b>                                                                                                                                                                                                               | <b>Hepatitis C</b>                                                                                                                             | <b>Hepatitis E</b>                                                                                                                                                                                                  |
| <b>Clinical description</b> | 1.One month (2-6 weeks) before the onset of illness, patients have been exposed to patients with Hepatitis A, or have been working or travelling, and eating, or directly coming from the prevalence area.                                        | 1. No more than half a year accepted treatment of blood and blood products, or have any medical damage such as insanitary injection, acupuncture, puncture, operation, or have a close contaction with HBV patients or carriers. | 1.Have received blood and blood products in half a year, or have any medical damage.                                                           | 1.Two months before the onset of the disease, patients had been exposed to hepatitis E infected patients, or went to the hepatitis E outbreak place, working, travelling, eating, or dinner together.               |
| <b>Laboratory test</b>      | 2.1 Serum ALT elevated.<br>2.2 Serum anti-HAV-IgM positive.<br>2.3 Double serum anti-HAV-IgG titer increased by four times during convalescence after acute infection.<br>2.4 immuno-electron microscopy found 27nm HAV's particles in the feces. | 2.1 Serum ALT elevated.<br>2.2 Serum HBsAg positive and anti-HBc IgM positive (greater than 1:1000) or HBV-DNA positive.                                                                                                         | 2.1 Serum ALT increased.<br>2.2 Not consistent with hepatitis A, hepatitis B, hepatitis E, CMV, EBV infection.<br>2.3 Serum anti-HCV positive. | 2.1 Serum ALT elevated.<br>2.2 Serum anti-HEV IgM positive.<br>2.3 The immune electron microscopy showed 30-32nm particles in feces.<br>2.4 It is not consistent with hepatitis A, hepatitis B, CMV, EBV infection. |
| <b>Diagnose</b>             | <b>Clinical diagnosis:</b> suspected cases+1+2.1<br><b>Laboratory confirmation</b>                                                                                                                                                                | <b>Clinical diagnosis:</b> suspected cases+1+2.1<br><b>Laboratory confirmation</b>                                                                                                                                               | <b>Clinical diagnosis:</b> suspected cases+2.1+2.2, with 1 as supporting evidence                                                              | <b>Clinical diagnosis:</b> suspected cases+2.1+2.4, with 1 as supporting evidence                                                                                                                                   |

|  |                                                                                     |                                       |                                                               |                                                                                                 |
|--|-------------------------------------------------------------------------------------|---------------------------------------|---------------------------------------------------------------|-------------------------------------------------------------------------------------------------|
|  | <b>diagnosis:</b> suspected cases+2.2 or suspected cases+2.3 or suspected cases+2.4 | <b>diagnosis:</b> suspected cases+2.2 | <b>Laboratory confirmation diagnosis:</b> suspected cases+2.3 | <b>Laboratory confirmation diagnosis:</b> in accordance with the clinical diagnosis +2.2 or 2.3 |
|--|-------------------------------------------------------------------------------------|---------------------------------------|---------------------------------------------------------------|-------------------------------------------------------------------------------------------------|
