# Supplementary material for: Changing incidence of reported viral hepatitis in China from 2004 to 2016: an observational study
Source: PubMed Central journal article supplement — BMJ Open. 2019 Aug 18;9(8):e028248. doi: 10.1136/bmjopen-2018-028248 (PMC6701656; doi:10.1136/bmjopen-2018-028248), 2019-08-18
Supplement: bmjopen-2018-028248supp003.pdf [file bmjopen-2018-028248supp003.pdf]

**Appendix Table 3. Total Population, reported cases of viral hepatitis in total and different categories in China, from 2004-2016**

| <b>Year</b> | <b>Total Population</b> | <b>Viral hepatitis (Rate)</b> | <b>HBV (Rate)</b> | <b>HCV (Rate)</b> | <b>HAV (Rate)</b> | <b>HEV (Rate)</b> |
|-------------|-------------------------|-------------------------------|-------------------|-------------------|-------------------|-------------------|
| 2004        | 1,348,440,164           | 1,152,874(85.50)              | 916,426(67.96)    | 39,381(2.92)      | 93,587(6.94)      | 16,444(1.22)      |
| 2005        | 1,307,513,434           | 1,195,355(91.42)              | 982,297(75.13)    | 52,927(4.05)      | 73,349(5.61)      | 15,541(1.19)      |
| 2006        | 1,307,566,387           | 1,334,859(102.09)             | 1,109,130(84.82)  | 70,681(5.41)      | 68,667(5.25)      | 19,007(1.45)      |
| 2007        | 1,314,481,770           | 1,425,428(108.44)             | 1,169,946(89.00)  | 92,378(7.03)      | 77,135(5.87)      | 20,577(1.57)      |
| 2008        | 1,321,305,046           | 1,407,664(106.54)             | 1,169,569(88.52)  | 108,446(8.21)     | 56,052(4.24)      | 18,525(1.40)      |
| 2009        | 1,328,023,190           | 1,425,020(107.30)             | 1,179,607(88.82)  | 131,849(9.93)     | 43,841(3.30)      | 20,275(1.53)      |
| 2010        | 1,334,701,299           | 1,317,982(98.75)              | 1,060,582(79.46)  | 153,039(11.47)    | 35,277(2.64)      | 23,682(1.77)      |
| 2011        | 1,340,936,879           | 1,372,344(102.34)             | 1,093,335(81.54)  | 173,872(12.97)    | 31,456(2.35)      | 29,202(2.18)      |
| 2012        | 1,347,349,640           | 1,380,800(102.48)             | 1,087,086(80.68)  | 201,622(14.96)    | 24,453(1.81)      | 27,271(2.02)      |
| 2013        | 1,354,058,016           | 1,251,872(92.45)              | 962,974(71.12)    | 203,155(15.00)    | 22,244(1.64)      | 27,902(2.06)      |
| 2014        | 1,355,173,143           | 1,223,021(90.25)              | 935,702(69.05)    | 202,803(14.97)    | 25,969(1.92)      | 26,988(1.99)      |
| 2015        | 1,362,466,732           | 1,218,946(89.47)              | 934,215(68.57)    | 207,897(15.26)    | 22,667(1.66)      | 27,169(1.99)      |
| 2016        | 1,370,784,890           | 1,221,479(89.11)              | 942,268(68.74)    | 206,832(15.09)    | 21,285(1.55)      | 27,922(2.04)      |

Rate: indicates the proportion of reported cases among total population, the unit is 1/100,000

Data from the Chinese Communicable Disease Control Center's website (<http://www.chinacdc.cn/>) and the Yearbooks of Health in the people's republic of China
