# Supplementary material for: Changing incidence of reported viral hepatitis in China from 2004 to 2016: an observational study
Source: PubMed Central journal article supplement — BMJ Open. 2019 Aug 18;9(8):e028248. doi: 10.1136/bmjopen-2018-028248 (PMC6701656; doi:10.1136/bmjopen-2018-028248), 2019-08-18
Supplement: bmjopen-2018-028248supp004.pdf [file bmjopen-2018-028248supp004.pdf]

# Appendix Figure 1. Joinpoint analysis of viral hepatitis and hepatitis B, hepatitis C, hepatitis A and hepatitis E

## 1.1 Viral hepatitis

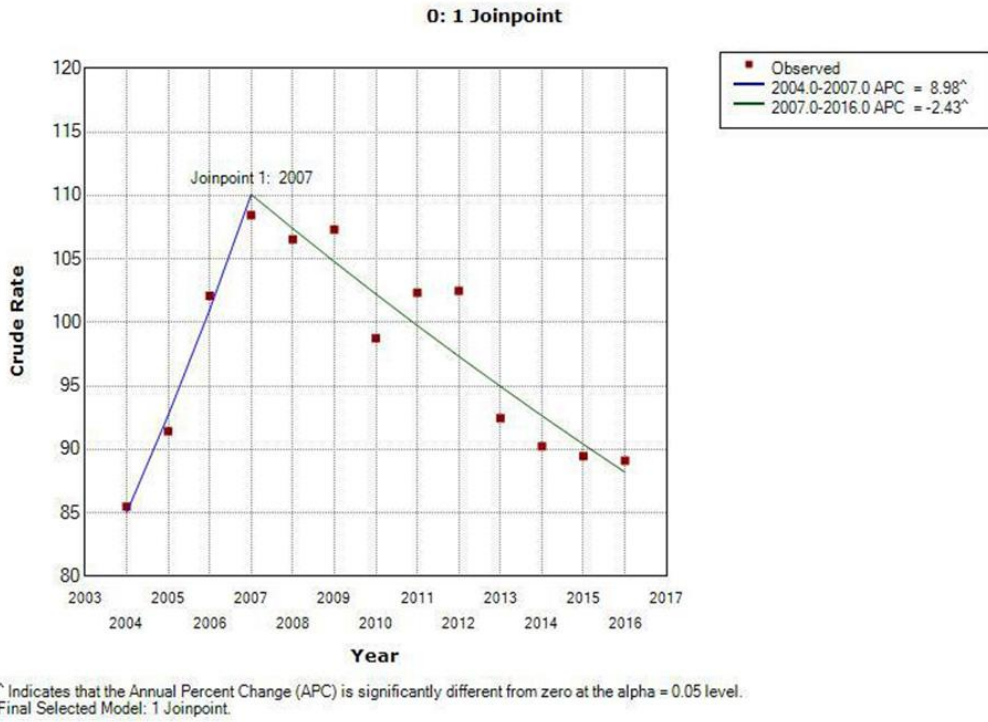

## 1.2 Hepatitis B

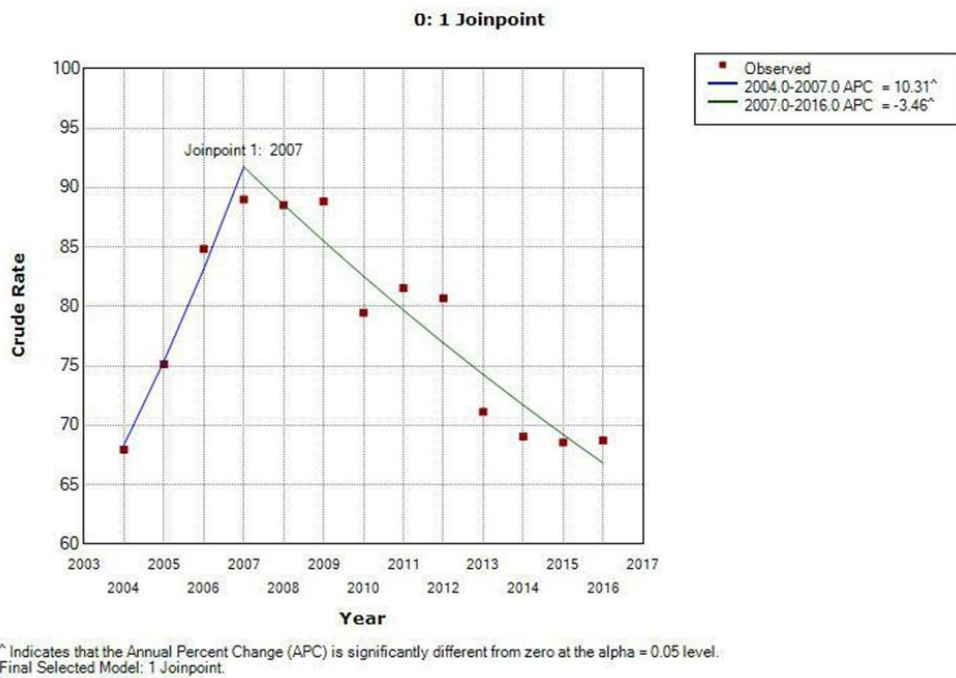

### 1.3 Hepatitis C

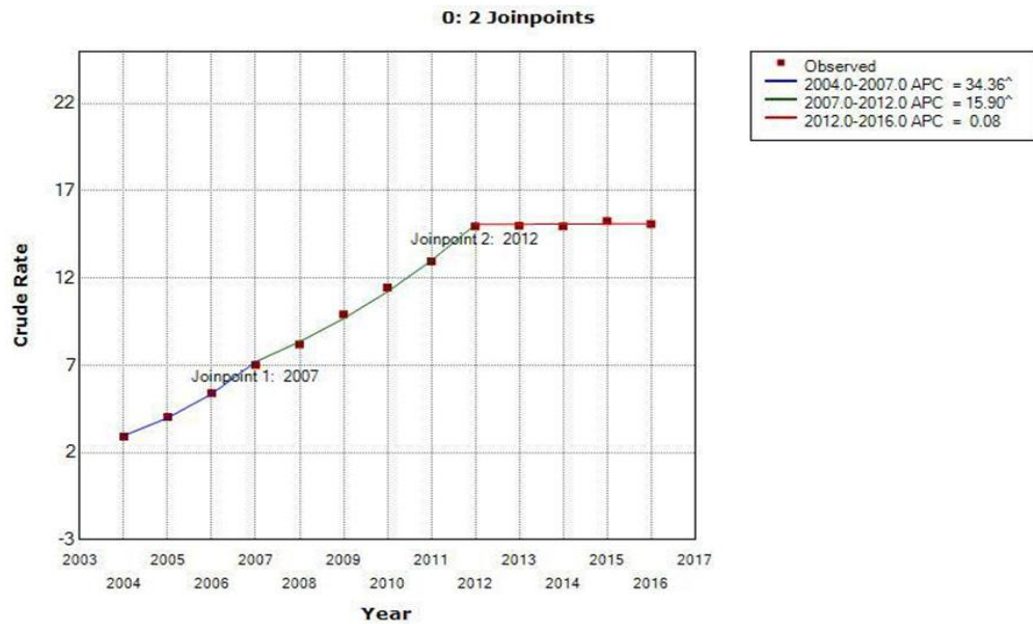

^ Indicates that the Annual Percent Change (APC) is significantly different from zero at the alpha = 0.05 level.  
Final Selected Model: 2 Joinpoints.

### 1.4 Hepatitis A

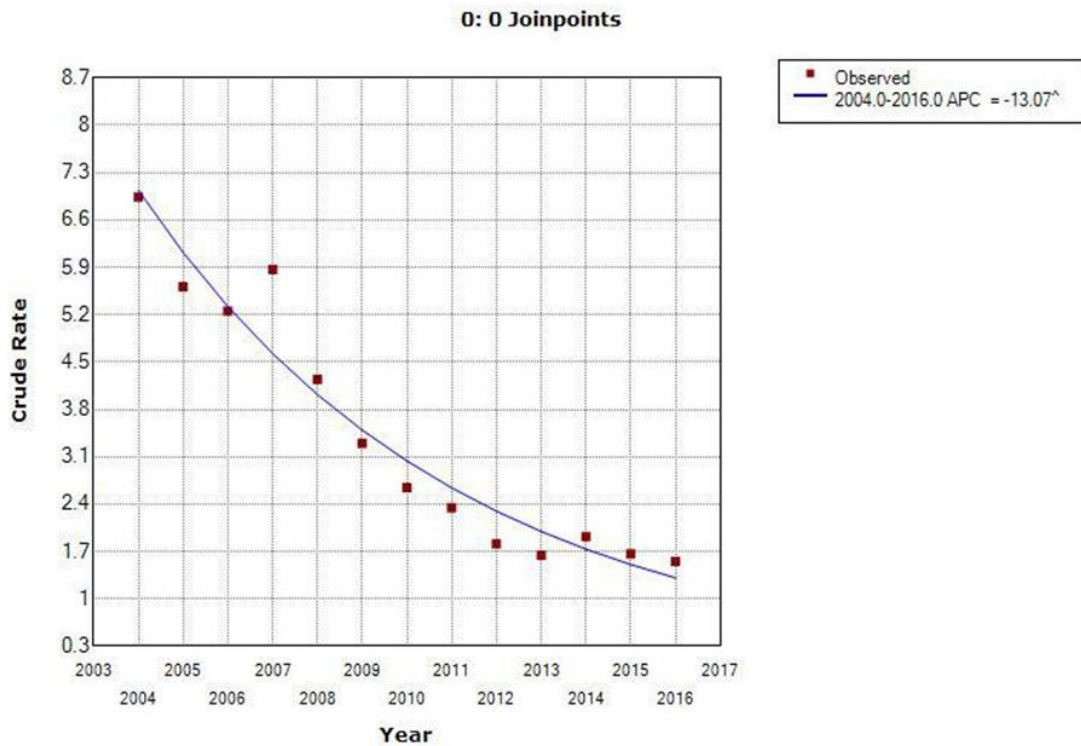

^ Indicates that the Annual Percent Change (APC) is significantly different from zero at the alpha = 0.05 level.  
Final Selected Model: 0 Joinpoints.

## 1.5 Hepatitis E

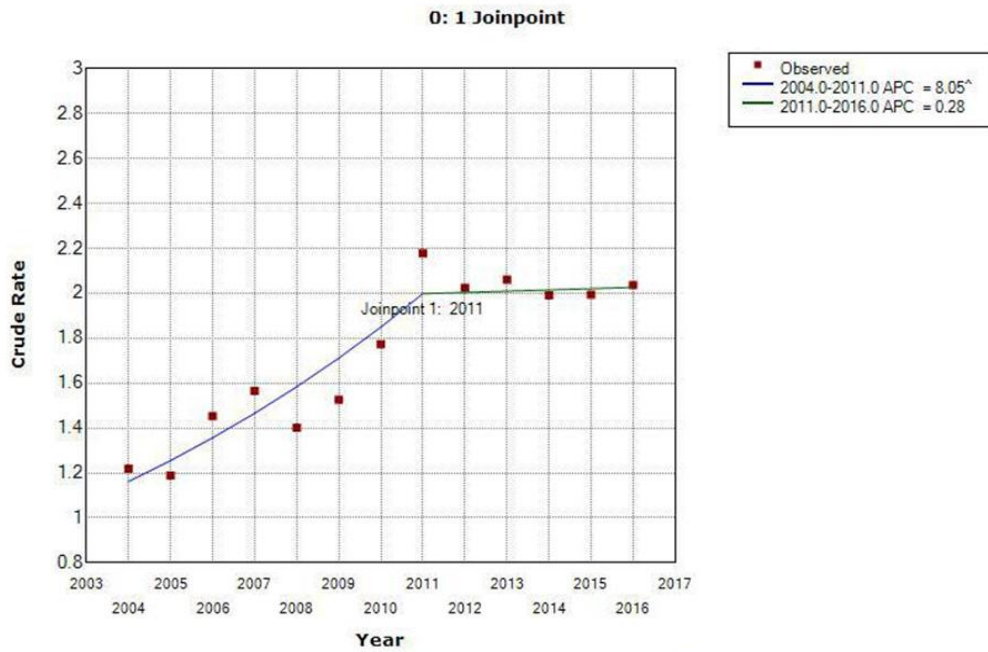

<sup>^</sup> Indicates that the Annual Percent Change (APC) is significantly different from zero at the alpha = 0.05 level.  
Final Selected Model: 1 Joinpoint.
