# Supplementary material for: Changing incidence of reported viral hepatitis in China from 2004 to 2016: an observational study
Source: PubMed Central journal article supplement — BMJ Open. 2019 Aug 18;9(8):e028248. doi: 10.1136/bmjopen-2018-028248 (PMC6701656; doi:10.1136/bmjopen-2018-028248), 2019-08-18
Supplement: bmjopen-2018-028248supp005.pdf [file bmjopen-2018-028248supp005.pdf]

**Appendix Table 4. Average annual percentage change(AAPC) and Annual percentage change(APC) of reported incidence of Viral hepatitis, hepatitis B, hepatitis C, hepatitis A, hepatitis E, with age distribution**

| Viral hepatitis | Year      | AAPC/APC(95%CI)  |                      | Trend | P-Value  |       |
|-----------------|-----------|------------------|----------------------|-------|----------|-------|
|                 | 2004-2016 | AAPC             | 0.3%(-0.9~1.5)       |       | Stable   | 0.6   |
| Viral hepatitis | 2004-2007 | APC <sup>1</sup> | 9.0%(3.7~14.6)       |       | Increase | <0.05 |
|                 | 2007-2016 | APC <sup>2</sup> | -2.4%(-3.3~-1.6)     |       | Decrease | <0.05 |
| HBV             | Year      | AAPC/APC(95%CI)  |                      | Trend | P-Value  |       |
|                 | 2004-2016 | AAPC             | -0.2%(-1.6~1.2)      |       | Stable   | 0.8   |
|                 | 2004-2007 | APC <sup>1</sup> | 10.3%(4.1~16.9)      |       | Increase | <0.05 |
|                 | 2007-2016 | APC <sup>2</sup> | -3.5%(-4.5~-2.5)     |       | Decrease | <0.05 |
| HCV             | Year      | AAPC/APC(95%CI)  |                      | Trend | P-Value  |       |
|                 | 2004-2016 | AAPC             | 14.5%(13.1~15.9)     |       | Increase | <0.05 |
|                 | 2004-2007 | APC <sup>1</sup> | 34.4%(27.7~41.3)     |       | Increase | <0.05 |
|                 | 2007-2012 | APC <sup>2</sup> | 15.9%(13.6~18.2)     |       | Increase | <0.05 |
|                 | 2012-2016 | APC <sup>3</sup> | 0.1%(-1.5~1.7)       |       | Stable   | 0.9   |
| HAV             | Year      | AAPC/APC(95%CI)  |                      | Trend | P-Value  |       |
|                 | 2004-2016 | AAPC             | -13.1%(-15.1, -11.0) |       | Decrease | <0.05 |
| HEV             | Year      | AAPC/APC(95%CI)  |                      | Trend | P-Value  |       |
|                 | 2004-2016 | AAPC             | 4.7%(2.8~6.7)        |       | Increase | <0.05 |
|                 | 2004-2011 | APC <sup>1</sup> | 8.1%(5.2~11.0)       |       | Increase | <0.05 |
|                 | 2011-2016 | APC <sup>2</sup> | 0.3%(-3.4~4.1)       |       | Stable   | 0.9   |

APCC: Average annual percentage change; APC:Annual percentage change; HBV: Hepatitis B, HCV: Hepatitis C, HAV: Hepatitis A, HEV: Hepatitis E.
