# Supplementary material for: Changing incidence of reported viral hepatitis in China from 2004 to 2016: an observational study
Source: PubMed Central journal article supplement — BMJ Open. 2019 Aug 18;9(8):e028248. doi: 10.1136/bmjopen-2018-028248 (PMC6701656; doi:10.1136/bmjopen-2018-028248), 2019-08-18
Supplement: bmjopen-2018-028248supp006.pdf [file bmjopen-2018-028248supp006.pdf]

**Appendix Table 5. Average annual percentage change(AAPC) and Annual percentage change(APC) of reported incidence of hepatitis B, hepatitis C, hepatitis A, hepatitis E, with age distribution**

| <b>HBV</b>        | <b>Year</b> | <b>AAPC/APC(95%CI)</b> |                     | <b>Trend</b> | <b>P-Value</b> |
|-------------------|-------------|------------------------|---------------------|--------------|----------------|
| <b>Age&lt;1</b>   | 2004-2013   | APC                    | 0.4%(-2.7~3.6)      | Stable       | 0.8            |
| <b>1~9</b>        | 2004-2013   | AAPC                   | -15.5%(-18.4~-12.4) | Decrease     | <0.05          |
|                   | 2004-2006   | APC <sup>1</sup>       | -3.9%(-18.8~13.7)   | Decrease     | 0.6            |
|                   | 2006-2013   | APC <sup>2</sup>       | -18.5%(-21.3~-15.5) | Decrease     | <0.05          |
| <b>10~19</b>      | 2004-2013   | AAPC                   | -12.1%(-14.4~-9.7)  | Decrease     | <0.05          |
|                   | 2004-2007   | APC <sup>1</sup>       | 0.9%(-6.1~8.4)      | Stable       | 0.8            |
|                   | 2007-2013   | APC <sup>2</sup>       | -18.0%(-21.1~-14.7) | Decrease     | <0.05          |
| <b>20~24</b>      | 2004-2013   | AAPC                   | -4.4%(-7.7~-1.0)    | Decrease     | <0.05          |
|                   | 2004-2008   | APC <sup>1</sup>       | 4.3%(-3.4~12.6)     | Stable       | 0.2            |
|                   | 2008-2013   | APC <sup>2</sup>       | -10.8%(-15.7~-5.7)  | Decrease     | <0.05          |
| <b>25~29</b>      | 2004-2013   | AAPC                   | 0.2%(-2.0~2.5)      | Stable       | 0.9            |
|                   | 2004-2007   | APC <sup>1</sup>       | 10.9%(3.1~19.4)     | Increase     | <0.05          |
|                   | 2007-2013   | APC <sup>2</sup>       | -4.8%(-7.1~-2.4)    | Decrease     | <0.05          |
| <b>30~39</b>      | 2004-2013   | AAPC                   | -1.1%(-1.0~3.2)     | Stable       | 0.3            |
|                   | 2004-2007   | APC <sup>1</sup>       | 12.0%(4.8~19.7)     | Increase     | <0.05          |
|                   | 2007-2013   | APC <sup>2</sup>       | -3.9%(-6.1~-1.7)    | Decrease     | <0.05          |
| <b>40~49</b>      | 2004-2013   | AAPC                   | 1.2%(-1.2~3.5)      | Stable       | 0.3            |
|                   | 2004-2006   | APC <sup>1</sup>       | 6.8%(2.7~11.0)      | Stable       | <0.05          |
|                   | 2006-2013   | APC <sup>2</sup>       | -5.5%(-9.9~-0.8)    | Decrease     | <0.05          |
| <b>50~59</b>      | 2004-2013   | APC                    | 2.5%(0.8~4.3)       | Increase     | <0.05          |
| <b>60~69</b>      | 2004-2013   | AAPC                   | 7.1%(4.9~9.4)       | Increase     | <0.05          |
|                   | 2004-2008   | APC <sup>1</sup>       | 14.3%(8.7~20.3)     | Increase     | <0.05          |
|                   | 2008-2013   | APC <sup>2</sup>       | 1.6%(-1.1~4.5)      | Stable       | 0.2            |
| <b>70~79</b>      | 2004-2013   | AAPC                   | 6.4%(3.8~9.0)       | Increase     | <0.05          |
|                   | 2004-2009   | APC <sup>1</sup>       | 12.0%(7.3~16.9)     | Increase     | <0.05          |
|                   | 2009-2013   | APC <sup>2</sup>       | -0.2%(-4.8~4.7)     | Stable       | 0.9            |
| <b>Age&gt;=80</b> | 2004-2013   | AAPC                   | 6.8%(4.8~8.9)       | Increase     | <0.05          |
|                   | 2004-2009   | APC <sup>1</sup>       | 18.5%(14.4~22.8)    | Increase     | <0.05          |
|                   | 2009-2013   | APC <sup>2</sup>       | -6.1%(-9.4~-2.8)    | Decrease     | <0.05          |
| <b>HCV</b>        | <b>Year</b> | <b>AAPC/APC(95%CI)</b> |                     | <b>Trend</b> | <b>P-Value</b> |
| <b>Age&lt;1</b>   | 2004-2013   | AAPC                   | 23.2%(13.1~34.2)    | Increase     | <0.05          |
|                   | 2004-2007   | APC <sup>1</sup>       | 50.0%(9.2~106.0)    | Increase     | <0.05          |
|                   | 2007-2013   | APC <sup>2</sup>       | 11.7%(5.5~18.2)     | Increase     | <0.05          |
| <b>1~9</b>        | 2004-2013   | APC                    | 25.9%(15.9~36.8)    | Increase     | <0.05          |
| <b>10~19</b>      | 2004-2013   | AAPC                   | 10.4%(6.9~14.0)     | Increase     | <0.05          |
|                   | 2004-2011   | APC <sup>1</sup>       | 15.3%(12.4~18.3)    | Increase     | <0.05          |
|                   | 2011-2013   | APC <sup>2</sup>       | -5.1%(-19.7~12.1)   | Stable       | 0.5            |
| <b>20~29</b>      | 2004-2013   | AAPC                   | 14.2%(9.7~18.8)     | Increase     | <0.05          |
|                   | 2004-2007   | APC <sup>1</sup>       | 31.6%(14.0~51.8)    | Increase     | <0.05          |

|            |             |                        |                     |              |                |
|------------|-------------|------------------------|---------------------|--------------|----------------|
|            | 2007-2013   | APC <sup>2</sup>       | 6.3%(3.0~9.8)       | Increase     | <0.05          |
| 30~39      | 2004-2013   | AAPC                   | 17.7%(13.8~21.9)    | Increase     | <0.05          |
|            | 2004-2009   | APC <sup>1</sup>       | 29.7%(21.5~38.4)    | Increase     | <0.05          |
|            | 2009-2013   | APC <sup>2</sup>       | 4.4%(-1.8~10.9)     | Stable       | 0.1            |
| 40~49      | 2004-2013   | AAPC                   | 18.8%(15.8~21.9)    | Increase     | <0.05          |
|            | 2004-2011   | APC <sup>1</sup>       | 24.0%(20.5~27.5)    | Increase     | <0.05          |
|            | 2011-2013   | APC <sup>2</sup>       | 2.5%(-8.7~15.1)     | Stable       | 0.6            |
| 50~59      | 2004-2013   | AAPC                   | 19.5%(17.4~21.7)    | Increase     | <0.05          |
| 60~69      | 2004-2013   | AAPC                   | 18.1% (15.6~20.7)   | Increase     | <0.05          |
|            | 2004-2009   | APC <sup>1</sup>       | 23.7% (18.6~29.0)   | Increase     | <0.05          |
|            | 2009-2013   | APC <sup>2</sup>       | 11.5% (7.8~15.4)    | Increase     | <0.05          |
| 70~79      | 2004-2013   | AAPC                   | 14.0% (10.9~17.2)   | Increase     | <0.05          |
|            | 2004-2009   | APC <sup>1</sup>       | 21.0% (14.7~27.6)   | Increase     | <0.05          |
|            | 2009-2013   | APC <sup>2</sup>       | 5.8%(0.9~11.0)      | Increase     | <0.05          |
| Age>=80    | 2004-2013   | AAPC                   | 12.6%(9.5~15.8)     | Increase     | <0.05          |
|            | 2004-2010   | APC <sup>1</sup>       | 24.6%(19.6~29.9)    | Increase     | <0.05          |
|            | 2010-2013   | APC <sup>2</sup>       | -8.1%(-14.6~-1.2)   | Increase     | <0.05          |
|            |             |                        |                     |              |                |
| <b>HAV</b> | <b>Year</b> | <b>AAPC/APC(95%CI)</b> |                     | <b>Trend</b> | <b>P-Value</b> |
| Age<1      | 2004-2013   | APC                    | -11.1%(-15.9~-5.9)  | Decrease     | <0.05          |
| 1~4        | 2004-2013   | APC                    | -12.3%(-19.2~-4.9)  | Decrease     | <0.05          |
| 5~9        | 2004-2013   | AAPC                   | -20.1%(-22.4~-17.7) | Decrease     | <0.05          |
|            | 2004-2007   | APC <sup>1</sup>       | 9.7%(2.0~17.9)      | Increase     | <0.05          |
|            | 2007-2013   | APC <sup>2</sup>       | -31.7%(-34.8~-28.6) | Decrease     | <0.05          |
| 10~19      | 2004-2013   | AAPC                   | -16.6%(-19.4~-13.7) | Decrease     | <0.05          |
|            | 2004-2007   | APC <sup>1</sup>       | 2.3%(-6.1~11.5)     | Stable       | 0.5            |
|            | 2007-2013   | APC <sup>2</sup>       | -24.8%(-28.5~-20.8) | Decrease     | <0.05          |
| 20~29      | 2004-2013   | APC                    | -16.7%(-18.9~-14.5) | Decrease     | <0.05          |
|            | 2004-2007   | APC <sup>1</sup>       | -5.8%(-12.3~1.1)    | Stable       | 0.1            |
|            | 2007-2013   | APC <sup>2</sup>       | -21.7%(-24.5~-18.7) | Decrease     | <0.05          |
| 30~39      | 2004-2013   | APC                    | -15.1%(-16.8~-13.4) | Decrease     | <0.05          |
| 40~49      | 2004-2013   | APC                    | -14.3%(-15.9~-12.7) | Decrease     | <0.05          |
| 50~59      | 2004-2013   | APC                    | -16.1%(-19.2~-12.9) | Decrease     | <0.05          |
| 60~69      | 2004-2013   | APC                    | -11.6%(-13.1~-10.1) | Decrease     | <0.05          |
| 70~79      | 2004-2013   | APC                    | -10.1%(-12.0~-8.2)  | Decrease     | <0.05          |
| Age>=80    | 2004-2013   | APC                    | -6.7%(-9.3~-3.9)    | Decrease     | <0.05          |
| <b>HEV</b> | <b>Year</b> | <b>AAPC/APC(95%CI)</b> |                     | <b>Trend</b> | <b>P-Value</b> |
| Age<1      | 2004-2013   | APC                    | 5.8%(0.7~11.2)      | Increase     | <0.05          |
| 1~9        | 2004-2013   | APC                    | 3.0%(-2.0~8.2)      | Stable       | 0.2            |
| 10~19      | 2004-2013   | APC                    | 6.8%(3.3~10.5)      | Increase     | <0.05          |
| 20~29      | 2004-2013   | APC                    | 4.5%(1.5~7.7)       | Increase     | <0.05          |

|                   |           |                  |                  |          |       |
|-------------------|-----------|------------------|------------------|----------|-------|
| <b>30~39</b>      | 2004-2013 | APC              | 5.4%(2.9~7.9)    | Increase | <0.05 |
| <b>40~49</b>      | 2004-2013 | APC              | 3.6%(0.8~6.5)    | Increase | <0.05 |
| <b>50~59</b>      | 2004-2013 | APC              | 4.2%(1.1~7.4)    | Increase | <0.05 |
| <b>60~69</b>      | 2004-2013 | APC              | 7.1%(4.7~9.6)    | Increase | <0.05 |
| <b>70~79</b>      | 2004-2013 | APC              | 4.6%(2.8~6.3)    | Increase | <0.05 |
| <b>Age&gt;=80</b> | 2004-2013 | APC              | 6.2%(2.7~9.9)    | Increase | <0.05 |
|                   | 2004-2011 | APC <sup>1</sup> | 10.6%(2.1~14.2)  | Increase | <0.05 |
|                   | 2011-2013 | APC <sup>2</sup> | -7.6%(-21.6~8.9) | Decrease | 0.3   |

APCC: Average annual percentage change; APC: Annual percentage change; HBV: Hepatitis B, HCV: Hepatitis C, HAV: Hepatitis A, HEV: Hepatitis E.
