# Supplementary material for: Changing incidence of reported viral hepatitis in China from 2004 to 2016: an observational study
Source: PubMed Central journal article supplement — BMJ Open. 2019 Aug 18;9(8):e028248. doi: 10.1136/bmjopen-2018-028248 (PMC6701656; doi:10.1136/bmjopen-2018-028248), 2019-08-18
Supplement: bmjopen-2018-028248supp007.pdf [file bmjopen-2018-028248supp007.pdf]

**Appendix Figure 2: Reported incidence of viral hepatitis(2A), hepatitis B(2B), and hepatitis C(2C) in different provinces of China, 2015 (The authors generated all these maps by R language software, no copyright issue)**

**(2A)**

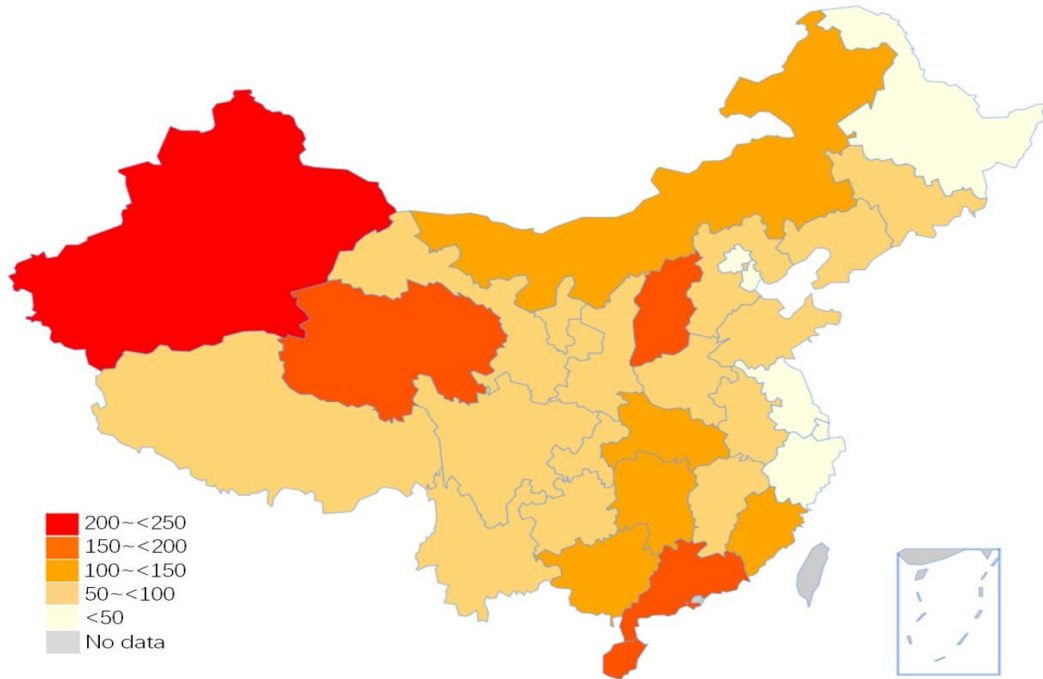

**(2B)**

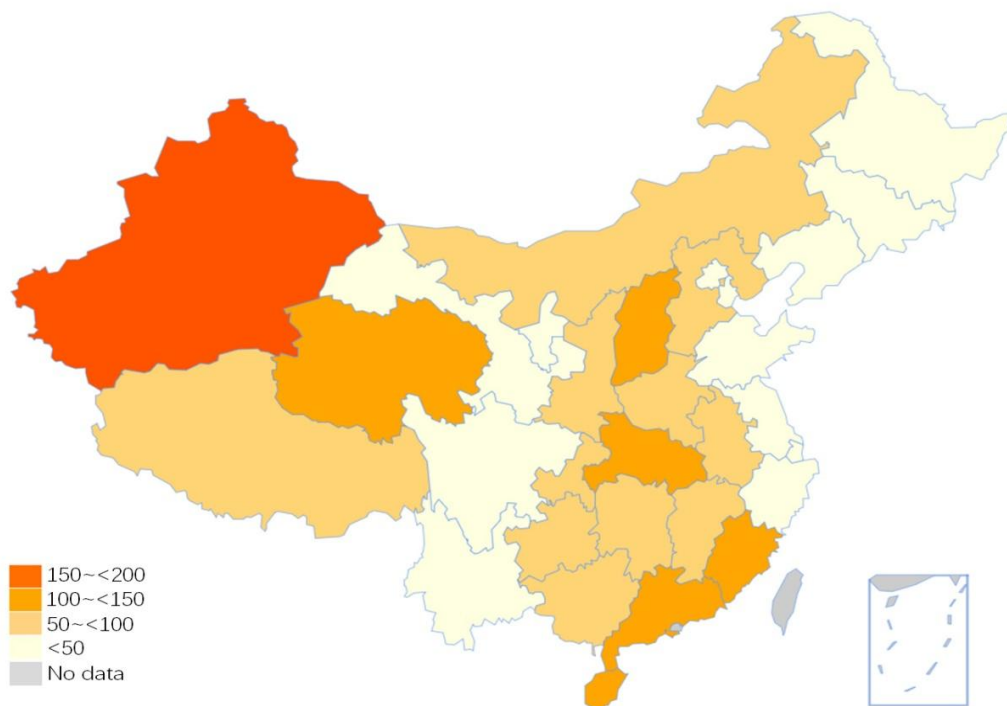

(2C)

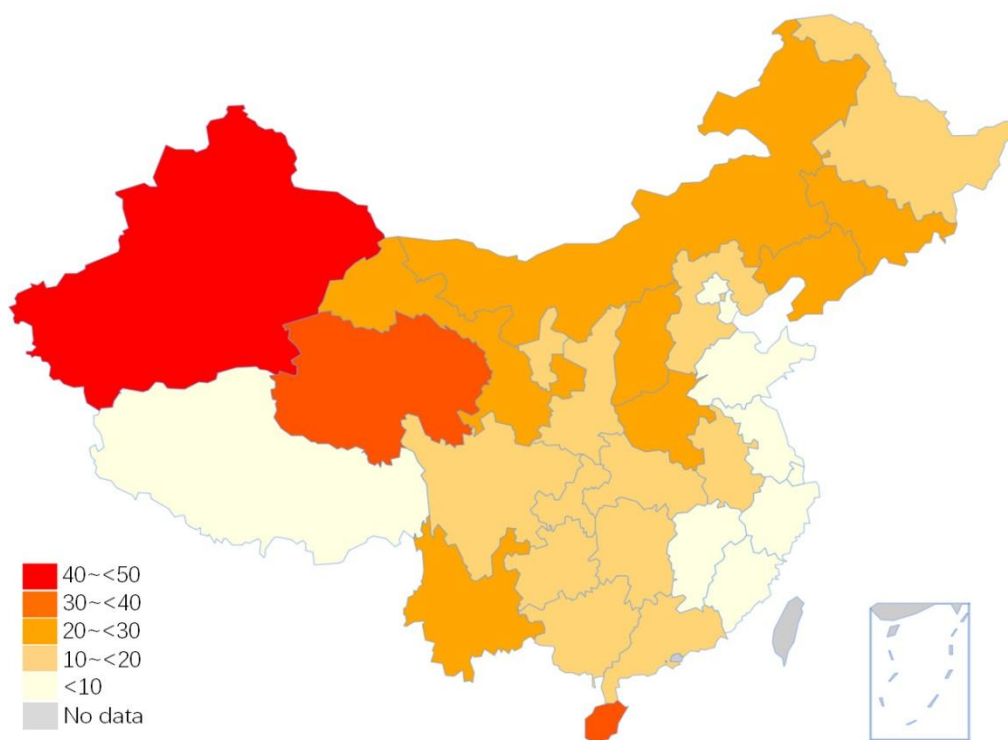

Data Source: National Health and Family Planning Commission of the People's Republic of China, Health and family planning statistical Yearbook of China, Beijing, 2016
