# Supplementary material for: Changing incidence of reported viral hepatitis in China from 2004 to 2016: an observational study
Source: PubMed Central journal article supplement — BMJ Open. 2019 Aug 18;9(8):e028248. doi: 10.1136/bmjopen-2018-028248 (PMC6701656; doi:10.1136/bmjopen-2018-028248), 2019-08-18
Supplement: bmjopen-2018-028248supp008.pdf [file bmjopen-2018-028248supp008.pdf]

**Appendix Figure 3: Annual reported incidence of viral hepatitis overall in different provinces, China, 2004-2015**

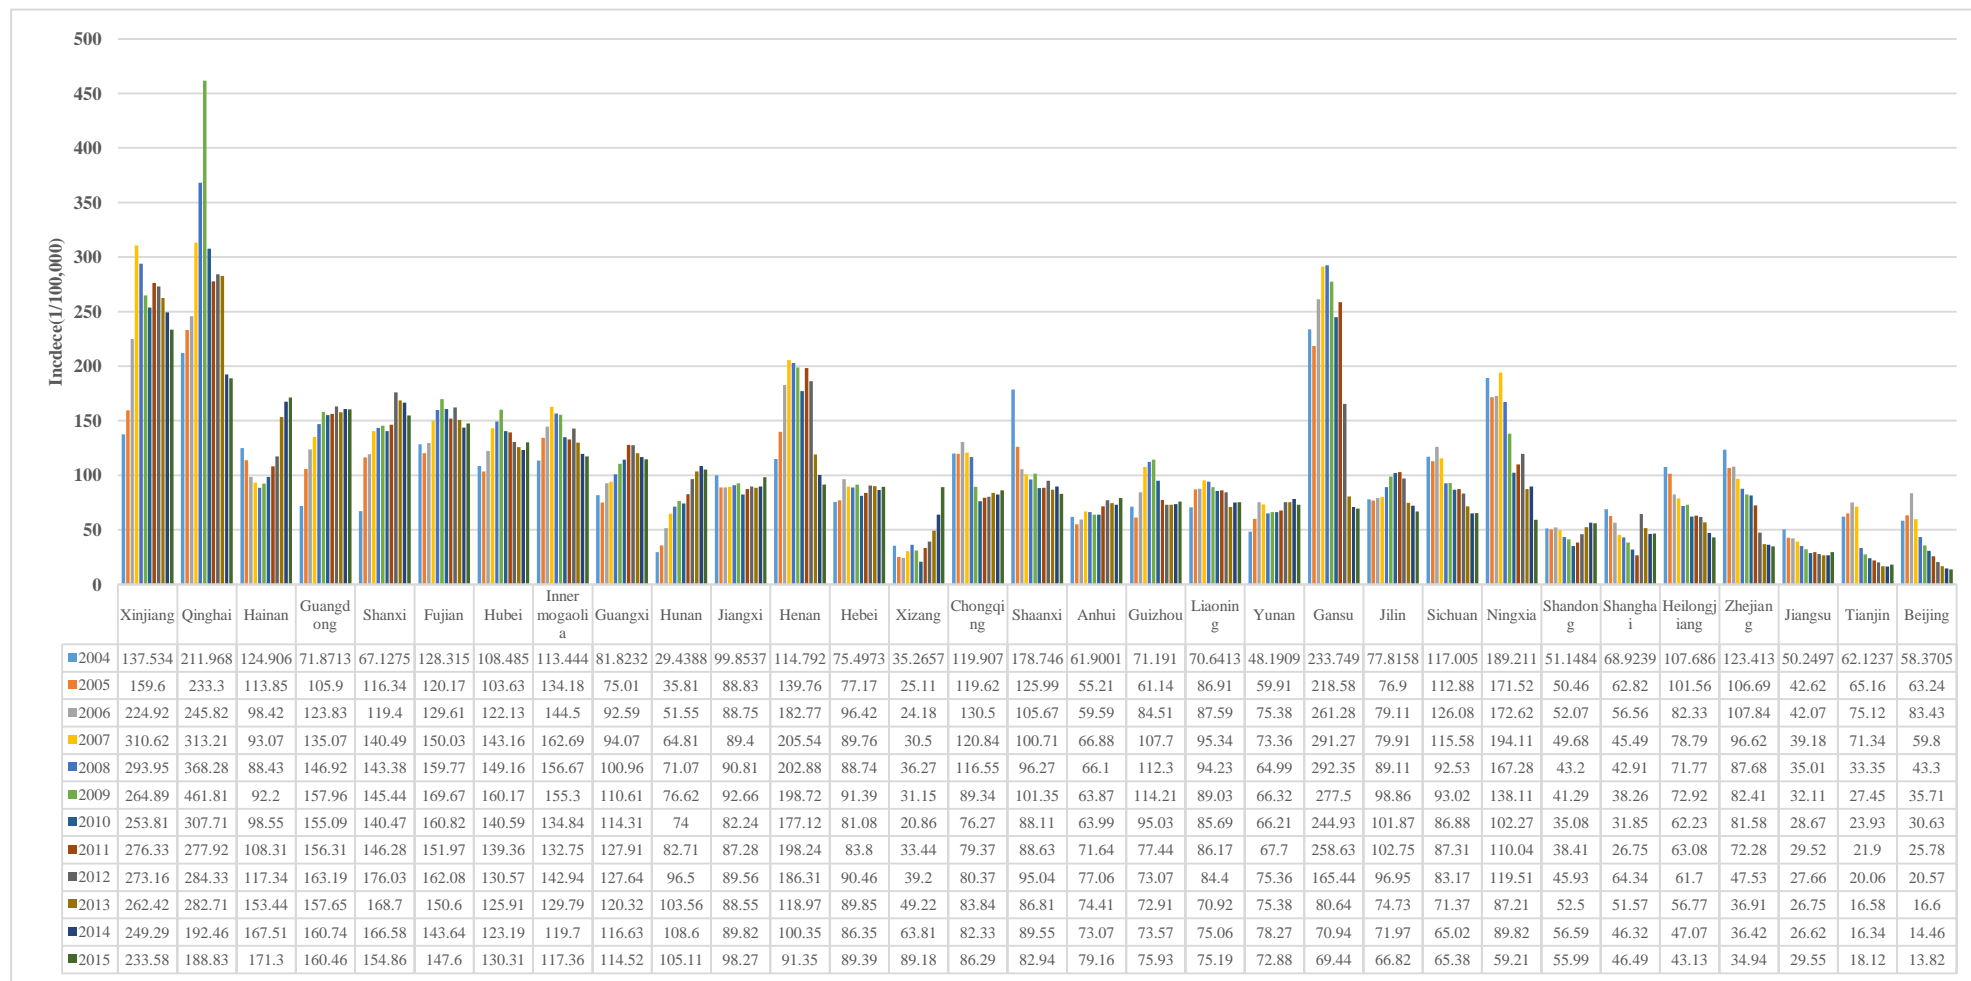

Data Source: China Center for Disease Control and Prevention. The Public Health Science Data Center. <http://www.phsciencedata.cn/Share/index.jsp>
