# Supplementary material for: Changing incidence of reported viral hepatitis in China from 2004 to 2016: an observational study
Source: PubMed Central journal article supplement — BMJ Open. 2019 Aug 18;9(8):e028248. doi: 10.1136/bmjopen-2018-028248 (PMC6701656; doi:10.1136/bmjopen-2018-028248), 2019-08-18
Supplement: bmjopen-2018-028248supp010.pdf [file bmjopen-2018-028248supp010.pdf]

**Appendix Table 6. Date of birth of reported HBV cases in different age groups from 2004-2013**

| Age groups | Date of birth | Trend    | <i>P</i> value | Joinpoint | Date of birth | Trend    | <i>P</i> value |
|------------|---------------|----------|----------------|-----------|---------------|----------|----------------|
| 10~19      | 1985-2003     | Decrease | <0.05          | 2007      | 1985-1997     | Stable   | 0.8            |
|            |               |          |                |           | 1988-2003     | Decrease | <0.05          |
| 20~24      | 1980-1993     | Decrease | <0.05          | 2008      | 1980-1988     | Stable   | 0.2            |
|            |               |          |                |           | 1984-1993     | Decrease | <0.05          |
| 25~29      | 1975-1988     | Stable   | 0.9            | 2007      | 1975-1982     | Increase | <0.05          |
|            |               |          |                |           | 1978-1988     | Decrease | <0.05          |
| 30~39      | 1965-1983     | Stable   | 0.3            | 2007      | 1965-1977     | Increase | <0.05          |
|            |               |          |                |           | 1968-1983     | Decrease | <0.05          |
